# Supplementary material for: Metabolic Profiling of CSF from People Suffering from Sporadic and LRRK2 Parkinson’s Disease: A Pilot Study
Source: PubMed Central journal article supplement (PMC7693941; doi:10.3390/cells9112394), 2020-10-31

# Metabolic Profiling of CSF from People Suffering from Sporadic and LRRK2 Parkinson's Disease: A Pilot Study

Ali Yilmaz <sup>1,2,\*</sup>, Zafer Ugur <sup>1</sup>, Ilyas Ustun <sup>3</sup>, Sumeyya Akyol <sup>1</sup>, Ray O. Bahado-Singh <sup>1,2</sup>, Michael Maddens <sup>2,4</sup>, Jan O. Aasly <sup>5</sup> and Stewart F. Graham <sup>1,2</sup>

<sup>1</sup> Metabolomics Department, Beaumont Research Institute, Beaumont Health, Royal Oak, MI 48073, USA; zaferugur34@gmail.com (Z.U.); Sumeyya.Akyol@beaumont.org (S.A.); Ray.Bahado-Singh@beaumont.org (R.O.B.-S.); Stewart.Graham@beaumont.org (S.F.G.)

<sup>2</sup> Oakland University-William Beaumont School of Medicine, Rochester, MI 48309, USA; Michael.Maddens@beaumont.org

<sup>3</sup> College of Computing and Digital Media, DePaul University, Chicago, IL 60604, USA; IUSTUN@depaul.edu

<sup>4</sup> Department of Internal Medicine, Beaumont Health, Royal Oak, MI 48073, USA

<sup>5</sup> Department of Neurology, St. Olavs Hospital and Department of Neuroscience, Norwegian University of Science and Technology, Trondheim, 7030, Norway; jan.aasly@ntnu.no

\* Correspondence: ali.yilmaz@beaumont.org; Tel: +1-248-551-2377

Received: 21 August 2020; Accepted: 20 October 2020; Published: date

**Search Terms:** Parkinson Disease, <sup>1</sup>H NMR, targeted Mass spectrometry, metabolomics, Machine learning

| <u>Page Number</u> | <u>Table of Contents</u>                                                                                                                                                                               |
|--------------------|--------------------------------------------------------------------------------------------------------------------------------------------------------------------------------------------------------|
| P3-8               | <b>Table S1:</b> Results of univariate analysis comparing the mean concentrations of metabolites in CSF obtained from LRRK2 control and LRRK2 PD patients.                                             |
| P9                 | <b>Table S2:</b> The results of the Metabolite Set Enrichment Analysis showing the metabolic pathways that were significantly perturbed when LRRK2 PD CSF was compared with their respective controls. |
| P10-15             | <b>Table S3:</b> Results of univariate analysis comparing the mean concentrations of metabolites in the CSF obtained from LRRK2 control and LRRK2 PD patients.                                         |
| P15                | <b>Table S4:</b> The results of the metabolite set enrichment analysis showing the metabolic pathways that were significantly perturbed when sPD CSF was compared with their respective controls.      |
| P16-20             | <b>Table S5:</b> Results of univariate analysis comparing the mean concentrations of metabolites in CSF obtained from sPD and LRRK2 PD patients.                                                       |
| P21                | <b>Table S6:</b> The results of the metabolite set enrichment analysis showing the metabolic pathways that were significantly perturbed when LRKK2 PD CSF was compared with sPD.                       |
| P22-26             | <b>Table S7:</b> Results of univariate analysis comparing the mean concentrations of metabolites in CSF obtained from sPD controls and LRRK2 PD controls.                                              |
| P27                | <b>Table S8:</b> Pairwise O-PLS-DA model performance metrics.                                                                                                                                          |
| P28-29             | <b>Table S9:</b> Optimized model parameters for each machine learning algorithm evaluated for prediction of sPD and LRRK2 PD in this study.                                                            |
| P30                | <b>Table S10:</b> The panel of metabolites as chosen using the RFE feature selection algorithm to generate our predictive models                                                                       |
| P31-32             | <b>Figure S1:</b> Representative 1D <sup>1</sup> H NMR spectrum of CSF; identified and quantified metabolites are displayed.                                                                           |

|        |                                                                                                                                                                       |
|--------|-----------------------------------------------------------------------------------------------------------------------------------------------------------------------|
| P33    | <b>Figure S2:</b> Investigation of outliers for each group by PCA (a–d) and Q2 vs. T <sup>2</sup> Hotelling plots (e,f).                                              |
| P34    | <b>Figure S3:</b> QQ-plots used to determine whether the metabolomics data for each metabolite are normally distributed and/or the corresponding p-value is inflated. |
| P35-42 | <b>Figure S4:</b> Box-plots showing pair-wise comparisons of the concentration values of all metabolites in CSF.                                                      |
| P43    | <b>Figure S5:</b> AUROC plot for the top three ML predictive models for the classification of LRRK2 PD as compared to their corresponding controls.                   |
| P44    | <b>Figure S6:</b> AUROC plot for the top three ML-based predictive models for the classification of sPD as compared to their corresponding controls.                  |
| P45    | <b>Figure S7:</b> AUROC plot for the top three ML-based predictive models for classification of sPD as compared to LRRK2 PD.                                          |

**Table S1:** The mean concentrations of all identified and quantified metabolites for LRRK2 controls and LRRK2 PD, and their corresponding p-values and q-values. The metabolites highlighted in bold are those at significantly different concentrations.

\*Metabolites which were non-normally distributed p-values were calculated using the Shapiro–Wilk test.

| Label              | LRRK2 Control |               | LRRK2 PD      |               | Statistical Analysis |               |               |
|--------------------|---------------|---------------|---------------|---------------|----------------------|---------------|---------------|
|                    | Mean          | Std           | Mean          | Std           | t-testPvalue         | Qvalue        | ShapiroPvalue |
| C0                 | 7.5640        | 0.7915        | 6.6645        | 2.3675        | 0.1154               | 0.4803        | 0.0002        |
| C10                | 0.1457        | 0.0271        | 0.1381        | 0.0270        | 0.3793               | 0.7493        | 0.4724        |
| C10:2              | 0.0362        | 0.0095        | 0.0362        | 0.0100        | 1.0000               | 1.0000        | 0.8958        |
| C14:2-OH           | 0.0052        | 0.0033        | 0.0054        | 0.0038        | 0.8941               | 0.9930        | 0.0030        |
| <b>C16-OH</b>      | <b>0.0062</b> | <b>0.0025</b> | <b>0.0040</b> | <b>0.0029</b> | <b>0.0137</b>        | <b>0.0223</b> | <b>0.0389</b> |
| C2                 | 1.7230        | 0.2609        | 1.6725        | 0.4125        | 0.6462               | 0.9047        | 0.4994        |
| C3                 | 0.1157        | 0.0225        | 0.1055        | 0.0296        | 0.2300               | 0.6764        | 0.5328        |
| C4                 | 0.0971        | 0.0302        | 0.0955        | 0.0317        | 0.8709               | 0.9930        | 0.2585        |
| C4:1               | 0.0239        | 0.0097        | 0.0201        | 0.0140        | 0.3232               | 0.7175        | 0.0192        |
| C5                 | 0.0853        | 0.1145        | 0.0576        | 0.0304        | 0.3025               | 0.6957        | 0.0000        |
| C5-DC (C6-OH)      | 0.0246        | 0.0127        | 0.0203        | 0.0116        | 0.2699               | 0.6835        | 0.0551        |
| C5-OH (C3-DC-M)    | 0.0676        | 0.0282        | 0.0575        | 0.0269        | 0.2558               | 0.6835        | 0.4762        |
| C7-DC              | 0.0076        | 0.0049        | 0.0058        | 0.0050        | 0.2566               | 0.6835        | 0.0098        |
| C9                 | 0.0275        | 0.0079        | 0.0216        | 0.0108        | 0.0575               | 0.3957        | 0.4546        |
| Dimethyl sulfone.1 | 9.1147        | 4.9093        | 15.4085       | 19.3427       | 0.1665               | 0.5712        | 0.0000        |
| Ethanol            | 61.9150       | 79.3710       | 23.3150       | 11.0145       | 0.0376               | 0.3188        | 0.0000        |
| Isopropyl alcohol  | 7.5820        | 12.3400       | 2.4065        | 0.8490        | 0.0690               | 0.4116        | 0.0000        |
| Methanol           | 432.8303      | 372.7052      | 716.3382      | 959.2531      | 0.2255               | 0.6764        | 0.0000        |
| Propylene glycol   | 0.1728        | 0.2077        | 0.2827        | 0.1785        | 0.0805               | 0.4322        | 0.0000        |
| Trp                | 3.7758        | 0.9294        | 3.8547        | 1.3585        | 0.8314               | 0.9651        | 0.3229        |
| Myo-inositol       | 85.3616       | 19.6186       | 85.5548       | 10.1697       | 0.9690               | 1.0000        | 0.0180        |
| Creatine           | 31.9261       | 5.7921        | 33.1441       | 5.5023        | 0.4995               | 0.8199        | 0.3545        |
| Creatinine         | 71.9600       | 12.1944       | 70.5550       | 12.8231       | 0.7245               | 0.9379        | 0.3644        |
| <b>Dopamine</b>    | <b>0.0076</b> | <b>0.0055</b> | <b>0.0131</b> | <b>0.0089</b> | <b>0.0244</b>        | <b>0.2866</b> | <b>0.0018</b> |
| Histamine          | 5.4497        | 5.0405        | 5.5947        | 5.1046        | 0.9285               | 0.9930        | 0.0001        |
| <b>Putrescine</b>  | <b>0.1319</b> | <b>0.0337</b> | <b>0.2047</b> | <b>0.0685</b> | <b>0.0001</b>        | <b>0.0206</b> | <b>0.0145</b> |

|                    |                |               |                |                |               |               |               |
|--------------------|----------------|---------------|----------------|----------------|---------------|---------------|---------------|
| Sarcosine          | 1.4526         | 0.4512        | 1.7607         | 0.8325         | 0.1539        | 0.5506        | 0.0001        |
| SDMA               | 0.1489         | 0.0409        | 0.1569         | 0.0423         | 0.5465        | 0.8199        | 0.3414        |
| t4-OH-Pro          | 0.6803         | 0.2166        | 0.6662         | 0.1598         | 0.8161        | 0.9651        | 0.2762        |
| Taurine            | 9.2390         | 1.9523        | 8.7800         | 1.9925         | 0.4663        | 0.8199        | 0.0867        |
| Pyroglutamic acid  | 60.0908        | 13.7298       | 69.7420        | 13.0648        | 0.0285        | 0.2866        | 0.5625        |
| Urea               | 152.3632       | 71.7065       | 120.8357       | 61.0592        | 0.1426        | 0.5341        | 0.0003        |
| Ala                | 77.5850        | 201.0863      | 37.6600        | 14.9355        | 0.3815        | 0.7493        | 0.0000        |
| Arg                | 22.7700        | 3.7910        | 25.6650        | 6.4101         | 0.0902        | 0.4402        | 0.9087        |
| <b>Asn</b>         | <b>7.0120</b>  | <b>1.2122</b> | <b>8.3735</b>  | <b>1.2159</b>  | <b>0.0011</b> | <b>0.0850</b> | <b>0.6623</b> |
| Asp                | 10.5517        | 16.1031       | 7.1347         | 6.9215         | 0.4030        | 0.7544        | 0.0000        |
| Gln                | 822.1000       | 246.6783      | 878.7000       | 424.5502       | 0.6092        | 0.8679        | 0.0001        |
| Gly                | 7.9330         | 2.0113        | 8.7725         | 2.6470         | 0.2658        | 0.6835        | 0.0176        |
| His                | 15.6635        | 2.2975        | 18.3783        | 4.9689         | 0.0326        | 0.3090        | 0.0002        |
| Leu                | 14.9190        | 4.4194        | 15.5565        | 5.7362         | 0.6960        | 0.9264        | 0.0001        |
| <b>L-Glutamine</b> | <b>43.1854</b> | <b>9.7439</b> | <b>54.6631</b> | <b>16.9382</b> | <b>0.0124</b> | <b>0.0623</b> | <b>0.0363</b> |
| Lys                | 38.2750        | 8.8781        | 38.3050        | 8.0157         | 0.9911        | 1.0000        | 0.4616        |
| <b>Met</b>         | <b>3.7040</b>  | <b>0.7461</b> | <b>4.4695</b>  | <b>1.1211</b>  | <b>0.0152</b> | <b>0.0223</b> | <b>0.0094</b> |
| Orn                | 4.9225         | 1.3128        | 6.3245         | 1.9638         | 0.0115        | 0.2227        | 0.0113        |
| Ser                | 30.9850        | 6.4278        | 34.0950        | 6.4972         | 0.1363        | 0.5227        | 0.6391        |
| <b>Thr</b>         | <b>33.5350</b> | <b>5.9818</b> | <b>39.6450</b> | <b>7.2261</b>  | <b>0.0060</b> | <b>0.0323</b> | <b>0.6003</b> |
| Trp                | 2.2756         | 0.6153        | 2.4530         | 0.5168         | 0.3298        | 0.7175        | 0.0017        |
| Tyr                | 9.4930         | 2.5680        | 12.3845        | 4.6551         | 0.0198        | 0.2660        | 0.0000        |
| Val                | 18.4700        | 5.2157        | 19.1400        | 6.7664         | 0.7277        | 0.9379        | 0.0171        |
| Ile                | 6.2197         | 3.4536        | 5.8129         | 3.7693         | 0.7239        | 0.9379        | 0.0000        |
| CA                 | 0.0065         | 0.0074        | 0.0115         | 0.0122         | 0.1250        | 0.4908        | 0.0000        |
| CDCA               | 0.0065         | 0.0109        | 0.0130         | 0.0141         | 0.1080        | 0.4803        | 0.0000        |
| DCA                | 0.0143         | 0.0136        | 0.0319         | 0.0317         | 0.0276        | 0.2866        | 0.0000        |
| GCA                | 0.0001         | 0.0002        | 0.0035         | 0.0129         | 0.2476        | 0.6835        | 0.0000        |
| GCDCA              | 0.0094         | 0.0057        | 0.0163         | 0.0180         | 0.1110        | 0.4803        | 0.0000        |
| <b>GDCA</b>        | <b>0.0018</b>  | <b>0.0018</b> | <b>0.0048</b>  | <b>0.0067</b>  | <b>0.0590</b> | <b>0.3957</b> | <b>0.0000</b> |
| GUDCA              | 0.0017         | 0.0010        | 0.0019         | 0.0016         | 0.5532        | 0.8199        | 0.0000        |
| HDCA               | 0.0045         | 0.0060        | 0.0035         | 0.0036         | 0.5291        | 0.8199        | 0.0000        |
| LCA                | 0.0012         | 0.0035        | 0.0010         | 0.0025         | 0.7959        | 0.9563        | 0.0000        |

|                              |                  |                 |                  |                 |               |               |               |
|------------------------------|------------------|-----------------|------------------|-----------------|---------------|---------------|---------------|
| MCA(b)                       | 0.0001           | 0.0002          | 0.0004           | 0.0007          | 0.0351        | 0.3142        | 0.0000        |
| MCA(o)                       | 0.0012           | 0.0018          | 0.0011           | 0.0018          | 0.9314        | 0.9930        | 0.0000        |
| <b>TCA</b>                   | <b>0.0094</b>    | <b>0.0002</b>   | <b>0.0009</b>    | <b>0.0019</b>   | <b>0.0493</b> | <b>0.3778</b> | <b>0.0000</b> |
| TCDCA                        | 0.0017           | 0.0011          | 0.0022           | 0.0013          | 0.2432        | 0.6835        | 0.0122        |
| TDCA                         | 0.0049           | 0.0030          | 0.0055           | 0.0029          | 0.5207        | 0.8199        | 0.0016        |
| TMCA(a+b)                    | 0.0134           | 0.0005          | 0.0134           | 0.0006          | 0.7739        | 0.9563        | 0.0000        |
| TUDCA                        | 0.0041           | 0.0002          | 0.0041           | 0.0003          | 0.5602        | 0.8199        | 0.0000        |
| UDCA                         | 0.0071           | 0.0058          | 0.0087           | 0.0061          | 0.3846        | 0.7493        | 0.0191        |
| Dimethylamine                | 1.8605           | 0.9227          | 1.8716           | 1.4451          | 0.9771        | 1.0000        | 0.0000        |
| Acetone                      | 4.6190           | 2.2216          | 4.3898           | 1.9333          | 0.7297        | 0.9379        | 0.3470        |
| Ascorbate                    | 138.1400         | 21.4151         | 145.3800         | 24.7369         | 0.3286        | 0.7175        | 0.0630        |
| cis-Aconitate                | 2.8900           | 1.0213          | 3.1750           | 1.0672          | 0.3936        | 0.7493        | 0.2485        |
| 2-Aminobutyrate              | 6.9000           | 4.4482          | 5.3400           | 3.6151          | 0.2311        | 0.6764        | 0.0000        |
| 2-Hydroxybutyric acid        | 23.7457          | 6.9783          | 20.4286          | 6.0432          | 0.1163        | 0.4803        | 0.6756        |
| 2-Hydroxyisovalerate         | 3.5283           | 1.1531          | 3.9484           | 2.5522          | 0.5063        | 0.8199        | 0.0000        |
| 2-Oxoglutarate               | 7.7350           | 2.1261          | 8.1750           | 1.6714          | 0.4713        | 0.8199        | 0.4158        |
| <b>3-Hydroxybutyric acid</b> | <b>17.6058</b>   | <b>11.5855</b>  | <b>12.6481</b>   | <b>4.0959</b>   | <b>0.0791</b> | <b>0.0432</b> | <b>0.0000</b> |
| 3-Hydroxyisobutyrate         | 10.1800          | 2.1118          | 9.4800           | 2.6957          | 0.3664        | 0.7493        | 0.1068        |
| 3-Hydroxyisovalerate         | 2.9500           | 1.0938          | 2.8300           | 1.3967          | 0.7639        | 0.9534        | 0.0042        |
| 3-Hydroxyisovaleric acid     | 2.9645           | 1.2457          | 2.9603           | 1.5409          | 0.9926        | 1.0000        | 0.0018        |
| Acetic acid                  | 31.0011          | 11.3042         | 30.1263          | 4.6454          | 0.7507        | 0.9501        | 0.0000        |
| Acetoacetate                 | 5.5904           | 1.6029          | 5.6779           | 1.4719          | 0.8583        | 0.9871        | 0.4822        |
| Citric acid                  | 149.1080         | 38.2042         | 157.3319         | 30.6221         | 0.4572        | 0.8199        | 0.5977        |
| Formate                      | 31.3043          | 5.4431          | 29.9754          | 7.3111          | 0.5183        | 0.8199        | 0.0002        |
| <b>L-Lactic acid</b>         | <b>1346.9577</b> | <b>184.8950</b> | <b>1537.9513</b> | <b>361.6891</b> | <b>0.0422</b> | <b>0.0945</b> | <b>0.0002</b> |
| L-Phenylalanine              | 5.9314           | 1.5825          | 5.9951           | 1.6860          | 0.9026        | 0.9930        | 0.8749        |
| Malonate                     | 8.0450           | 2.0431          | 8.6400           | 2.7708          | 0.4443        | 0.8129        | 0.0184        |
| Pantothenate                 | 10.0850          | 2.7810          | 8.8250           | 2.8711          | 0.1667        | 0.5712        | 0.6203        |
| Pyruvic acid                 | 14.7720          | 11.0199         | 17.2167          | 15.9741         | 0.5765        | 0.8362        | 0.0001        |
| Succinate                    | 10.9358          | 3.5668          | 11.5770          | 3.2635          | 0.5566        | 0.8199        | 0.0175        |
| Acetaminophen                | 3.2150           | 2.7141          | 3.7200           | 2.7152          | 0.5598        | 0.8199        | 0.0000        |
| Choline                      | 0.8300           | 0.4843          | 1.1353           | 0.6049          | 0.0861        | 0.4402        | 0.0001        |

|                    |               |               |               |               |               |               |               |
|--------------------|---------------|---------------|---------------|---------------|---------------|---------------|---------------|
| lysoPC a C26:1     | 0.0114        | 0.0127        | 0.0106        | 0.0110        | 0.8222        | 0.9651        | 0.0000        |
| lysoPC a C28:0     | 0.0684        | 0.0284        | 0.0716        | 0.0197        | 0.6861        | 0.9264        | 0.0128        |
| lysoPC a C28:1     | 0.0250        | 0.0205        | 0.0249        | 0.0209        | 0.9879        | 1.0000        | 0.0001        |
| PC aa C28:1        | 0.0314        | 0.0100        | 0.0352        | 0.0134        | 0.3144        | 0.7130        | 0.1490        |
| PC aa C30:0        | 0.1447        | 0.0346        | 0.1493        | 0.0315        | 0.6661        | 0.9168        | 0.3999        |
| PC aa C32:0        | 0.8991        | 0.2669        | 0.9194        | 0.2079        | 0.7899        | 0.9563        | 0.1535        |
| PC aa C32:1        | 0.3593        | 0.0973        | 0.3625        | 0.0942        | 0.9164        | 0.9930        | 0.1076        |
| PC aa C32:2        | 0.0197        | 0.0194        | 0.0161        | 0.0112        | 0.4774        | 0.8199        | 0.0024        |
| PC aa C34:1        | 5.0525        | 1.5010        | 5.2595        | 1.5108        | 0.6663        | 0.9168        | 0.2255        |
| <b>PC aa C34:2</b> | <b>1.1150</b> | <b>0.1039</b> | <b>1.0176</b> | <b>0.1563</b> | <b>0.0258</b> | <b>0.0866</b> | <b>0.0344</b> |
| PC aa C34:4        | 0.0142        | 0.0040        | 0.0128        | 0.0067        | 0.4083        | 0.7557        | 0.1116        |
| PC aa C36:0        | 0.1747        | 0.0312        | 0.1760        | 0.0326        | 0.8982        | 0.9930        | 0.6430        |
| PC aa C36:1        | 0.6716        | 0.1784        | 0.7109        | 0.1911        | 0.5055        | 0.8199        | 0.4740        |
| PC aa C36:2        | 0.5483        | 0.1482        | 0.6017        | 0.2339        | 0.3934        | 0.7493        | 0.0001        |
| PC aa C36:4        | 0.4630        | 0.1880        | 0.4570        | 0.1830        | 0.9197        | 0.9930        | 0.0002        |
| PC aa C36:5        | 0.0339        | 0.0079        | 0.0309        | 0.0096        | 0.2798        | 0.6858        | 0.0003        |
| PC aa C36:6        | 0.0032        | 0.0021        | 0.0030        | 0.0025        | 0.7859        | 0.9563        | 0.0062        |
| PC aa C38:3        | 0.2231        | 0.0899        | 0.2264        | 0.0918        | 0.9092        | 0.9930        | 0.1442        |
| PC aa C38:4        | 0.5471        | 0.1859        | 0.5464        | 0.1666        | 0.9901        | 1.0000        | 0.3811        |
| PC aa C38:5        | 0.1303        | 0.0523        | 0.1251        | 0.0525        | 0.7554        | 0.9501        | 0.0003        |
| PC aa C38:6        | 0.1865        | 0.0731        | 0.1975        | 0.0908        | 0.6755        | 0.9216        | 0.0016        |
| PC aa C40:3        | 0.0128        | 0.0065        | 0.0108        | 0.0068        | 0.3463        | 0.7434        | 0.0149        |
| PC aa C40:4        | 0.0490        | 0.0224        | 0.0535        | 0.0170        | 0.4840        | 0.8199        | 0.3634        |
| PC aa C40:5        | 0.0408        | 0.0175        | 0.0372        | 0.0175        | 0.5255        | 0.8199        | 0.4347        |
| PC aa C40:6        | 0.2308        | 0.0432        | 0.2528        | 0.0595        | 0.1889        | 0.6165        | 0.0030        |
| PC aa C42:2        | 0.0211        | 0.0071        | 0.0205        | 0.0059        | 0.7918        | 0.9563        | 0.0308        |
| PC ae C30:1        | 0.0060        | 0.0033        | 0.0072        | 0.0049        | 0.3878        | 0.7493        | 0.1291        |
| PC ae C32:1        | 0.0577        | 0.0241        | 0.0593        | 0.0204        | 0.8167        | 0.9651        | 0.1742        |
| PC ae C32:2        | 0.0158        | 0.0078        | 0.0138        | 0.0067        | 0.3918        | 0.7493        | 0.1004        |
| PC ae C34:0        | 0.0300        | 0.0128        | 0.0297        | 0.0102        | 0.9243        | 0.9930        | 0.1300        |
| PC ae C34:1        | 0.2016        | 0.0633        | 0.2084        | 0.0614        | 0.7340        | 0.9379        | 0.0324        |
| PC ae C34:2        | 0.1569        | 0.0571        | 0.1580        | 0.0586        | 0.9502        | 0.9999        | 0.0905        |
| PC ae C34:3        | 0.0186        | 0.0084        | 0.0200        | 0.0091        | 0.6165        | 0.8707        | 0.1194        |

|                    |               |               |               |               |               |               |               |
|--------------------|---------------|---------------|---------------|---------------|---------------|---------------|---------------|
| <b>PC ae C36:1</b> | <b>0.4928</b> | <b>0.0479</b> | <b>0.4564</b> | <b>0.0679</b> | <b>0.0577</b> | <b>0.0957</b> | <b>0.8053</b> |
| <b>PC ae C36:2</b> | <b>0.1233</b> | <b>0.0115</b> | <b>0.1105</b> | <b>0.0171</b> | <b>0.0081</b> | <b>0.0227</b> | <b>0.0465</b> |
| PC ae C36:3        | 0.0323        | 0.0123        | 0.0314        | 0.0145        | 0.8332        | 0.9651        | 0.1397        |
| PC ae C36:4        | 0.0585        | 0.0215        | 0.0535        | 0.0259        | 0.5065        | 0.8199        | 0.7408        |
| PC ae C36:5        | 0.0503        | 0.0201        | 0.0504        | 0.0207        | 0.9939        | 1.0000        | 0.0127        |
| PC ae C38:0        | 0.0189        | 0.0061        | 0.0159        | 0.0036        | 0.0667        | 0.4116        | 0.0008        |
| <b>PC ae C38:1</b> | <b>0.1588</b> | <b>0.0207</b> | <b>0.1359</b> | <b>0.0292</b> | <b>0.0068</b> | <b>0.0223</b> | <b>0.3025</b> |
| PC ae C38:2        | 0.1003        | 0.0224        | 0.0870        | 0.0216        | 0.0636        | 0.4098        | 0.1915        |
| <b>PC ae C38:3</b> | <b>0.0986</b> | <b>0.0117</b> | <b>0.0824</b> | <b>0.0256</b> | <b>0.0143</b> | <b>0.0223</b> | <b>0.0001</b> |
| PC ae C38:4        | 0.0459        | 0.0201        | 0.0522        | 0.0241        | 0.3756        | 0.7493        | 0.0028        |
| PC ae C38:5        | 0.0658        | 0.0217        | 0.0550        | 0.0210        | 0.1199        | 0.4826        | 0.0661        |
| PC ae C38:6        | 0.0188        | 0.0115        | 0.0228        | 0.0123        | 0.2939        | 0.6858        | 0.7389        |
| PC ae C40:1        | 0.0205        | 0.0085        | 0.0203        | 0.0083        | 0.9253        | 0.9930        | 0.0366        |
| PC ae C40:2        | 0.0400        | 0.0062        | 0.0348        | 0.0064        | 0.0129        | 0.2227        | 0.7551        |
| <b>PC ae C40:3</b> | <b>0.0460</b> | <b>0.0149</b> | <b>0.0409</b> | <b>0.0134</b> | <b>0.0267</b> | <b>0.0684</b> | <b>0.0015</b> |
| PC ae C40:4        | 0.0315        | 0.0134        | 0.0294        | 0.0081        | 0.5435        | 0.8199        | 0.5508        |
| PC ae C40:6        | 0.0220        | 0.0083        | 0.0218        | 0.0096        | 0.9442        | 0.9999        | 0.5672        |
| PC ae C44:6        | 0.0117        | 0.0048        | 0.0129        | 0.0040        | 0.3956        | 0.7493        | 0.0004        |
| H1                 | 11859.2500    | 2441.6785     | 13003.5000    | 2978.6285     | 0.1919        | 0.6165        | 0.1441        |
| <b>Xanthine</b>    | <b>0.8590</b> | <b>0.2287</b> | <b>0.7312</b> | <b>0.2114</b> | <b>0.0742</b> | <b>0.4269</b> | <b>0.3569</b> |
| SM (OH) C14:1      | 0.0388        | 0.0115        | 0.0449        | 0.0168        | 0.1880        | 0.6165        | 0.2069        |
| SM (OH) C16:1      | 0.0370        | 0.0115        | 0.0400        | 0.0182        | 0.5304        | 0.8199        | 0.0625        |
| SM (OH) C22:1      | 0.0352        | 0.0083        | 0.0421        | 0.0161        | 0.0958        | 0.4434        | 0.0012        |
| SM (OH) C22:2      | 0.0433        | 0.0201        | 0.0574        | 0.0312        | 0.0964        | 0.4434        | 0.0001        |
| SM C16:0           | 0.8067        | 0.2742        | 0.9141        | 0.3458        | 0.2833        | 0.6858        | 0.5641        |
| SM C16:1           | 0.0888        | 0.0293        | 0.1068        | 0.0358        | 0.0900        | 0.4402        | 0.1691        |
| SM C18:0           | 0.8245        | 0.2461        | 0.9453        | 0.3274        | 0.1953        | 0.6165        | 0.3750        |
| SM C18:1           | 0.2086        | 0.0667        | 0.2346        | 0.0755        | 0.2558        | 0.6835        | 0.4190        |
| SM C20:2           | 0.0013        | 0.0023        | 0.0025        | 0.0035        | 0.2078        | 0.6433        | 0.0000        |
| SM C24:0           | 0.1235        | 0.0483        | 0.1339        | 0.0588        | 0.5429        | 0.8199        | 0.6208        |
| SM C24:1           | 0.4527        | 0.1216        | 0.5088        | 0.2016        | 0.2933        | 0.6858        | 0.0300        |
| SM C26:0           | 0.0055        | 0.0034        | 0.0051        | 0.0030        | 0.6962        | 0.9264        | 0.1606        |
| SM C26:1           | 0.0058        | 0.0055        | 0.0079        | 0.0061        | 0.2717        | 0.6835        | 0.0051        |



|           |           |          |           |          |        |        |        |
|-----------|-----------|----------|-----------|----------|--------|--------|--------|
| Fructose  | 55.3031   | 19.0176  | 61.4039   | 16.6400  | 0.2871 | 0.6858 | 0.1326 |
| Mannose   | 23.1880   | 4.7289   | 24.3184   | 8.3913   | 0.6028 | 0.8665 | 0.0001 |
| Glycerol  | 186.7088  | 59.4581  | 175.2335  | 57.0755  | 0.5372 | 0.8199 | 0.5866 |
| D-Glucose | 2165.1198 | 380.7512 | 2333.5176 | 349.5871 | 0.1533 | 0.5506 | 0.0077 |

**Table S2:** Results of the metabolite set enrichment analysis showing which metabolic pathways that were significantly perturbed in LRKK2 PD CSF when compared to their corresponding controls.

| <b>Pathways</b>                                   | <b>Total</b> | <b>Hits</b> | <b>p values</b> | <b>FDR</b> |
|---------------------------------------------------|--------------|-------------|-----------------|------------|
| Spermidine and spermine biosynthesis              | 18           | 3           | 0.00615         | 0.04864    |
| Fatty Acid metabolism                             | 43           | 3           | 0.00287         | 0.04562    |
| Mitochondrial Beta oxidation of LCFA <sup>a</sup> | 28           | 1           | 0.02934         | 0.03437    |
| Mitochondrial Beta oxidation of SCFA <sup>b</sup> | 27           | 1           | 0.03869         | 0.01215    |
| Methionine metabolism                             | 43           | 6           | 0.03218         | 0.02929    |
| Bile Acid Biosynthesis                            | 65           | 2           | 0.04376         | 0.02988    |
| Inositol metabolism                               | 74           | 4           | 0.04769         | 0.2873     |
| Beta oxidation of very LCFA <sup>a</sup>          | 17           | 2           | 0.04895         | 0.57938    |
| Purine metabolism                                 | 11           | 1           | 0.04775         | 0.37697    |
| Urea cycle                                        | 19           | 6           | 0.05831         | 0.67286    |
| Taurine and Hypotaurine Metabolism                | 12           | 1           | 0.06100         | 0.70102    |

<sup>a</sup> Long chain fatty acid.

<sup>b</sup> Short chain fatty acid.

**Table S3:** The mean concentrations of all identified and quantified metabolites for sPD controls, sPD and their corresponding p-values and q-values. The metabolites highlighted in bold are those at significantly different concentrations.

\*Metabolites which were non-normally distributed p-values were calculated using the Shapiro–Wilk test.

| Label               | sPD Control   |               | sPD           |                | Statistical Analysis |               |               |
|---------------------|---------------|---------------|---------------|----------------|----------------------|---------------|---------------|
|                     | Mean          | Std           | Mean          | Std            | t-testPvalue         | Qvalue        | ShapiroPvalue |
| <b>C0</b>           | <b>7.516</b>  | <b>1.537</b>  | <b>7.074</b>  | <b>2.9413</b>  | <b>0.0555</b>        | <b>0.0968</b> | <b>0.0003</b> |
| C10                 | 0.152         | 0.027         | 0.142         | 0.0207         | 0.2076               | 0.9270        | 0.0419        |
| C10:2               | 0.035         | 0.007         | 0.037         | 0.0097         | 0.5781               | 0.9677        | 0.4235        |
| <b>C14:2-OH</b>     | <b>0.006</b>  | <b>0.003</b>  | <b>0.004</b>  | <b>0.0036</b>  | <b>0.0469</b>        | <b>0.0927</b> | <b>0.0018</b> |
| <b>C16-OH</b>       | <b>0.003</b>  | <b>0.004</b>  | <b>0.003</b>  | <b>0.0028</b>  | <b>0.0378</b>        | <b>0.0968</b> | <b>0.0000</b> |
| C2                  | 1.511         | 0.262         | 1.689         | 0.3387         | 0.0715               | 0.9270        | 0.7369        |
| C3                  | 0.114         | 0.026         | 0.112         | 0.0383         | 0.8742               | 0.9719        | 0.0402        |
| C4                  | 0.099         | 0.023         | 0.102         | 0.0249         | 0.6642               | 0.9677        | 0.0000        |
| C4:1                | 0.019         | 0.012         | 0.021         | 0.0108         | 0.6719               | 0.9677        | 0.2997        |
| C5                  | 0.070         | 0.019         | 0.075         | 0.0209         | 0.4851               | 0.9677        | 0.0157        |
| C5-DC (C6-OH)       | 0.022         | 0.011         | 0.023         | 0.0126         | 0.8542               | 0.9719        | 0.1622        |
| C5-OH (C3-DC-M)     | 0.062         | 0.019         | 0.061         | 0.0243         | 0.8802               | 0.9719        | 0.5825        |
| C7-DC               | 0.009         | 0.005         | 0.007         | 0.0050         | 0.2082               | 0.9270        | 0.0962        |
| C9                  | 0.022         | 0.008         | 0.024         | 0.0108         | 0.4477               | 0.9610        | 0.3044        |
| Dimethyl sulfone.1  | 9.335         | 5.974         | 12.391        | 6.2499         | 0.1223               | 0.9270        | 0.0003        |
| Ethanol             | 18.280        | 9.966         | 73.285        | 191.3642       | 0.2070               | 0.9270        | 0.0000        |
| Isopropyl alcohol   | 1.770         | 0.753         | 84.259        | 361.9489       | 0.3145               | 0.9270        | 0.0000        |
| Methanol            | 225.355       | 274.341       | 378.311       | 351.8160       | 0.1335               | 0.9270        | 0.0000        |
| Propylene glycol    | 0.435         | 0.760         | 0.802         | 2.0735         | 0.4622               | 0.9645        | 0.0000        |
| Trp                 | 5.260         | 6.195         | 3.597         | 1.1350         | 0.2449               | 0.9270        | 0.0000        |
| <b>Myo-inositol</b> | <b>87.670</b> | <b>17.284</b> | <b>94.481</b> | <b>19.0134</b> | <b>0.0243</b>        | <b>0.0927</b> | <b>0.0197</b> |

|                   |               |              |               |               |               |               |               |
|-------------------|---------------|--------------|---------------|---------------|---------------|---------------|---------------|
| Creatine          | 31.525        | 4.180        | 33.146        | 5.3577        | 0.2929        | 0.9270        | 0.0979        |
| Creatinine        | 68.340        | 9.821        | 67.780        | 12.5600       | 0.8760        | 0.9719        | 0.4173        |
| Dopamine          | 0.010         | 0.005        | 0.012         | 0.0061        | 0.2431        | 0.9270        | 0.0000        |
| Histamine         | 3.270         | 2.648        | 5.710         | 6.7862        | 0.1424        | 0.9270        | 0.0000        |
| <b>Putrescine</b> | <b>0.133</b>  | <b>0.048</b> | <b>0.162</b>  | <b>0.0546</b> | <b>0.0777</b> | <b>0.0927</b> | <b>0.0070</b> |
| Sarcosine         | 1.620         | 0.518        | 1.665         | 0.7586        | 0.8283        | 0.9719        | 0.0002        |
| SDMA              | 0.156         | 0.039        | 0.158         | 0.0306        | 0.8722        | 0.9719        | 0.0111        |
| t4-OH-Pro         | 0.672         | 0.311        | 0.646         | 0.1985        | 0.7589        | 0.9677        | 0.0028        |
| Taurine           | 8.497         | 1.785        | 7.784         | 2.2162        | 0.2692        | 0.9270        | 0.0795        |
| Pyroglutamic acid | 67.730        | 17.332       | 69.668        | 15.3749       | 0.7104        | 0.9677        | 0.1274        |
| Urea              | 305.365       | 614.697      | 135.707       | 69.3058       | 0.2275        | 0.9270        | 0.0000        |
| Ala               | 35.520        | 9.389        | 36.885        | 15.2885       | 0.7355        | 0.9677        | 0.0002        |
| Arg               | 24.070        | 4.088        | 23.610        | 5.1290        | 0.7555        | 0.9677        | 0.0298        |
| Asn               | 7.359         | 1.315        | 7.833         | 1.7213        | 0.3340        | 0.9270        | 0.0630        |
| Asp               | 13.047        | 11.114       | 28.304        | 82.0962       | 0.4274        | 0.9479        | 0.0000        |
| Gln               | 815.450       | 152.453      | 737.250       | 341.3445      | 0.3554        | 0.9277        | 0.0000        |
| Gly               | 7.555         | 1.985        | 12.630        | 22.3671       | 0.3185        | 0.9270        | 0.0000        |
| <b>His</b>        | <b>13.427</b> | <b>6.035</b> | <b>17.214</b> | <b>7.1285</b> | <b>0.0777</b> | <b>0.0927</b> | <b>0.0000</b> |
| Leu               | 16.835        | 6.608        | 17.348        | 6.6228        | 0.8078        | 0.9719        | 0.0000        |
| L-Glutamine       | 50.365        | 17.184       | 47.368        | 13.9630       | 0.5485        | 0.9677        | 0.1248        |
| Lys               | 39.645        | 9.767        | 39.490        | 7.9216        | 0.9563        | 0.9719        | 0.0333        |
| <b>Met</b>        | <b>3.543</b>  | <b>0.614</b> | <b>4.079</b>  | <b>1.1650</b> | <b>0.0766</b> | <b>0.0893</b> | <b>0.0001</b> |
| Orn               | 5.255         | 1.354        | 7.654         | 10.4987       | 0.3173        | 0.9270        | 0.0000        |
| Ser               | 28.935        | 5.121        | 27.200        | 8.4121        | 0.4357        | 0.9479        | 0.0008        |
| Thr               | 32.600        | 7.983        | 37.315        | 10.9019       | 0.1269        | 0.9270        | 0.1939        |
| Trp               | 2.241         | 0.450        | 2.544         | 0.9251        | 0.1949        | 0.9270        | 0.0000        |
| Tyr               | 9.312         | 2.027        | 10.013        | 3.2771        | 0.4209        | 0.9479        | 0.0448        |
| Val               | 19.740        | 7.052        | 20.415        | 6.9983        | 0.7629        | 0.9677        | 0.0010        |
| Ile               | 7.900         | 3.716        | 6.452         | 3.3387        | 0.2028        | 0.9270        | 0.0022        |
| CA                | 0.010         | 0.012        | 0.013         | 0.0124        | 0.3573        | 0.9277        | 0.0000        |
| CDCA              | 0.010         | 0.012        | 0.012         | 0.0125        | 0.5696        | 0.9677        | 0.0000        |
| DCA               | 0.022         | 0.015        | 0.020         | 0.0199        | 0.7741        | 0.9719        | 0.0040        |
| GCA               | 0.002         | 0.004        | 0.001         | 0.0017        | 0.3231        | 0.9270        | 0.0000        |

|                              |                 |                |                 |                 |               |               |               |
|------------------------------|-----------------|----------------|-----------------|-----------------|---------------|---------------|---------------|
| <b>GCDCA</b>                 | <b>0.020</b>    | <b>0.018</b>   | <b>0.010</b>    | <b>0.0055</b>   | <b>0.0235</b> | <b>0.0704</b> | <b>0.0000</b> |
| GDCA                         | 0.004           | 0.005          | 0.002           | 0.0026          | 0.3438        | 0.9277        | 0.0000        |
| GUDCA                        | 0.002           | 0.001          | 0.002           | 0.0009          | 0.6323        | 0.9677        | 0.0000        |
| HDCA                         | 0.004           | 0.005          | 0.004           | 0.0051          | 0.8824        | 0.9719        | 0.0000        |
| LCA                          | 0.001           | 0.003          | 0.000           | 0.0009          | 0.1037        | 0.9270        | 0.0000        |
| MCA(b)                       | 0.000           | 0.000          | 0.000           | 0.0007          | 0.3645        | 0.9293        | 0.0000        |
| MCA(o)                       | 0.001           | 0.001          | 0.002           | 0.0029          | 0.2172        | 0.9270        | 0.0000        |
| TCA                          | 0.000           | 0.001          | 0.000           | 0.0000          | 0.1785        | 0.9270        | 0.0000        |
| TCDCA                        | 0.002           | 0.001          | 0.003           | 0.0013          | 0.2933        | 0.9270        | 0.0120        |
| TDCA                         | 0.005           | 0.002          | 0.004           | 0.0032          | 0.7411        | 0.9677        | 0.0018        |
| TMCA(a+b)                    | 0.013           | 0.001          | 0.013           | 0.0005          | 0.5602        | 0.9677        | 0.0000        |
| TUDCA                        | 0.004           | 0.000          | 0.004           | 0.0002          | 0.5602        | 0.9677        | 0.0000        |
| UDCA                         | 0.006           | 0.005          | 0.006           | 0.0049          | 0.9255        | 0.9719        | 0.0021        |
| Dimethylamine                | 1.715           | 0.671          | 1.857           | 0.5870          | 0.4804        | 0.9677        | 0.0005        |
| <b>Acetone</b>               | <b>3.625</b>    | <b>2.520</b>   | <b>5.023</b>    | <b>2.2748</b>   | <b>0.0341</b> | <b>0.0704</b> | <b>0.0006</b> |
| Ascorbate                    | 142.965         | 30.960         | 140.855         | 15.3580         | 0.7863        | 0.9719        | 0.0019        |
| cis-Aconitate                | 2.990           | 0.896          | 2.740           | 0.9366          | 0.3937        | 0.9293        | 0.0771        |
| 2-Aminobutyrate              | 6.700           | 6.430          | 6.475           | 4.0182          | 0.8951        | 0.9719        | 0.0000        |
| 2-Hydroxybutyric acid        | 22.730          | 7.127          | 25.831          | 10.8912         | 0.2934        | 0.9270        | 0.0001        |
| <b>2-Hydroxyisovalerate</b>  | <b>3.845</b>    | <b>1.289</b>   | <b>4.648</b>    | <b>2.9030</b>   | <b>0.0265</b> | <b>0.0927</b> | <b>0.0000</b> |
| 2-Oxoglutarate               | 8.525           | 2.257          | 8.610           | 1.8284          | 0.8966        | 0.9719        | 0.1623        |
| <b>3-Hydroxybutyric acid</b> | <b>9.315</b>    | <b>3.745</b>   | <b>17.179</b>   | <b>10.5270</b>  | <b>0.0032</b> | <b>0.0477</b> | <b>0.0000</b> |
| 3-Hydroxyisobutyrate         | 11.140          | 2.568          | 12.105          | 6.6828          | 0.5502        | 0.9677        | 0.0000        |
| 3-Hydroxyisovalerate         | 3.600           | 1.421          | 3.140           | 1.4691          | 0.3205        | 0.9270        | 0.0001        |
| 3-Hydroxyisovaleric acid     | 3.675           | 1.226          | 3.090           | 1.5801          | 0.1988        | 0.9270        | 0.0203        |
| Acetic acid                  | 30.405          | 6.394          | 34.561          | 16.6800         | 0.3047        | 0.9270        | 0.0000        |
| Acetoacetate                 | 5.100           | 1.599          | 6.405           | 3.7859          | 0.1639        | 0.9270        | 0.0000        |
| <b>Citric acid</b>           | <b>147.975</b>  | <b>30.763</b>  | <b>168.096</b>  | <b>40.4322</b>  | <b>0.0446</b> | <b>0.0927</b> | <b>0.0683</b> |
| Formate                      | 30.155          | 4.720          | 30.107          | 6.9181          | 0.9795        | 0.9795        | 0.5875        |
| <b>L-Lactic acid</b>         | <b>1381.950</b> | <b>194.326</b> | <b>1511.529</b> | <b>241.0402</b> | <b>0.0397</b> | <b>0.0927</b> | <b>0.0274</b> |
| L-Phenylalanine              | 6.655           | 5.401          | 6.106           | 1.8693          | 0.6698        | 0.9677        | 0.0000        |
| Malonate                     | 8.285           | 1.993          | 7.770           | 2.3775          | 0.4624        | 0.9645        | 0.1187        |
| Pantothenate                 | 9.640           | 3.195          | 10.375          | 4.0676          | 0.5289        | 0.9677        | 0.0011        |

|                    |              |              |              |               |               |               |               |
|--------------------|--------------|--------------|--------------|---------------|---------------|---------------|---------------|
| Pyruvic acid       | 14.910       | 9.001        | 13.151       | 11.8267       | 0.5996        | 0.9677        | 0.0002        |
| Succinate          | 11.515       | 3.008        | 11.629       | 2.9807        | 0.9048        | 0.9719        | 0.3544        |
| Acetaminophen      | 4.075        | 4.376        | 2.780        | 0.9088        | 0.2029        | 0.9270        | 0.0000        |
| Choline            | 1.030        | 0.782        | 0.876        | 0.5128        | 0.4673        | 0.9645        | 0.0000        |
| lysoPC a C26:1     | 0.012        | 0.012        | 0.018        | 0.0128        | 0.1612        | 0.9270        | 0.0040        |
| lysoPC a C28:0     | 0.065        | 0.027        | 0.064        | 0.0389        | 0.9404        | 0.9719        | 0.0214        |
| lysoPC a C28:1     | 0.032        | 0.023        | 0.031        | 0.0206        | 0.9598        | 0.9719        | 0.0063        |
| <b>PC aa C28:1</b> | <b>0.027</b> | <b>0.011</b> | <b>0.033</b> | <b>0.0111</b> | <b>0.0452</b> | <b>0.0927</b> | <b>0.4571</b> |
| PC aa C30:0        | 0.134        | 0.028        | 0.146        | 0.0277        | 0.1740        | 0.9270        | 0.8363        |
| PC aa C32:0        | 0.818        | 0.213        | 0.845        | 0.2323        | 0.7035        | 0.9677        | 0.5175        |
| PC aa C32:1        | 0.330        | 0.084        | 0.337        | 0.1008        | 0.8044        | 0.9719        | 0.4761        |
| PC aa C32:2        | 0.018        | 0.012        | 0.015        | 0.0108        | 0.5170        | 0.9677        | 0.1322        |
| PC aa C34:1        | 4.576        | 1.234        | 4.822        | 1.3745        | 0.5542        | 0.9677        | 0.8106        |
| PC aa C34:2        | 1.051        | 0.100        | 1.030        | 0.1268        | 0.5684        | 0.9677        | 0.1387        |
| PC aa C34:4        | 0.014        | 0.005        | 0.011        | 0.0057        | 0.1671        | 0.9270        | 0.0009        |
| PC aa C36:0        | 0.179        | 0.037        | 0.175        | 0.0453        | 0.7069        | 0.9677        | 0.0730        |
| PC aa C36:1        | 0.620        | 0.182        | 0.640        | 0.1579        | 0.7148        | 0.9677        | 0.5553        |
| PC aa C36:2        | 0.556        | 0.180        | 0.532        | 0.1705        | 0.6701        | 0.9677        | 0.0000        |
| PC aa C36:4        | 0.480        | 0.170        | 0.410        | 0.1553        | 0.1822        | 0.9270        | 0.0688        |
| PC aa C36:5        | 0.037        | 0.025        | 0.029        | 0.0089        | 0.1861        | 0.9270        | 0.0000        |
| <b>PC aa C36:6</b> | <b>0.004</b> | <b>0.002</b> | <b>0.002</b> | <b>0.0025</b> | <b>0.0314</b> | <b>0.0704</b> | <b>0.0040</b> |
| PC aa C38:3        | 0.223        | 0.100        | 0.230        | 0.1000        | 0.8308        | 0.9719        | 0.2062        |
| PC aa C38:4        | 0.536        | 0.149        | 0.510        | 0.1584        | 0.5939        | 0.9677        | 0.9092        |
| PC aa C38:5        | 0.127        | 0.053        | 0.121        | 0.0475        | 0.7052        | 0.9677        | 0.0087        |
| PC aa C38:6        | 0.202        | 0.101        | 0.178        | 0.0690        | 0.3965        | 0.9293        | 0.0047        |
| <b>PC aa C40:3</b> | <b>0.010</b> | <b>0.007</b> | <b>0.011</b> | <b>0.0049</b> | <b>0.0292</b> | <b>0.0807</b> | <b>0.0058</b> |
| PC aa C40:4        | 0.047        | 0.018        | 0.053        | 0.0191        | 0.3788        | 0.9293        | 0.7605        |
| PC aa C40:5        | 0.035        | 0.021        | 0.032        | 0.0180        | 0.6235        | 0.9677        | 0.0730        |
| PC aa C40:6        | 0.240        | 0.053        | 0.239        | 0.0524        | 0.9313        | 0.9719        | 0.6780        |
| PC aa C42:2        | 0.020        | 0.008        | 0.023        | 0.0071        | 0.2349        | 0.9270        | 0.0201        |
| PC ae C30:1        | 0.006        | 0.004        | 0.006        | 0.0047        | 0.9112        | 0.9719        | 0.1486        |
| PC ae C32:1        | 0.054        | 0.021        | 0.056        | 0.0182        | 0.7506        | 0.9677        | 0.4956        |
| PC ae C32:2        | 0.015        | 0.008        | 0.015        | 0.0090        | 0.9697        | 0.9758        | 0.1011        |

|                 |              |              |              |               |               |               |               |
|-----------------|--------------|--------------|--------------|---------------|---------------|---------------|---------------|
| PC ae C34:0     | 0.028        | 0.011        | 0.027        | 0.0116        | 0.7954        | 0.9719        | 0.0389        |
| PC ae C34:1     | 0.188        | 0.051        | 0.210        | 0.0628        | 0.2487        | 0.9270        | 0.1776        |
| PC ae C34:2     | 0.155        | 0.065        | 0.168        | 0.0681        | 0.5553        | 0.9677        | 0.6378        |
| PC ae C34:3     | 0.021        | 0.005        | 0.020        | 0.0074        | 0.9016        | 0.9719        | 0.0274        |
| PC ae C36:1     | 0.466        | 0.039        | 0.462        | 0.0657        | 0.8232        | 0.9719        | 0.2501        |
| PC ae C36:2     | 0.114        | 0.014        | 0.115        | 0.0159        | 0.9327        | 0.9719        | 0.1051        |
| PC ae C36:3     | 0.030        | 0.013        | 0.031        | 0.0109        | 0.8053        | 0.9719        | 0.1187        |
| PC ae C36:4     | 0.057        | 0.022        | 0.056        | 0.0216        | 0.9425        | 0.9719        | 0.7605        |
| PC ae C36:5     | 0.046        | 0.017        | 0.048        | 0.0172        | 0.8135        | 0.9719        | 0.3319        |
| PC ae C38:0     | 0.018        | 0.005        | 0.017        | 0.0053        | 0.7536        | 0.9677        | 0.6015        |
| PC ae C38:1     | 0.136        | 0.027        | 0.132        | 0.0384        | 0.7060        | 0.9677        | 0.7290        |
| PC ae C38:2     | 0.092        | 0.016        | 0.089        | 0.0260        | 0.6908        | 0.9677        | 0.0680        |
| PC ae C38:3     | 0.091        | 0.008        | 0.092        | 0.0123        | 0.8464        | 0.9719        | 0.8713        |
| PC ae C38:4     | 0.044        | 0.019        | 0.049        | 0.0220        | 0.4320        | 0.9479        | 0.0006        |
| PC ae C38:5     | 0.060        | 0.021        | 0.052        | 0.0134        | 0.1317        | 0.9270        | 0.7289        |
| PC ae C38:6     | 0.021        | 0.012        | 0.023        | 0.0101        | 0.5451        | 0.9677        | 0.2839        |
| PC ae C40:1     | 0.021        | 0.007        | 0.018        | 0.0076        | 0.2343        | 0.9270        | 0.0007        |
| PC ae C40:2     | 0.036        | 0.005        | 0.036        | 0.0102        | 0.9538        | 0.9719        | 0.0000        |
| PC ae C40:3     | 0.044        | 0.013        | 0.042        | 0.0178        | 0.7532        | 0.9677        | 0.0001        |
| PC ae C40:4     | 0.031        | 0.010        | 0.035        | 0.0102        | 0.2087        | 0.9270        | 0.0326        |
| PC ae C40:6     | 0.019        | 0.008        | 0.020        | 0.0107        | 0.7634        | 0.9677        | 0.3932        |
| PC ae C44:6     | 0.009        | 0.007        | 0.011        | 0.0066        | 0.3983        | 0.9293        | 0.0463        |
| H1              | 11221.789    | 1777.259     | 10986.200    | 1744.8288     | 0.6786        | 0.9677        | 0.3275        |
| Xanthine        | 1.190        | 1.487        | 0.887        | 0.3147        | 0.3789        | 0.9293        | 0.0000        |
| SM (OH) C14:1   | 0.042        | 0.014        | 0.039        | 0.0145        | 0.5501        | 0.9677        | 0.0071        |
| SM (OH) C16:1   | 0.033        | 0.016        | 0.040        | 0.0180        | 0.1877        | 0.9270        | 0.0010        |
| SM (OH) C22:1   | 0.039        | 0.018        | 0.044        | 0.0252        | 0.5310        | 0.9677        | 0.0000        |
| SM (OH) C22:2   | 0.044        | 0.020        | 0.047        | 0.0302        | 0.7069        | 0.9677        | 0.0001        |
| SM C16:0        | 0.836        | 0.251        | 0.751        | 0.3113        | 0.3468        | 0.9277        | 0.3325        |
| SM C16:1        | 0.098        | 0.035        | 0.089        | 0.0306        | 0.4084        | 0.9393        | 0.0311        |
| SM C18:0        | 0.781        | 0.279        | 0.829        | 0.2542        | 0.5727        | 0.9677        | 0.2314        |
| SM C18:1        | 0.208        | 0.076        | 0.212        | 0.0579        | 0.8541        | 0.9719        | 0.1199        |
| <b>SM C20:2</b> | <b>0.001</b> | <b>0.002</b> | <b>0.004</b> | <b>0.0055</b> | <b>0.0454</b> | <b>0.6044</b> | <b>0.0000</b> |

|                 |              |              |              |               |               |               |               |
|-----------------|--------------|--------------|--------------|---------------|---------------|---------------|---------------|
| SM C24:0        | 0.145        | 0.057        | 0.139        | 0.0447        | 0.7266        | 0.9677        | 0.8723        |
| SM C24:1        | 0.464        | 0.164        | 0.486        | 0.1901        | 0.7006        | 0.9677        | 0.5975        |
| <b>SM C26:0</b> | <b>0.005</b> | <b>0.005</b> | <b>0.004</b> | <b>0.0030</b> | <b>0.0297</b> | <b>0.0704</b> | <b>0.0014</b> |
| SM C26:1        | 0.008        | 0.005        | 0.007        | 0.0037        | 0.3176        | 0.9270        | 0.0133        |
| Fructose        | 58.160       | 16.345       | 56.836       | 10.2266       | 0.7605        | 0.9677        | 0.0012        |
| Mannose         | 27.155       | 19.451       | 22.600       | 7.2744        | 0.3328        | 0.9270        | 0.0000        |
| Glycerol        | 153.965      | 40.720       | 154.871      | 46.8308       | 0.9483        | 0.9719        | 0.1398        |
| D-Glucose       | 2299.345     | 291.700      | 2231.196     | 190.3433      | 0.3871        | 0.9293        | 0.0482        |

**Table S4:** Results of the metabolite set enrichment analysis showing which metabolic pathways that were significantly perturbed in sPD CSF when compared to their corresponding controls.

| <b>Pathways</b>                        | <b>Total</b> | <b>Hits</b> | <b>p values</b> | <b>FDR</b> |
|----------------------------------------|--------------|-------------|-----------------|------------|
| Fatty Acid Biosynthesis                | 35           | 4           | 0.00184         | 0.0757     |
| Ethanol Degradation                    | 19           | 2           | 0.00574         | 0.0437     |
| Ketone Body Metabolism                 | 13           | 3           | 0.02987         | 0.0199     |
| Bile Acid Biosynthesis                 | 65           | 2           | 0.03259         | 0.0122     |
| Propionate Metabolism                  | 40           | 1           | 0.04492         | 0.0293     |
| Taurine and Hypotaurine Metabolism     | 19           | 2           | 0.04598         | 0.2989     |
| Inositol metabolism                    | 12           | 7           | 0.67286         | 0.2874     |
| Mitochondrial Electron Transport Chain | 60           | 1           | 0.07424         | 0.5794     |
| Carnitine Synthesis                    | 19           | 6           | 0.08783         | 0.0721     |
| D-Arginine and D-Ornithine Metabolism  | 22           | 6           | 0.08436         | 0.7010     |
| Methionine Metabolism                  | 11           | 6           | 0.08153         | 0.8209     |

**Table S5:** The mean concentrations of all identified and quantified metabolites for sPD and LRRK2 PD and their corresponding p-values and q-values. The metabolites highlighted in bold are those at significantly different concentrations.

\*Metabolites which were non-normally distributed p-values were calculated using the Shapiro–Wilk test.

| Label               | sPD            |                | LRRK2 PD       |                | Statistical Analysis |               |               |
|---------------------|----------------|----------------|----------------|----------------|----------------------|---------------|---------------|
|                     | Mean           | Std            | Mean           | Std            | t-TestPvalue         | Qvalue        | ShapiroPvalue |
| C0                  | 7.0735         | 2.9413         | 6.6645         | 2.3675         | 0.6309               | 0.8744        | 0.0026        |
| C10                 | 0.1424         | 0.0207         | 0.1381         | 0.0270         | 0.5750               | 0.8664        | 0.8078        |
| C10:2               | 0.0367         | 0.0097         | 0.0362         | 0.0100         | 0.8732               | 0.9704        | 0.3111        |
| C14:2-OH            | 0.0042         | 0.0036         | 0.0054         | 0.0038         | 0.3270               | 0.8664        | 0.0007        |
| C16-OH              | 0.0028         | 0.0028         | 0.0040         | 0.0029         | 0.2093               | 0.8664        | 0.0002        |
| C2                  | 1.6885         | 0.3387         | 1.6725         | 0.4125         | 0.8941               | 0.9779        | 0.3344        |
| C3                  | 0.1120         | 0.0383         | 0.1055         | 0.0296         | 0.5519               | 0.8664        | 0.1251        |
| C4                  | 0.1024         | 0.0249         | 0.0955         | 0.0317         | 0.4449               | 0.8664        | 0.0155        |
| C4:1                | 0.0207         | 0.0108         | 0.0201         | 0.0140         | 0.8800               | 0.9704        | 0.0102        |
| <b>C5</b>           | <b>0.0749</b>  | <b>0.0209</b>  | <b>0.0576</b>  | <b>0.0304</b>  | <b>0.0429</b>        | <b>0.8664</b> | <b>0.2108</b> |
| C5-DC (C6-OH)       | 0.0227         | 0.0126         | 0.0203         | 0.0116         | 0.5433               | 0.8664        | 0.0576        |
| C5-OH (C3-DC-M)     | 0.0611         | 0.0243         | 0.0575         | 0.0269         | 0.6638               | 0.8906        | 0.6819        |
| C7-DC               | 0.0069         | 0.0050         | 0.0058         | 0.0050         | 0.5110               | 0.8664        | 0.0090        |
| C9                  | 0.0242         | 0.0108         | 0.0216         | 0.0108         | 0.4600               | 0.8664        | 0.2138        |
| Dimethyl sulfone.1  | 12.3906        | 6.2499         | 15.4085        | 19.3427        | 0.5107               | 0.8664        | 0.0000        |
| Ethanol             | 73.2850        | 191.3642       | 23.3150        | 11.0145        | 0.2509               | 0.8664        | 0.0000        |
| Isopropyl alcohol   | 84.2593        | 361.9489       | 2.4065         | 0.8490         | 0.3182               | 0.8664        | 0.0000        |
| Methanol            | 378.3109       | 351.8160       | 716.3382       | 959.2531       | 0.1472               | 0.8664        | 0.0000        |
| Propylene glycol    | 0.8018         | 2.0735         | 0.2827         | 0.1785         | 0.2717               | 0.8664        | 0.0000        |
| Trp                 | 3.5967         | 1.1350         | 3.8547         | 1.3585         | 0.5185               | 0.8664        | 0.5216        |
| <b>Myo-inositol</b> | <b>94.4813</b> | <b>19.0134</b> | <b>85.5548</b> | <b>10.1697</b> | <b>0.0719</b>        | <b>0.8664</b> | <b>0.0042</b> |
| Creatine            | 33.1458        | 5.3577         | 33.1441        | 5.5023         | 0.9992               | 1.0000        | 0.2188        |
| Creatinine          | 67.7800        | 12.5600        | 70.5550        | 12.8231        | 0.4935               | 0.8664        | 0.2697        |
| Dopamine            | 0.0118         | 0.0061         | 0.0131         | 0.0089         | 0.5785               | 0.8664        | 0.0013        |



|                   |                |               |                |               |               |               |               |
|-------------------|----------------|---------------|----------------|---------------|---------------|---------------|---------------|
| Histamine         | 5.7097         | 6.7862        | 5.5947         | 5.1046        | 0.9520        | 0.9907        | 0.0000        |
| <b>Putrescine</b> | <b>0.1623</b>  | <b>0.0546</b> | <b>0.2047</b>  | <b>0.0685</b> | <b>0.0368</b> | <b>0.8664</b> | <b>0.0557</b> |
| Sarcosine         | 1.6652         | 0.7586        | 1.7607         | 0.8325        | 0.7068        | 0.9288        | 0.0001        |
| SDMA              | 0.1581         | 0.0306        | 0.1569         | 0.0423        | 0.9186        | 0.9794        | 0.0608        |
| t4-OH-Pro         | 0.6462         | 0.1985        | 0.6662         | 0.1598        | 0.7269        | 0.9288        | 0.3661        |
| Taurine           | 7.7835         | 2.2162        | 8.7800         | 1.9925        | 0.1431        | 0.8664        | 0.0096        |
| Pyroglutamic acid | 69.6680        | 15.3749       | 69.7420        | 13.0648       | 0.9870        | 0.9994        | 0.8993        |
| Urea              | 135.7073       | 69.3058       | 120.8357       | 61.0592       | 0.4759        | 0.8664        | 0.0000        |
| Ala               | 36.8850        | 15.2885       | 37.6600        | 14.9355       | 0.8720        | 0.9704        | 0.0002        |
| Arg               | 23.6100        | 5.1290        | 25.6650        | 6.4101        | 0.2700        | 0.8664        | 0.7420        |
| Asn               | 7.8325         | 1.7213        | 8.3735         | 1.2159        | 0.2581        | 0.8664        | 0.0608        |
| Asp               | 28.3042        | 82.0962       | 7.1347         | 6.9215        | 0.2701        | 0.8664        | 0.0000        |
| Gln               | 737.2500       | 341.3445      | 878.7000       | 424.5502      | 0.2528        | 0.8664        | 0.0000        |
| Gly               | 12.6300        | 22.3671       | 8.7725         | 2.6470        | 0.4484        | 0.8664        | 0.0000        |
| His               | 17.2143        | 7.1285        | 18.3783        | 4.9689        | 0.5527        | 0.8664        | 0.0000        |
| Leu               | 17.3475        | 6.6228        | 15.5565        | 5.7362        | 0.3664        | 0.8664        | 0.0002        |
| L-Glutamine       | 47.3677        | 13.9630       | 54.6631        | 16.9382       | 0.1455        | 0.8664        | 0.3612        |
| Lys               | 39.4900        | 7.9216        | 38.3050        | 8.0157        | 0.6409        | 0.8744        | 0.5335        |
| Met               | 4.0790         | 1.1650        | 4.4695         | 1.1211        | 0.2869        | 0.8664        | 0.0008        |
| Orn               | 7.6535         | 10.4987       | 6.3245         | 1.9638        | 0.5812        | 0.8664        | 0.0000        |
| <b>Ser</b>        | <b>27.2000</b> | <b>8.4121</b> | <b>34.0950</b> | <b>6.4972</b> | <b>0.0062</b> | <b>0.8664</b> | <b>0.0082</b> |
| Thr               | 37.3150        | 10.9019       | 39.6450        | 7.2261        | 0.4306        | 0.8664        | 0.7975        |
| Trp               | 2.5440         | 0.9251        | 2.4530         | 0.5168        | 0.7031        | 0.9288        | 0.0000        |
| Tyr               | 10.0125        | 3.2771        | 12.3845        | 4.6551        | 0.0702        | 0.8664        | 0.0003        |
| Val               | 20.4150        | 6.9983        | 19.1400        | 6.7664        | 0.5615        | 0.8664        | 0.0135        |
| Ile               | 6.4525         | 3.3387        | 5.8129         | 3.7693        | 0.5733        | 0.8664        | 0.0000        |
| CA                | 0.0133         | 0.0124        | 0.0115         | 0.0122        | 0.6366        | 0.8744        | 0.0001        |
| CDCA              | 0.0122         | 0.0125        | 0.0130         | 0.0141        | 0.8503        | 0.9704        | 0.0000        |
| DCA               | 0.0199         | 0.0199        | 0.0319         | 0.0317        | 0.1596        | 0.8664        | 0.0000        |
| GCA               | 0.0007         | 0.0017        | 0.0035         | 0.0129        | 0.3435        | 0.8664        | 0.0000        |
| GCDCA             | 0.0102         | 0.0055        | 0.0163         | 0.0180        | 0.1558        | 0.8664        | 0.0000        |
| GDCA              | 0.0024         | 0.0026        | 0.0048         | 0.0067        | 0.1342        | 0.8664        | 0.0000        |
| GUDCA             | 0.0021         | 0.0009        | 0.0019         | 0.0016        | 0.6277        | 0.8744        | 0.0000        |

|                              |                |                |                |               |               |               |               |
|------------------------------|----------------|----------------|----------------|---------------|---------------|---------------|---------------|
| HDCA                         | 0.0039         | 0.0051         | 0.0035         | 0.0036        | 0.7772        | 0.9329        | 0.0000        |
| LCA                          | 0.0002         | 0.0009         | 0.0010         | 0.0025        | 0.2179        | 0.8664        | 0.0000        |
| MCA(b)                       | 0.0002         | 0.0007         | 0.0004         | 0.0007        | 0.3639        | 0.8664        | 0.0000        |
| MCA(o)                       | 0.0019         | 0.0029         | 0.0011         | 0.0018        | 0.3331        | 0.8664        | 0.0000        |
| <b>TCA</b>                   | <b>0.0000</b>  | <b>0.0000</b>  | <b>0.0009</b>  | <b>0.0019</b> | <b>0.0493</b> | <b>0.8664</b> | <b>0.0000</b> |
| TCDCa                        | 0.0027         | 0.0013         | 0.0022         | 0.0013        | 0.2415        | 0.8664        | 0.0186        |
| TDCA                         | 0.0045         | 0.0032         | 0.0055         | 0.0029        | 0.3066        | 0.8664        | 0.0043        |
| TMCA(a+b)                    | 0.0133         | 0.0005         | 0.0134         | 0.0006        | 0.5602        | 0.8664        | 0.0000        |
| TUDCA                        | 0.0041         | 0.0002         | 0.0041         | 0.0003        | 0.5602        | 0.8664        | 0.0000        |
| UDCA                         | 0.0057         | 0.0049         | 0.0087         | 0.0061        | 0.0890        | 0.8664        | 0.0198        |
| Dimethylamine                | 1.8570         | 0.5870         | 1.8716         | 1.4451        | 0.9669        | 0.9907        | 0.0000        |
| Acetone                      | 5.0226         | 2.2748         | 4.3898         | 1.9333        | 0.3492        | 0.8664        | 0.0091        |
| Ascorbate                    | 140.8550       | 15.3580        | 145.3800       | 24.7369       | 0.4913        | 0.8664        | 0.0458        |
| cis-Aconitate                | 2.7400         | 0.9366         | 3.1750         | 1.0672        | 0.1787        | 0.8664        | 0.0543        |
| 2-Aminobutyrate              | 6.4750         | 4.0182         | 5.3400         | 3.6151        | 0.3536        | 0.8664        | 0.0009        |
| <b>2-Hydroxybutyric acid</b> | <b>25.8306</b> | <b>10.8912</b> | <b>20.4286</b> | <b>6.0432</b> | <b>0.0599</b> | <b>0.8664</b> | <b>0.0000</b> |
| 2-Hydroxyisovalerate         | 4.6485         | 2.9030         | 3.9484         | 2.5522        | 0.4230        | 0.8664        | 0.0000        |
| 2-Oxoglutarate               | 8.6100         | 1.8284         | 8.1750         | 1.6714        | 0.4371        | 0.8664        | 0.0015        |
| <b>3-Hydroxybutyric acid</b> | <b>17.1790</b> | <b>10.5270</b> | <b>12.6481</b> | <b>4.0959</b> | <b>0.0808</b> | <b>0.8664</b> | <b>0.0000</b> |
| 3-Hydroxyisobutyrate         | 12.1050        | 6.6828         | 9.4800         | 2.6957        | 0.1116        | 0.8664        | 0.0000        |
| 3-Hydroxyisovalerate         | 3.1400         | 1.4691         | 2.8300         | 1.3967        | 0.4982        | 0.8664        | 0.0001        |
| 3-Hydroxyisovaleric acid     | 3.0902         | 1.5801         | 2.9603         | 1.5409        | 0.7938        | 0.9329        | 0.0006        |
| Acetic acid                  | 34.5609        | 16.6800        | 30.1263        | 4.6454        | 0.2592        | 0.8664        | 0.0000        |
| Acetoacetate                 | 6.4045         | 3.7859         | 5.6779         | 1.4719        | 0.4287        | 0.8664        | 0.0000        |
| Citric acid                  | 168.0960       | 40.4322        | 157.3319       | 30.6221       | 0.3486        | 0.8664        | 0.2676        |
| Formate                      | 30.1066        | 6.9181         | 29.9754        | 7.3111        | 0.9538        | 0.9907        | 0.0001        |
| L-Lactic acid                | 1511.5289      | 241.0402       | 1537.9513      | 361.6891      | 0.7872        | 0.9329        | 0.0009        |
| L-Phenylalanine              | 6.1058         | 1.8693         | 5.9951         | 1.6860        | 0.8451        | 0.9704        | 0.3915        |
| Malonate                     | 7.7700         | 2.3775         | 8.6400         | 2.7708        | 0.2933        | 0.8664        | 0.0301        |
| Pantothenate                 | 10.3750        | 4.0676         | 8.8250         | 2.8711        | 0.1719        | 0.8664        | 0.0002        |
| Pyruvic acid                 | 13.1507        | 11.8267        | 17.2167        | 15.9741       | 0.3660        | 0.8664        | 0.0000        |
| Succinate                    | 11.6290        | 2.9807         | 11.5770        | 3.2635        | 0.9584        | 0.9907        | 0.2807        |
| Acetaminophen                | 2.7800         | 0.9088         | 3.7200         | 2.7152        | 0.1503        | 0.8664        | 0.0000        |

|                |        |        |        |        |        |        |        |
|----------------|--------|--------|--------|--------|--------|--------|--------|
| Choline        | 0.8764 | 0.5128 | 1.1353 | 0.6049 | 0.1526 | 0.8664 | 0.0004 |
| lysoPC a C26:1 | 0.0180 | 0.0128 | 0.0106 | 0.0110 | 0.0580 | 0.8664 | 0.0025 |
| lysoPC a C28:0 | 0.0644 | 0.0389 | 0.0716 | 0.0197 | 0.4649 | 0.8664 | 0.0161 |
| lysoPC a C28:1 | 0.0312 | 0.0206 | 0.0249 | 0.0209 | 0.3390 | 0.8664 | 0.0042 |
| PC aa C28:1    | 0.0334 | 0.0111 | 0.0352 | 0.0134 | 0.6369 | 0.8744 | 0.0545 |
| PC aa C30:0    | 0.1464 | 0.0277 | 0.1493 | 0.0315 | 0.7632 | 0.9329 | 0.3664 |
| PC aa C32:0    | 0.8451 | 0.2323 | 0.9194 | 0.2079 | 0.2929 | 0.8664 | 0.3789 |
| PC aa C32:1    | 0.3373 | 0.1008 | 0.3625 | 0.0942 | 0.4190 | 0.8664 | 0.4653 |
| PC aa C32:2    | 0.0152 | 0.0108 | 0.0161 | 0.0112 | 0.7868 | 0.9329 | 0.0415 |
| PC aa C34:1    | 4.8220 | 1.3745 | 5.2595 | 1.5108 | 0.3442 | 0.8664 | 0.7635 |
| PC aa C34:2    | 1.0301 | 0.1268 | 1.0176 | 0.1563 | 0.7836 | 0.9329 | 0.3301 |
| PC aa C34:4    | 0.0112 | 0.0057 | 0.0128 | 0.0067 | 0.4204 | 0.8664 | 0.0073 |
| PC aa C36:0    | 0.1745 | 0.0453 | 0.1760 | 0.0326 | 0.9050 | 0.9779 | 0.5272 |
| PC aa C36:1    | 0.6396 | 0.1579 | 0.7109 | 0.1911 | 0.2060 | 0.8664 | 0.7257 |
| PC aa C36:2    | 0.5325 | 0.1705 | 0.6017 | 0.2339 | 0.2915 | 0.8664 | 0.0001 |
| PC aa C36:4    | 0.4103 | 0.1553 | 0.4570 | 0.1830 | 0.3892 | 0.8664 | 0.0020 |
| PC aa C36:5    | 0.0288 | 0.0089 | 0.0309 | 0.0096 | 0.4896 | 0.8664 | 0.0002 |
| PC aa C36:6    | 0.0023 | 0.0025 | 0.0030 | 0.0025 | 0.3822 | 0.8664 | 0.0003 |
| PC aa C38:3    | 0.2301 | 0.1000 | 0.2264 | 0.0918 | 0.9049 | 0.9779 | 0.0758 |
| PC aa C38:4    | 0.5103 | 0.1584 | 0.5464 | 0.1666 | 0.4868 | 0.8664 | 0.8618 |
| PC aa C38:5    | 0.1207 | 0.0475 | 0.1251 | 0.0525 | 0.7826 | 0.9329 | 0.0016 |
| PC aa C38:6    | 0.1785 | 0.0690 | 0.1975 | 0.0908 | 0.4596 | 0.8664 | 0.0086 |
| PC aa C40:3    | 0.0106 | 0.0049 | 0.0108 | 0.0068 | 0.9153 | 0.9794 | 0.0134 |
| PC aa C40:4    | 0.0525 | 0.0191 | 0.0535 | 0.0170 | 0.8690 | 0.9704 | 0.8632 |
| PC aa C40:5    | 0.0320 | 0.0180 | 0.0372 | 0.0175 | 0.3563 | 0.8664 | 0.3692 |
| PC aa C40:6    | 0.2388 | 0.0524 | 0.2528 | 0.0595 | 0.4345 | 0.8664 | 0.2029 |
| PC aa C42:2    | 0.0233 | 0.0071 | 0.0205 | 0.0059 | 0.1909 | 0.8664 | 0.0875 |
| PC ae C30:1    | 0.0064 | 0.0047 | 0.0072 | 0.0049 | 0.5999 | 0.8744 | 0.0356 |
| PC ae C32:1    | 0.0561 | 0.0182 | 0.0593 | 0.0204 | 0.6042 | 0.8744 | 0.6042 |
| PC ae C32:2    | 0.0154 | 0.0090 | 0.0138 | 0.0067 | 0.5268 | 0.8664 | 0.1032 |
| PC ae C34:0    | 0.0273 | 0.0116 | 0.0297 | 0.0102 | 0.4915 | 0.8664 | 0.0706 |
| PC ae C34:1    | 0.2096 | 0.0628 | 0.2084 | 0.0614 | 0.9516 | 0.9907 | 0.0349 |
| PC ae C34:2    | 0.1675 | 0.0681 | 0.1580 | 0.0586 | 0.6390 | 0.8744 | 0.1581 |

|                    |               |               |               |               |               |               |               |
|--------------------|---------------|---------------|---------------|---------------|---------------|---------------|---------------|
| PC ae C34:3        | 0.0204        | 0.0074        | 0.0200        | 0.0091        | 0.8798        | 0.9704        | 0.0293        |
| PC ae C36:1        | 0.4620        | 0.0657        | 0.4564        | 0.0679        | 0.7924        | 0.9329        | 0.7883        |
| PC ae C36:2        | 0.1146        | 0.0159        | 0.1105        | 0.0171        | 0.4313        | 0.8664        | 0.2061        |
| PC ae C36:3        | 0.0312        | 0.0109        | 0.0314        | 0.0145        | 0.9707        | 0.9907        | 0.3340        |
| PC ae C36:4        | 0.0560        | 0.0216        | 0.0535        | 0.0259        | 0.7376        | 0.9329        | 0.4804        |
| PC ae C36:5        | 0.0475        | 0.0172        | 0.0504        | 0.0207        | 0.6382        | 0.8744        | 0.0503        |
| PC ae C38:0        | 0.0174        | 0.0053        | 0.0159        | 0.0036        | 0.3013        | 0.8664        | 0.1380        |
| PC ae C38:1        | 0.1321        | 0.0384        | 0.1359        | 0.0292        | 0.7231        | 0.9288        | 0.5645        |
| PC ae C38:2        | 0.0895        | 0.0260        | 0.0870        | 0.0216        | 0.7430        | 0.9329        | 0.0813        |
| <b>PC ae C38:3</b> | <b>0.0915</b> | <b>0.0123</b> | <b>0.0824</b> | <b>0.0256</b> | <b>0.1604</b> | <b>0.8664</b> | <b>0.0001</b> |
| PC ae C38:4        | 0.0487        | 0.0220        | 0.0522        | 0.0241        | 0.6393        | 0.8744        | 0.0016        |
| PC ae C38:5        | 0.0515        | 0.0134        | 0.0550        | 0.0210        | 0.5336        | 0.8664        | 0.4485        |
| PC ae C38:6        | 0.0228        | 0.0101        | 0.0228        | 0.0123        | 1.0000        | 1.0000        | 0.9848        |
| PC ae C40:1        | 0.0183        | 0.0076        | 0.0203        | 0.0083        | 0.4439        | 0.8664        | 0.0388        |
| PC ae C40:2        | 0.0357        | 0.0102        | 0.0348        | 0.0064        | 0.7267        | 0.9288        | 0.0002        |
| PC ae C40:3        | 0.0421        | 0.0178        | 0.0409        | 0.0134        | 0.8110        | 0.9408        | 0.0008        |
| <b>PC ae C40:4</b> | <b>0.0346</b> | <b>0.0102</b> | <b>0.0294</b> | <b>0.0081</b> | <b>0.0829</b> | <b>0.8664</b> | <b>0.4351</b> |
| PC ae C40:6        | 0.0203        | 0.0107        | 0.0218        | 0.0096        | 0.6550        | 0.8861        | 0.4112        |
| PC ae C44:6        | 0.0113        | 0.0066        | 0.0129        | 0.0040        | 0.3602        | 0.8664        | 0.0614        |
| H1                 | 10986.2000    | 1744.8288     | 13003.5000    | 2978.6285     | 0.0128        | 0.8664        | 0.0116        |
| <b>Xanthine</b>    | <b>0.8873</b> | <b>0.3147</b> | <b>0.7312</b> | <b>0.2114</b> | <b>0.0733</b> | <b>0.8664</b> | <b>0.1950</b> |
| SM (OH) C14:1      | 0.0394        | 0.0145        | 0.0449        | 0.0168        | 0.2791        | 0.8664        | 0.0052        |
| SM (OH) C16:1      | 0.0398        | 0.0180        | 0.0400        | 0.0182        | 0.9723        | 0.9907        | 0.0113        |
| SM (OH) C22:1      | 0.0437        | 0.0252        | 0.0421        | 0.0161        | 0.8122        | 0.9408        | 0.0000        |
| SM (OH) C22:2      | 0.0471        | 0.0302        | 0.0574        | 0.0312        | 0.2954        | 0.8664        | 0.0003        |
| SM C16:0           | 0.7507        | 0.3113        | 0.9141        | 0.3458        | 0.1246        | 0.8664        | 0.3318        |
| SM C16:1           | 0.0893        | 0.0306        | 0.1068        | 0.0358        | 0.1042        | 0.8664        | 0.0522        |
| SM C18:0           | 0.8288        | 0.2542        | 0.9453        | 0.3274        | 0.2164        | 0.8664        | 0.4795        |
| SM C18:1           | 0.2124        | 0.0579        | 0.2346        | 0.0755        | 0.3036        | 0.8664        | 0.2905        |
| SM C20:2           | 0.0038        | 0.0055        | 0.0025        | 0.0035        | 0.3981        | 0.8664        | 0.0000        |
| SM C24:0           | 0.1390        | 0.0447        | 0.1339        | 0.0588        | 0.7614        | 0.9329        | 0.8559        |
| SM C24:1           | 0.4857        | 0.1901        | 0.5088        | 0.2016        | 0.7108        | 0.9288        | 0.1291        |
| SM C26:0           | 0.0040        | 0.0030        | 0.0051        | 0.0030        | 0.2588        | 0.8664        | 0.1191        |

|           |           |          |           |          |        |        |        |
|-----------|-----------|----------|-----------|----------|--------|--------|--------|
| SM C26:1  | 0.0070    | 0.0037   | 0.0079    | 0.0061   | 0.5760 | 0.8664 | 0.0038 |
| Fructose  | 56.8362   | 10.2266  | 61.4039   | 16.6400  | 0.3022 | 0.8664 | 0.0230 |
| Mannose   | 22.5995   | 7.2744   | 24.3184   | 8.3913   | 0.4930 | 0.8664 | 0.0029 |
| Glycerol  | 154.8710  | 46.8308  | 175.2335  | 57.0755  | 0.2250 | 0.8664 | 0.5937 |
| D-Glucose | 2231.1958 | 190.3433 | 2333.5176 | 349.5871 | 0.2575 | 0.8664 | 0.0634 |

**Table 6:** Results of the metabolite set enrichment analysis showing which metabolic pathways that were significantly perturbed when LRRK2 PD and sPD CSF where compared.

| <b>Pathways</b>                            | <b>Total</b> | <b>Hits</b> | <b>p values</b> | <b>FDR</b> |
|--------------------------------------------|--------------|-------------|-----------------|------------|
| Propionate metabolism                      | 42           | 3           | 0.00192         | 0.05437    |
| Inositol metabolism                        | 33           | 1           | 0.00367         | 0.05249    |
| Inositol phosphate metabolism              | 26           | 1           | 0.02359         | 0.04375    |
| Phosphatidylinositol Phosphate Metabolism  | 17           | 1           | 0.02883         | 0.12154    |
| Valine, Leucine and Isoleucine Degradation | 60           | 7           | 0.00308         | 0.04578    |
| Beta-Alanine Metabolism                    | 34           | 4           | 0.01144         | 0.25625    |
| Tyrosine metabolism                        | 72           | 6           | 0.04769         | 0.18840    |
| Phytanic Acid Peroxisomal Oxidation        | 26           | 3           | 0.01161         | 0.3128     |
| Lysine degradation                         | 30           | 2           | 0.02845         | 0.8493     |
| Phenylalanine and Tyrosine Metabolism      | 19           | 6           | 0.05129         | 0.7856     |

**Table S7:** The mean concentrations of all identified and quantified metabolites for sPD controls and LRRK2 PD controls and their corresponding p-values and q-values. The metabolites highlighted in bold are those at significantly different concentrations.

\*Metabolites which were non-normally distributed p-values were calculated using the Shapiro–Wilk test.

| Label              | sPD Control |          | LRRK2 Control |         | Statistical Analysis |        |               |
|--------------------|-------------|----------|---------------|---------|----------------------|--------|---------------|
|                    | Mean        | Std      | Mean          | Std     | t-testPvalue         | Qvalue | ShapiroPvalue |
| C0                 | 7.516       | 1.5372   | 7.564         | 0.792   | 0.9008               | 0.9661 | 0.5           |
| C10                | 0.152       | 0.0268   | 0.146         | 0.027   | 0.4567               | 0.9159 | 0.232         |
| C10:2              | 0.035       | 0.0069   | 0.036         | 0.009   | 0.7060               | 0.9509 | 0.9064        |
| C14:2-OH           | 0.006       | 0.0034   | 0.005         | 0.003   | 0.4044               | 0.8799 | 0.0101        |
| C16-OH             | 0.003       | 0.0039   | 0.006         | 0.003   | 0.80                 | 0.4313 | 0.41          |
| C2                 | 1.511       | 0.2619   | 1.723         | 0.261   | 0.0144               | 0.4894 | 0.6029        |
| C3                 | 0.114       | 0.0260   | 0.116         | 0.022   | 0.7961               | 0.9657 | 0.6224        |
| C4                 | 0.099       | 0.0228   | 0.097         | 0.030   | 0.8097               | 0.9657 | 0.2           |
| C4:1               | 0.019       | 0.0121   | 0.024         | 0.010   | 0.1786               | 0.8709 | 0.3038        |
| C5                 | 0.070       | 0.0194   | 0.085         | 0.115   | 0.5696               | 0.9356 | 0.1000        |
| C5-DC (C6-OH)      | 0.022       | 0.0113   | 0.025         | 0.013   | 0.4891               | 0.9263 | 0.1289        |
| C5-OH (C3-DC-M)    | 0.062       | 0.0192   | 0.068         | 0.028   | 0.4790               | 0.9199 | 0.9311        |
| C7-DC              | 0.009       | 0.0048   | 0.008         | 0.005   | 0.4226               | 0.8836 | 0.174         |
| C9                 | 0.022       | 0.0079   | 0.027         | 0.008   | 0.308                | 0.4965 | 0.9558        |
| Dimethyl sulfone.1 | 9.335       | 5.9744   | 9.115         | 4.909   | 0.8993               | 0.9661 | 0.1           |
| Ethanol            | 18.280      | 9.9662   | 61.915        | 79.371  | 0.195                | 0.4894 | 0.4           |
| Isopropyl alcohol  | 1.770       | 0.7533   | 7.582         | 12.340  | 0.422                | 0.6176 | 0.5           |
| Methanol           | 225.355     | 274.3413 | 432.830       | 372.705 | 0.521                | 0.6230 | 0.06          |
| Propylene glycol   | 0.435       | 0.7604   | 0.173         | 0.208   | 0.1451               | 0.8709 | 0.07          |
| Trp                | 5.260       | 6.1949   | 3.776         | 0.929   | 0.2960               | 0.8709 | 0.05          |
| Myo-inositol       | 87.670      | 17.2845  | 85.362        | 19.619  | 0.6952               | 0.9509 | 0.1941        |
| Creatine           | 31.525      | 4.1801   | 31.926        | 5.792   | 0.8031               | 0.9657 | 0.1321        |
| Creatinine         | 68.340      | 9.8205   | 71.960        | 12.194  | 0.3077               | 0.8709 | 0.7975        |
| Dopamine           | 0.010       | 0.0048   | 0.008         | 0.006   | 0.2083               | 0.8709 | 0.0003        |
| Histamine          | 3.270       | 2.6477   | 5.450         | 5.041   | 0.0950               | 0.8496 | 0.098         |
| Putrescine         | 0.133       | 0.0481   | 0.132         | 0.034   | 0.9457               | 0.9761 | 0.1750        |
| Sarcosine          | 1.620       | 0.5175   | 1.453         | 0.451   | 0.2814               | 0.8709 | 0.0481        |

|                   |         |          |         |         |        |        |        |
|-------------------|---------|----------|---------|---------|--------|--------|--------|
| SDMA              | 0.156   | 0.0392   | 0.149   | 0.041   | 0.5624 | 0.9356 | 0.0322 |
| t4-OH-Pro         | 0.672   | 0.3109   | 0.680   | 0.217   | 0.9192 | 0.9661 | 0.055  |
| Taurine           | 8.497   | 1.7849   | 9.239   | 1.952   | 0.2173 | 0.8709 | 0.4459 |
| Pyroglutamic acid | 67.730  | 17.3315  | 60.091  | 13.730  | 0.1306 | 0.8709 | 0.7917 |
| Urea              | 305.365 | 614.6968 | 152.363 | 71.706  | 0.2758 | 0.8709 | 0.2083 |
| Ala               | 35.520  | 9.3886   | 77.585  | 201.086 | 0.3559 | 0.8709 | 0.3077 |
| Arg               | 24.070  | 4.0879   | 22.770  | 3.791   | 0.3036 | 0.8709 | 0.3917 |
| Asn               | 7.359   | 1.3151   | 7.012   | 1.212   | 0.3917 | 0.8757 | 0.3940 |
| Asp               | 13.047  | 11.1143  | 10.552  | 16.103  | 0.5851 | 0.9356 | 0.0000 |
| Gln               | 815.450 | 152.4534 | 822.100 | 246.678 | 0.9189 | 0.9661 | 0.0007 |
| Gly               | 7.555   | 1.9849   | 7.933   | 2.011   | 0.5527 | 0.9356 | 0.9255 |
| His               | 13.427  | 6.0346   | 15.664  | 2.298   | 0.1297 | 0.8709 | 0.0000 |
| Leu               | 16.835  | 6.6081   | 14.919  | 4.419   | 0.2879 | 0.8709 | 0.0000 |
| L-Glutamine       | 50.365  | 17.1845  | 43.185  | 9.744   | 0.1124 | 0.8698 | 0.0040 |
| Lys               | 39.645  | 9.7674   | 38.275  | 8.878   | 0.6452 | 0.9358 | 0.0056 |
| Met               | 3.543   | 0.6141   | 3.704   | 0.746   | 0.4608 | 0.9159 | 0.4163 |
| Orn               | 5.255   | 1.3536   | 4.923   | 1.313   | 0.4353 | 0.8984 | 0.0599 |
| Ser               | 28.935  | 5.1213   | 30.985  | 6.428   | 0.2716 | 0.8709 | 0.4398 |
| Thr               | 32.600  | 7.9827   | 33.535  | 5.982   | 0.6774 | 0.9484 | 0.8142 |
| Trp               | 2.241   | 0.4498   | 2.276   | 0.615   | 0.8379 | 0.9661 | 0.0015 |
| Tyr               | 9.312   | 2.0266   | 9.493   | 2.568   | 0.8054 | 0.9657 | 0.0120 |
| Val               | 19.740  | 7.0516   | 18.470  | 5.216   | 0.5212 | 0.9356 | 0.0011 |
| Ile               | 7.900   | 3.7155   | 6.220   | 3.454   | 0.1468 | 0.8709 | 0.0008 |
| CA                | 0.010   | 0.0121   | 0.006   | 0.007   | 0.3104 | 0.8709 | 0.0000 |
| CDCA              | 0.010   | 0.0123   | 0.006   | 0.011   | 0.3468 | 0.8709 | 0.0000 |
| DCA               | 0.022   | 0.0147   | 0.014   | 0.014   | 0.1135 | 0.8698 | 0.0045 |
| GCA               | 0.002   | 0.0041   | 0.000   | 0.000   | 0.0929 | 0.8496 | 0.0000 |
| GCDCA             | 0.020   | 0.0179   | 0.009   | 0.006   | 0.0153 | 0.4894 | 0.0000 |
| GDCA              | 0.004   | 0.0049   | 0.002   | 0.002   | 0.1445 | 0.8709 | 0.0000 |
| GUDCA             | 0.002   | 0.0011   | 0.002   | 0.001   | 0.3580 | 0.8709 | 0.0000 |
| HDCA              | 0.004   | 0.0055   | 0.005   | 0.006   | 0.8488 | 0.9661 | 0.0000 |
| LCA               | 0.001   | 0.0028   | 0.001   | 0.003   | 0.9208 | 0.9661 | 0.0000 |
| MCA(b)            | 0.000   | 0.0002   | 0.000   | 0.000   | 1.0000 | 1.0000 | 0.0000 |

|                          |          |          |          |         |        |        |        |
|--------------------------|----------|----------|----------|---------|--------|--------|--------|
| MCA(o)                   | 0.001    | 0.0014   | 0.001    | 0.002   | 0.6981 | 0.9509 | 0.0000 |
| TCA                      | 0.000    | 0.0015   | 0.000    | 0.000   | 0.1785 | 0.8709 | 0.0000 |
| TCDCa                    | 0.002    | 0.0013   | 0.002    | 0.001   | 0.1982 | 0.8709 | 0.0051 |
| TDCA                     | 0.005    | 0.0024   | 0.005    | 0.003   | 0.9079 | 0.9661 | 0.0004 |
| TMCA(a+b)                | 0.013    | 0.0006   | 0.013    | 0.000   | 0.7739 | 0.9657 | 0.0000 |
| TUDCA                    | 0.004    | 0.0003   | 0.004    | 0.000   | 0.5602 | 0.9356 | 0.0000 |
| UDCA                     | 0.006    | 0.0052   | 0.007    | 0.006   | 0.3769 | 0.8709 | 0.0014 |
| Dimethylamine            | 1.715    | 0.6706   | 1.860    | 0.923   | 0.5717 | 0.9356 | 0.0000 |
| Acetone                  | 3.625    | 2.5196   | 4.619    | 2.222   | 0.1936 | 0.8709 | 0.0055 |
| Ascorbate                | 142.965  | 30.9602  | 138.140  | 21.415  | 0.5699 | 0.9356 | 0.0006 |
| cis-Aconitate            | 2.990    | 0.8955   | 2.890    | 1.021   | 0.7438 | 0.9657 | 0.4611 |
| 2-Aminobutyrate          | 6.700    | 6.4296   | 6.900    | 4.448   | 0.9095 | 0.9661 | 0.0000 |
| 2-Hydroxybutyric acid    | 22.730   | 7.1268   | 23.746   | 6.978   | 0.6514 | 0.9364 | 0.1215 |
| 2-Hydroxyisovalerate     | 3.845    | 1.2890   | 3.528    | 1.153   | 0.4179 | 0.8836 | 0.0884 |
| 2-Oxoglutarate           | 8.525    | 2.2574   | 7.735    | 2.126   | 0.2617 | 0.8709 | 0.5239 |
| 3-Hydroxybutyric acid    | 9.315    | 3.7445   | 17.606   | 11.586  | 0.929  | 0.4085 | 0.2173 |
| 3-Hydroxyisobutyrate     | 11.140   | 2.5683   | 10.180   | 2.112   | 0.2044 | 0.8709 | 0.9849 |
| 3-Hydroxyisovalerate     | 3.600    | 1.4209   | 2.950    | 1.094   | 0.1133 | 0.8698 | 0.0050 |
| 3-Hydroxyisovaleric acid | 3.675    | 1.2260   | 2.964    | 1.246   | 0.0769 | 0.7743 | 0.0442 |
| Acetic acid              | 30.405   | 6.3942   | 31.001   | 11.304  | 0.8385 | 0.9661 | 0.0004 |
| Acetoacetate             | 5.100    | 1.5990   | 5.590    | 1.603   | 0.3388 | 0.8709 | 0.2738 |
| Citric acid              | 147.975  | 30.7628  | 149.108  | 38.204  | 0.9183 | 0.9661 | 0.9521 |
| Formate                  | 30.155   | 4.7200   | 31.304   | 5.443   | 0.4800 | 0.9199 | 0.2143 |
| L-Lactic acid            | 1381.950 | 194.3256 | 1346.958 | 184.895 | 0.5631 | 0.9356 | 0.1838 |
| L-Phenylalanine          | 6.655    | 5.4009   | 5.931    | 1.583   | 0.5687 | 0.9356 | 0.0000 |
| Malonate                 | 8.285    | 1.9930   | 8.045    | 2.043   | 0.7090 | 0.9509 | 0.7850 |
| Pantothenate             | 9.640    | 3.1948   | 10.085   | 2.781   | 0.6412 | 0.9358 | 0.8148 |
| Pyruvic acid             | 14.910   | 9.0009   | 14.772   | 11.020  | 0.9656 | 0.9902 | 0.0002 |
| Succinate                | 11.515   | 3.0085   | 10.936   | 3.567   | 0.5821 | 0.9356 | 0.0142 |
| Acetaminophen            | 4.075    | 4.3764   | 3.215    | 2.714   | 0.4597 | 0.9159 | 0.0000 |
| Choline                  | 1.030    | 0.7821   | 0.830    | 0.484   | 0.3370 | 0.8709 | 0.0000 |
| lysoPC a C26:1           | 0.012    | 0.0122   | 0.011    | 0.013   | 0.8199 | 0.9661 | 0.0001 |
| lysoPC a C28:0           | 0.065    | 0.0274   | 0.068    | 0.028   | 0.7147 | 0.9509 | 0.0289 |



|                |       |        |       |       |        |        |        |
|----------------|-------|--------|-------|-------|--------|--------|--------|
| lysoPC a C28:1 | 0.032 | 0.0230 | 0.025 | 0.021 | 0.3440 | 0.8709 | 0.0024 |
| PC aa C28:1    | 0.027 | 0.0110 | 0.031 | 0.010 | 0.1655 | 0.8709 | 0.3275 |
| PC aa C30:0    | 0.134 | 0.0284 | 0.145 | 0.035 | 0.2960 | 0.8709 | 0.7068 |
| PC aa C32:0    | 0.818 | 0.2135 | 0.899 | 0.267 | 0.2953 | 0.8709 | 0.0800 |
| PC aa C32:1    | 0.330 | 0.0836 | 0.359 | 0.097 | 0.3134 | 0.8709 | 0.0185 |
| PC aa C32:2    | 0.018 | 0.0119 | 0.020 | 0.019 | 0.6680 | 0.9434 | 0.0064 |
| PC aa C34:1    | 4.576 | 1.2343 | 5.053 | 1.501 | 0.2792 | 0.8709 | 0.3872 |
| PC aa C34:2    | 1.051 | 0.1003 | 1.115 | 0.104 | 0.0542 | 0.6230 | 0.2006 |
| PC aa C34:4    | 0.014 | 0.0048 | 0.014 | 0.004 | 0.6175 | 0.9356 | 0.1432 |
| PC aa C36:0    | 0.179 | 0.0369 | 0.175 | 0.031 | 0.6626 | 0.9434 | 0.1938 |
| PC aa C36:1    | 0.620 | 0.1822 | 0.672 | 0.178 | 0.3690 | 0.8709 | 0.8543 |
| PC aa C36:2    | 0.556 | 0.1799 | 0.548 | 0.148 | 0.8788 | 0.9661 | 0.0000 |
| PC aa C36:4    | 0.480 | 0.1704 | 0.463 | 0.188 | 0.7614 | 0.9657 | 0.0307 |
| PC aa C36:5    | 0.037 | 0.0248 | 0.034 | 0.008 | 0.6276 | 0.9356 | 0.0000 |
| PC aa C36:6    | 0.004 | 0.0022 | 0.003 | 0.002 | 0.3841 | 0.8709 | 0.1300 |
| PC aa C38:3    | 0.223 | 0.0999 | 0.223 | 0.090 | 0.9960 | 1.0000 | 0.4203 |
| PC aa C38:4    | 0.536 | 0.1491 | 0.547 | 0.186 | 0.8426 | 0.9661 | 0.3089 |
| PC aa C38:5    | 0.127 | 0.0527 | 0.130 | 0.052 | 0.8318 | 0.9661 | 0.0020 |
| PC aa C38:6    | 0.202 | 0.1010 | 0.187 | 0.073 | 0.5839 | 0.9356 | 0.0030 |
| PC aa C40:3    | 0.010 | 0.0068 | 0.013 | 0.006 | 0.1696 | 0.8709 | 0.0004 |
| PC aa C40:4    | 0.047 | 0.0178 | 0.049 | 0.022 | 0.7922 | 0.9657 | 0.0806 |
| PC aa C40:5    | 0.035 | 0.0208 | 0.041 | 0.018 | 0.3509 | 0.8709 | 0.5058 |
| PC aa C40:6    | 0.240 | 0.0532 | 0.231 | 0.043 | 0.5413 | 0.9356 | 0.0415 |
| PC aa C42:2    | 0.020 | 0.0083 | 0.021 | 0.007 | 0.7609 | 0.9657 | 0.0233 |
| PC ae C30:1    | 0.006 | 0.0037 | 0.006 | 0.003 | 0.8578 | 0.9661 | 0.5005 |
| PC ae C32:1    | 0.054 | 0.0212 | 0.058 | 0.024 | 0.6237 | 0.9356 | 0.1751 |
| PC ae C32:2    | 0.015 | 0.0075 | 0.016 | 0.008 | 0.9023 | 0.9661 | 0.2569 |
| PC ae C34:0    | 0.028 | 0.0114 | 0.030 | 0.013 | 0.6411 | 0.9358 | 0.0689 |
| PC ae C34:1    | 0.188 | 0.0507 | 0.202 | 0.063 | 0.4712 | 0.9199 | 0.3594 |
| PC ae C34:2    | 0.155 | 0.0647 | 0.157 | 0.057 | 0.9241 | 0.9661 | 0.3899 |
| PC ae C34:3    | 0.021 | 0.0051 | 0.019 | 0.008 | 0.3563 | 0.8709 | 0.1042 |
| PC ae C36:1    | 0.466 | 0.0392 | 0.493 | 0.048 | 0.0593 | 0.6363 | 0.3073 |
| PC ae C36:2    | 0.114 | 0.0138 | 0.123 | 0.011 | 0.0289 | 0.4965 | 0.1352 |

|               |           |           |           |          |        |        |        |
|---------------|-----------|-----------|-----------|----------|--------|--------|--------|
| PC ae C36:3   | 0.030     | 0.0132    | 0.032     | 0.012    | 0.6224 | 0.9356 | 0.0611 |
| PC ae C36:4   | 0.057     | 0.0219    | 0.059     | 0.021    | 0.7723 | 0.9657 | 0.3573 |
| PC ae C36:5   | 0.046     | 0.0174    | 0.050     | 0.020    | 0.4954 | 0.9273 | 0.0529 |
| PC ae C38:0   | 0.018     | 0.0047    | 0.019     | 0.006    | 0.5657 | 0.9356 | 0.0333 |
| PC ae C38:1   | 0.136     | 0.0272    | 0.159     | 0.021    | 0.0051 | 0.4085 | 0.6541 |
| PC ae C38:2   | 0.092     | 0.0162    | 0.100     | 0.022    | 0.2006 | 0.8709 | 0.1784 |
| PC ae C38:3   | 0.091     | 0.0083    | 0.099     | 0.012    | 0.0213 | 0.4894 | 0.0784 |
| PC ae C38:4   | 0.044     | 0.0189    | 0.046     | 0.020    | 0.7116 | 0.9509 | 0.0020 |
| PC ae C38:5   | 0.060     | 0.0207    | 0.066     | 0.022    | 0.3971 | 0.8757 | 0.3228 |
| PC ae C38:6   | 0.021     | 0.0121    | 0.019     | 0.011    | 0.6226 | 0.9356 | 0.2144 |
| PC ae C40:1   | 0.021     | 0.0073    | 0.021     | 0.008    | 0.7960 | 0.9657 | 0.0002 |
| PC ae C40:2   | 0.036     | 0.0053    | 0.040     | 0.006    | 0.0297 | 0.4965 | 0.6088 |
| PC ae C40:3   | 0.044     | 0.0127    | 0.046     | 0.015    | 0.6028 | 0.9356 | 0.0002 |
| PC ae C40:4   | 0.031     | 0.0095    | 0.032     | 0.013    | 0.7978 | 0.9657 | 0.0296 |
| PC ae C40:6   | 0.019     | 0.0078    | 0.022     | 0.008    | 0.3235 | 0.8709 | 0.7153 |
| PC ae C44:6   | 0.009     | 0.0067    | 0.012     | 0.005    | 0.2405 | 0.8709 | 0.0128 |
| H1            | 11221.789 | 1777.2594 | 11859.250 | 2441.678 | 0.3594 | 0.8709 | 0.9460 |
| Xanthine      | 1.190     | 1.4875    | 0.859     | 0.229    | 0.3316 | 0.8709 | 0.0000 |
| SM (OH) C14:1 | 0.042     | 0.0143    | 0.039     | 0.012    | 0.4129 | 0.8836 | 0.1699 |
| SM (OH) C16:1 | 0.033     | 0.0157    | 0.037     | 0.012    | 0.3293 | 0.8709 | 0.0618 |
| SM (OH) C22:1 | 0.039     | 0.0176    | 0.035     | 0.008    | 0.3461 | 0.8709 | 0.0000 |
| SM (OH) C22:2 | 0.044     | 0.0197    | 0.043     | 0.020    | 0.8993 | 0.9661 | 0.0003 |
| SM C16:0      | 0.836     | 0.2512    | 0.807     | 0.274    | 0.7274 | 0.9600 | 0.4431 |
| SM C16:1      | 0.098     | 0.0347    | 0.089     | 0.029    | 0.3755 | 0.8709 | 0.1779 |
| SM C18:0      | 0.781     | 0.2787    | 0.825     | 0.246    | 0.6018 | 0.9356 | 0.2159 |
| SM C18:1      | 0.208     | 0.0758    | 0.209     | 0.067    | 0.9947 | 1.0000 | 0.2648 |
| SM C20:2      | 0.001     | 0.0020    | 0.001     | 0.002    | 0.9425 | 0.9761 | 0.0000 |
| SM C24:0      | 0.145     | 0.0569    | 0.123     | 0.048    | 0.2120 | 0.8709 | 0.1456 |
| SM C24:1      | 0.464     | 0.1639    | 0.453     | 0.122    | 0.8075 | 0.9657 | 0.8488 |
| SM C26:0      | 0.005     | 0.0053    | 0.006     | 0.003    | 0.9719 | 0.9904 | 0.0067 |
| SM C26:1      | 0.008     | 0.0047    | 0.006     | 0.006    | 0.1300 | 0.8709 | 0.0298 |
| Fructose      | 58.160    | 16.3454   | 55.303    | 19.018   | 0.6134 | 0.9356 | 0.0034 |
| Mannose       | 27.155    | 19.4511   | 23.188    | 4.729    | 0.3811 | 0.8709 | 0.0000 |

|           |          |          |          |         |        |        |        |
|-----------|----------|----------|----------|---------|--------|--------|--------|
| Glycerol  | 153.965  | 40.7197  | 186.709  | 59.458  | 0.0492 | 0.6230 | 0.6138 |
| D-Glucose | 2299.345 | 291.7000 | 2165.120 | 380.751 | 0.2184 | 0.8709 | 0.0010 |

**Table S8:** Pair-wise partial least square discriminant (PLS-DA) model performance for LRKK2 control vs. LRKK2 PD sufferers, sPD controls vs. sPD sufferers and LRKK2 patients vs. sPD sufferers.

| <b>Models</b>           | <b>Sensitivity</b> | <b>Specificity</b> | <b>Significance</b> | <b>Accuracy</b> |
|-------------------------|--------------------|--------------------|---------------------|-----------------|
| LRKK2 vs. LRKK2 Control | 0.80               | 0.94               | 0.032               | 0.815           |
| sPD vs. sPD Control     | 0.75               | 0.76               | 0.435               | 0.713           |
| sPD vs. LRKK2           | 0.74               | 0.81               | 0.351               | 0.977           |

**Table S9:** Optimized model parameters for each machine learning algorithm evaluated for prediction of in this study.

| Models        | Optimized Parameters                                                                                                                                                                                                                                                                                                                                                                                         |
|---------------|--------------------------------------------------------------------------------------------------------------------------------------------------------------------------------------------------------------------------------------------------------------------------------------------------------------------------------------------------------------------------------------------------------------|
| logistic_reg  | steps=[('preprocess'", ' StandardScaler (copy=True', ' with_mean=True', ' with_std=True))', ('clf'", ' LogisticRegression(C=0.1', ' class_weight=None', ' dual=False', ' fit_intercept=True', ' intercept_scaling=1', ' max_iter=100', " multi_class='warn'", ' n_jobs=None', " penalty='l2'", ' random_state=42', " solver='lbfgs'", ' tol=0.0001', ' verbose=0', ' warm_start=False))]                     |
| svm_linear    | steps=[('preprocess'", ' StandardScaler(copy=True', ' with_mean=True', ' with_std=True))', (" ('clf'", ' SVC(C=0.001', ' cache_size=200', ' class_weight=None', ' coef0=0.0', " decision_function_shape='ovr'", ' degree=3', ' gamma='auto_deprecated'", " kernel='sigmoid'", ' max_iter=-1', ' probability=False', ' random_state=42', ' shrinking=True', ' tol=0.001', ' verbose=False)))]                 |
| knn           | steps=[('preprocess'", ' StandardScaler(copy=True', ' with_mean=True', ' with_std=True))', (" ('clf'", " KNeighborsClassifier(algorithm='auto'", ' leaf_size=30', " metric='minkowski'", ' metric_params=None', ' n_jobs=None', ' n_neighbors=3', ' p=2', " weights='uniform')"))]                                                                                                                           |
| gaussian      | steps=[('preprocess'", ' StandardScaler(copy=True', ' with_mean=True', ' with_std=True))', (" ('clf'", ' GaussianProcessClassifier(copy_X_train=True', ' kernel=None', ' max_iter_predict=100', " multi_class='one_vs_rest'", ' n_jobs=None', ' n_restarts_optimizer=0', " optimizer='fmin_l_bfgs_b'", ' random_state=None', ' warm_start=False)))]                                                          |
| svm kernel    | steps=[('preprocess'", ' StandardScaler(copy=True', ' with_mean=True', ' with_std=True))', (" ('clf'", ' BernoulliNB(alpha=0.25', ' binarize=0', ' class_prior=None', ' fit_prior=True)))]>]                                                                                                                                                                                                                 |
| Decision tree | DecisionTreeClassifier(class_weight=None', " criterion='gini'", ' max_depth=2', ' max_features=None', ' max_leaf_nodes=None', ' min_impurity_decrease=0.0', ' min_impurity_split=None', ' min_samples_leaf=1', ' min_samples_split=2', ' min_weight_fraction_leaf=0.0', ' presort=False', ' random_state=42', " splitter='best')))]>"]                                                                       |
| ensemble_ada  | steps=[('preprocess'", ' StandardScaler(copy=True', ' with_mean=True', ' with_std=True))', (" ('clf'", " AdaBoostClassifier(algorithm='SAMME.R'", ' base_estimator=None', ' learning_rate=1.0', ' n_estimators=500', ' random_state=42)))]>]                                                                                                                                                                 |
| gbm           | steps=[('preprocess'", ' StandardScaler(copy=True', ' with_mean=True', ' with_std=True))', (" ('clf'", " GradientBoostingClassifier(criterion='friedman_mse'", ' init=None', ' learning_rate=0.1', " loss='deviance'", ' max_depth=1', ' max_features=None', ' max_leaf_nodes=None', ' min_impurity_dec... subsample=1.0', ' tol=0.0001', ' validation_fraction=0.1', ' verbose=0', ' warm_start=False)))]>] |

|               |                                                                                                                                                                                                                                                                                                                                                                                                                                                                                                                                                                      |
|---------------|----------------------------------------------------------------------------------------------------------------------------------------------------------------------------------------------------------------------------------------------------------------------------------------------------------------------------------------------------------------------------------------------------------------------------------------------------------------------------------------------------------------------------------------------------------------------|
| Random forest | <pre>steps=[('preprocess"', ' StandardScaler(copy=True', ' with_mean=True', ' with_std=True)'), " ('clf"', ' RandomForestClassifier(bootstrap=True', ' class_weight=None', " criterion='gini'", '          max_depth=2', " max_features='sqrt"', ' max_leaf_nodes=None', '          min_impurity_decrease=0.0', ' min_impurity_split=None', ' min_samples_leaf=1', ' min_samples_split=2', '          min_weight_fraction_leaf=0.0', ' n_estimators=500', ' n_jobs=None', '          oob_score=False', ' random_state=42', ' verbose=0', ' warm_start=False)]]</pre> |
|---------------|----------------------------------------------------------------------------------------------------------------------------------------------------------------------------------------------------------------------------------------------------------------------------------------------------------------------------------------------------------------------------------------------------------------------------------------------------------------------------------------------------------------------------------------------------------------------|

**Table S10:** The panel of metabolites as chosen using the RFE feature selection algorithm to generate our predictive models.

| Model Ranking | PD_control vs. sPD    | LRRK2_control vs. LRRK2 | sPD vs. LRRK2         |
|---------------|-----------------------|-------------------------|-----------------------|
| 1             | 3-Hydroxybutyric acid | PC ae C38:0             | C5                    |
| 2             | SM C16:0              | Ethanol                 | PC ae C40:4           |
| 3             | lysoPC a C26:1        | Putrescine              | lysoPC a C26:1        |
| 4             | PC aa C36:6           | PC ae C36:2             | 2-Hydroxybutyric acid |
| 5             | Isopropyl alcohol     | TCA                     | SM C16:0              |

**Figure S1:** Typical 1D  $^1\text{H}$  NMR spectrum of CSF from a patient suffering from Parkinson's disease (a-c). Metabolites are numbered as follows: DSS, 2-hydroxyisovalerate, 2-hydroxybutyrate, pantothenate, leucine, 2-aminobutyrate, isoleucine, 3-hydroxyisovalerate, valine, isopropanol, ethanol, 3-hydroxybutyrate, lactate, alanine, acetate, butyrate, ornithine, acetaminophen, acetone, 3-hydroxyisovalerate, acetoacetate, pyruvate, succinate, 2-oxoglutarate, 3-hydroxyisobutyrate, citrate, glutamine, dimethylamine, creatine, creatinine, cis-aconitate, malonate, dimethyl sulfano, choline, glucose, myo-inositol, histamine, methanol, glycerol, methionine, ascorbate, threonine, mannose, fructose, propylene glycerol, pyroglutamate, urea, tyrosine, phenylalanine, xanthine, formate, histidine, tyrosine.

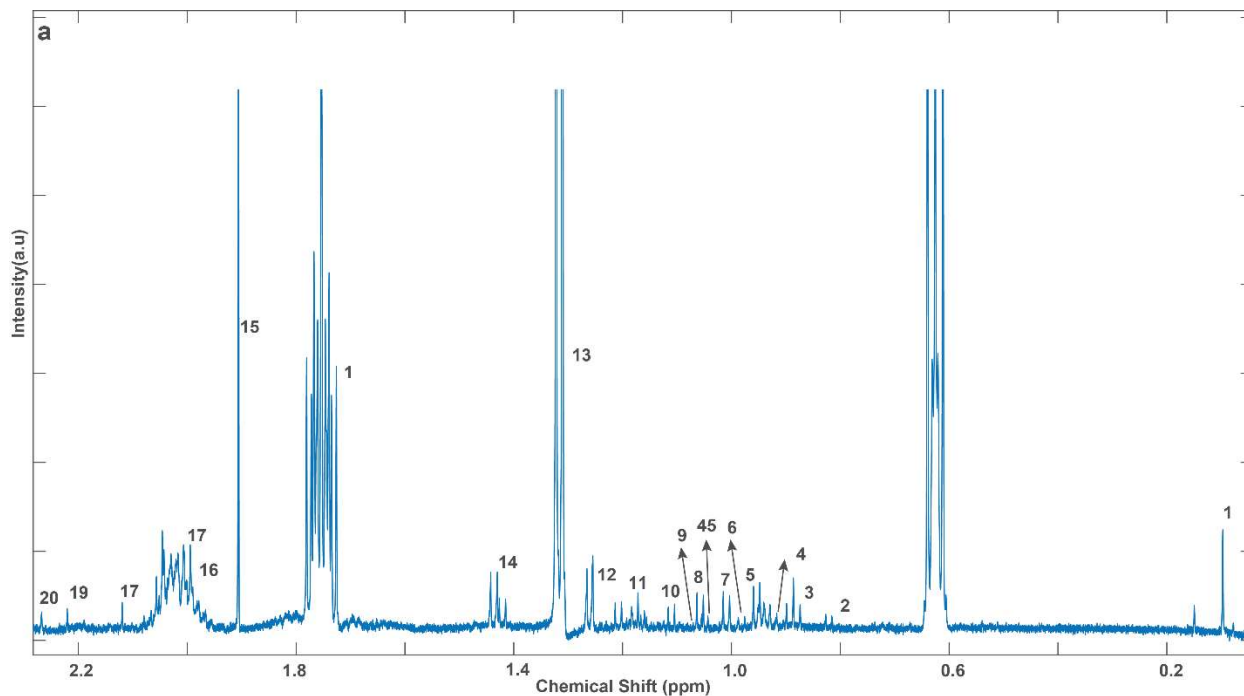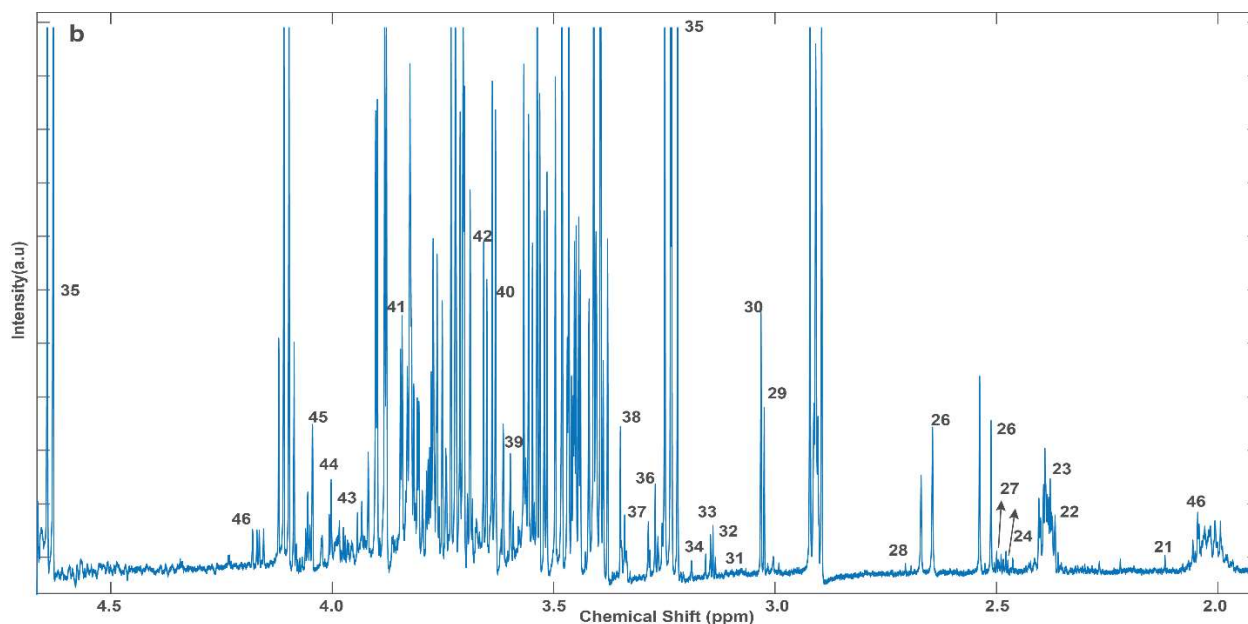

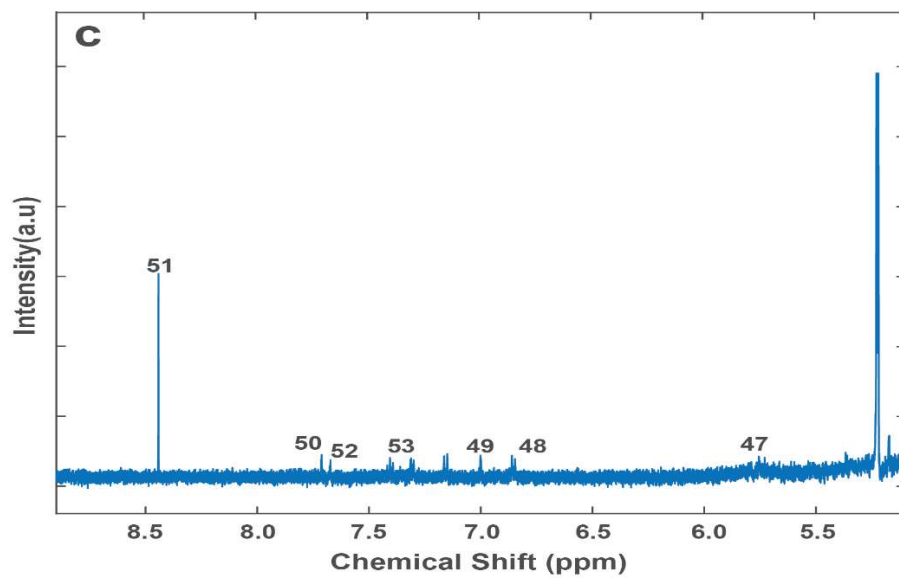



**Figure S2:** Investigation of potential outliers for each group by PCA (a–d) and Q2 vs. T<sup>2</sup>Hotelling plots (e,f).

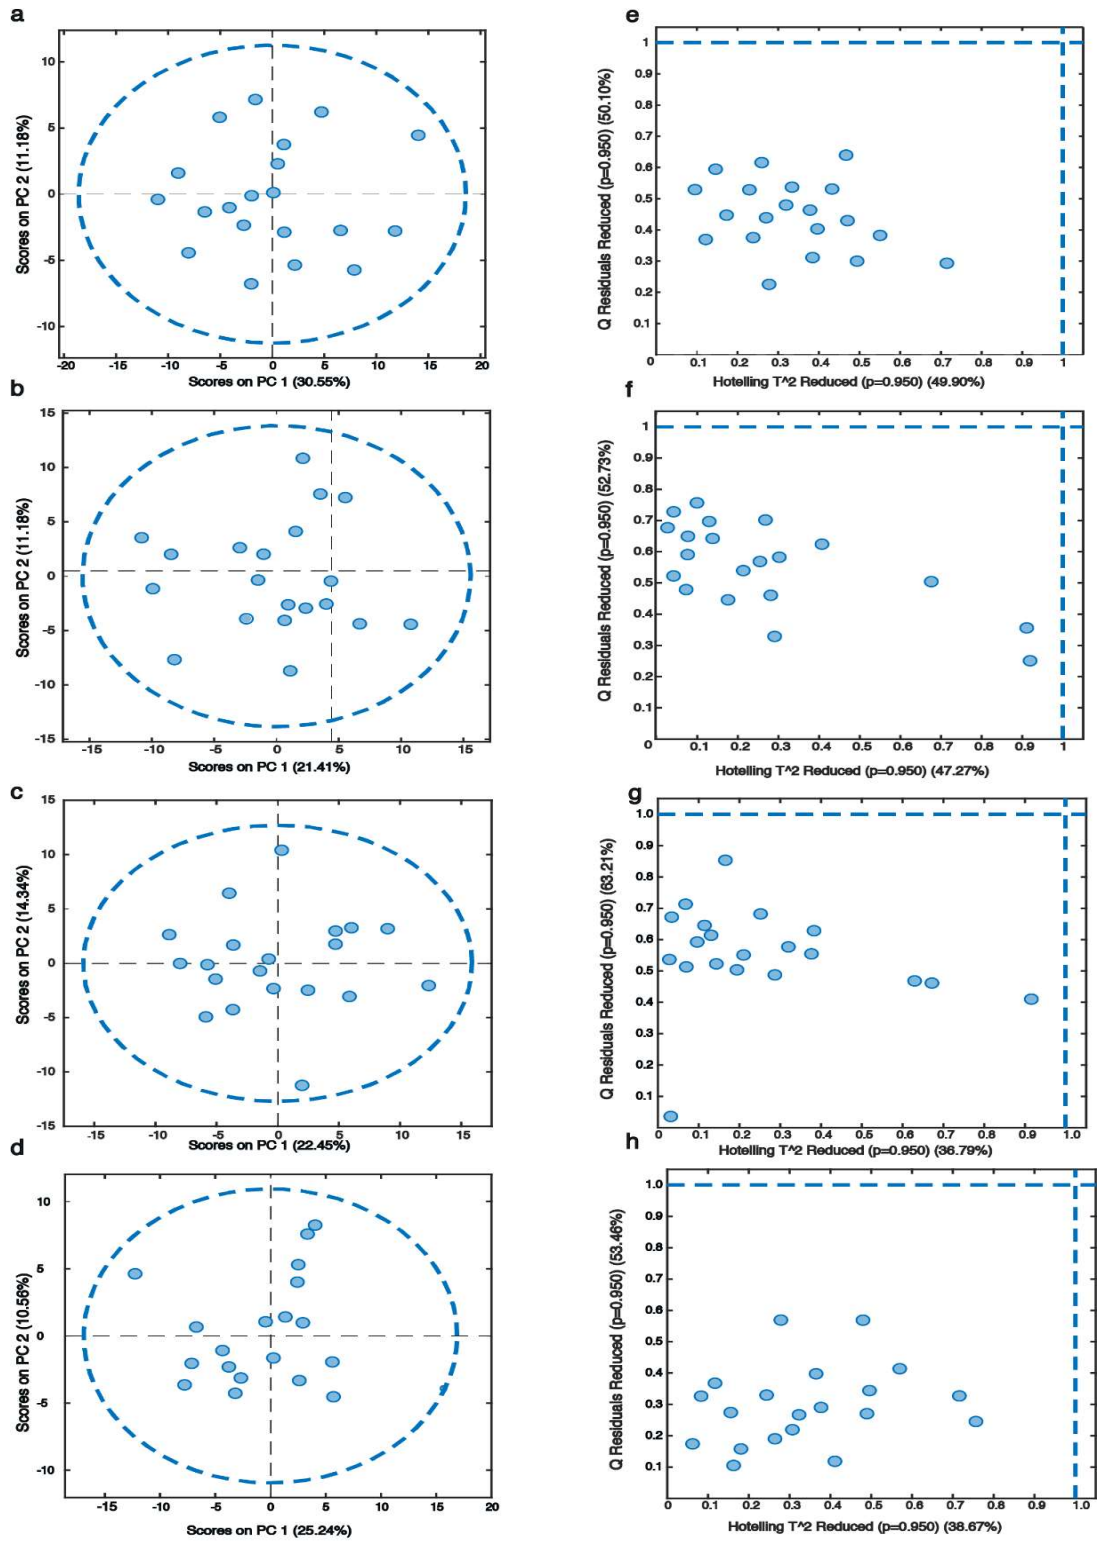

**Figure S3:** QQ-plots used to determine whether the recorded concentration of metabolomics data is normally distributed and whether the corresponding p-value is inflated.

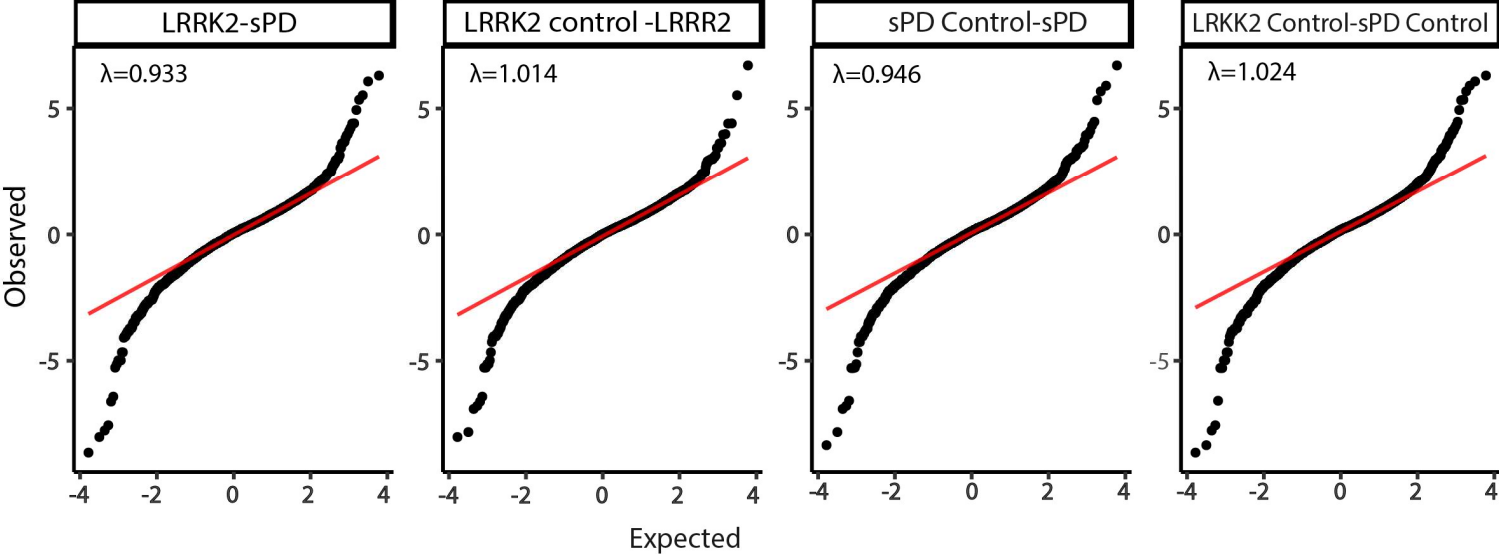

**Figure S4:** Boxplots of the CSF metabolites found to be at significantly different concentrations across the groups

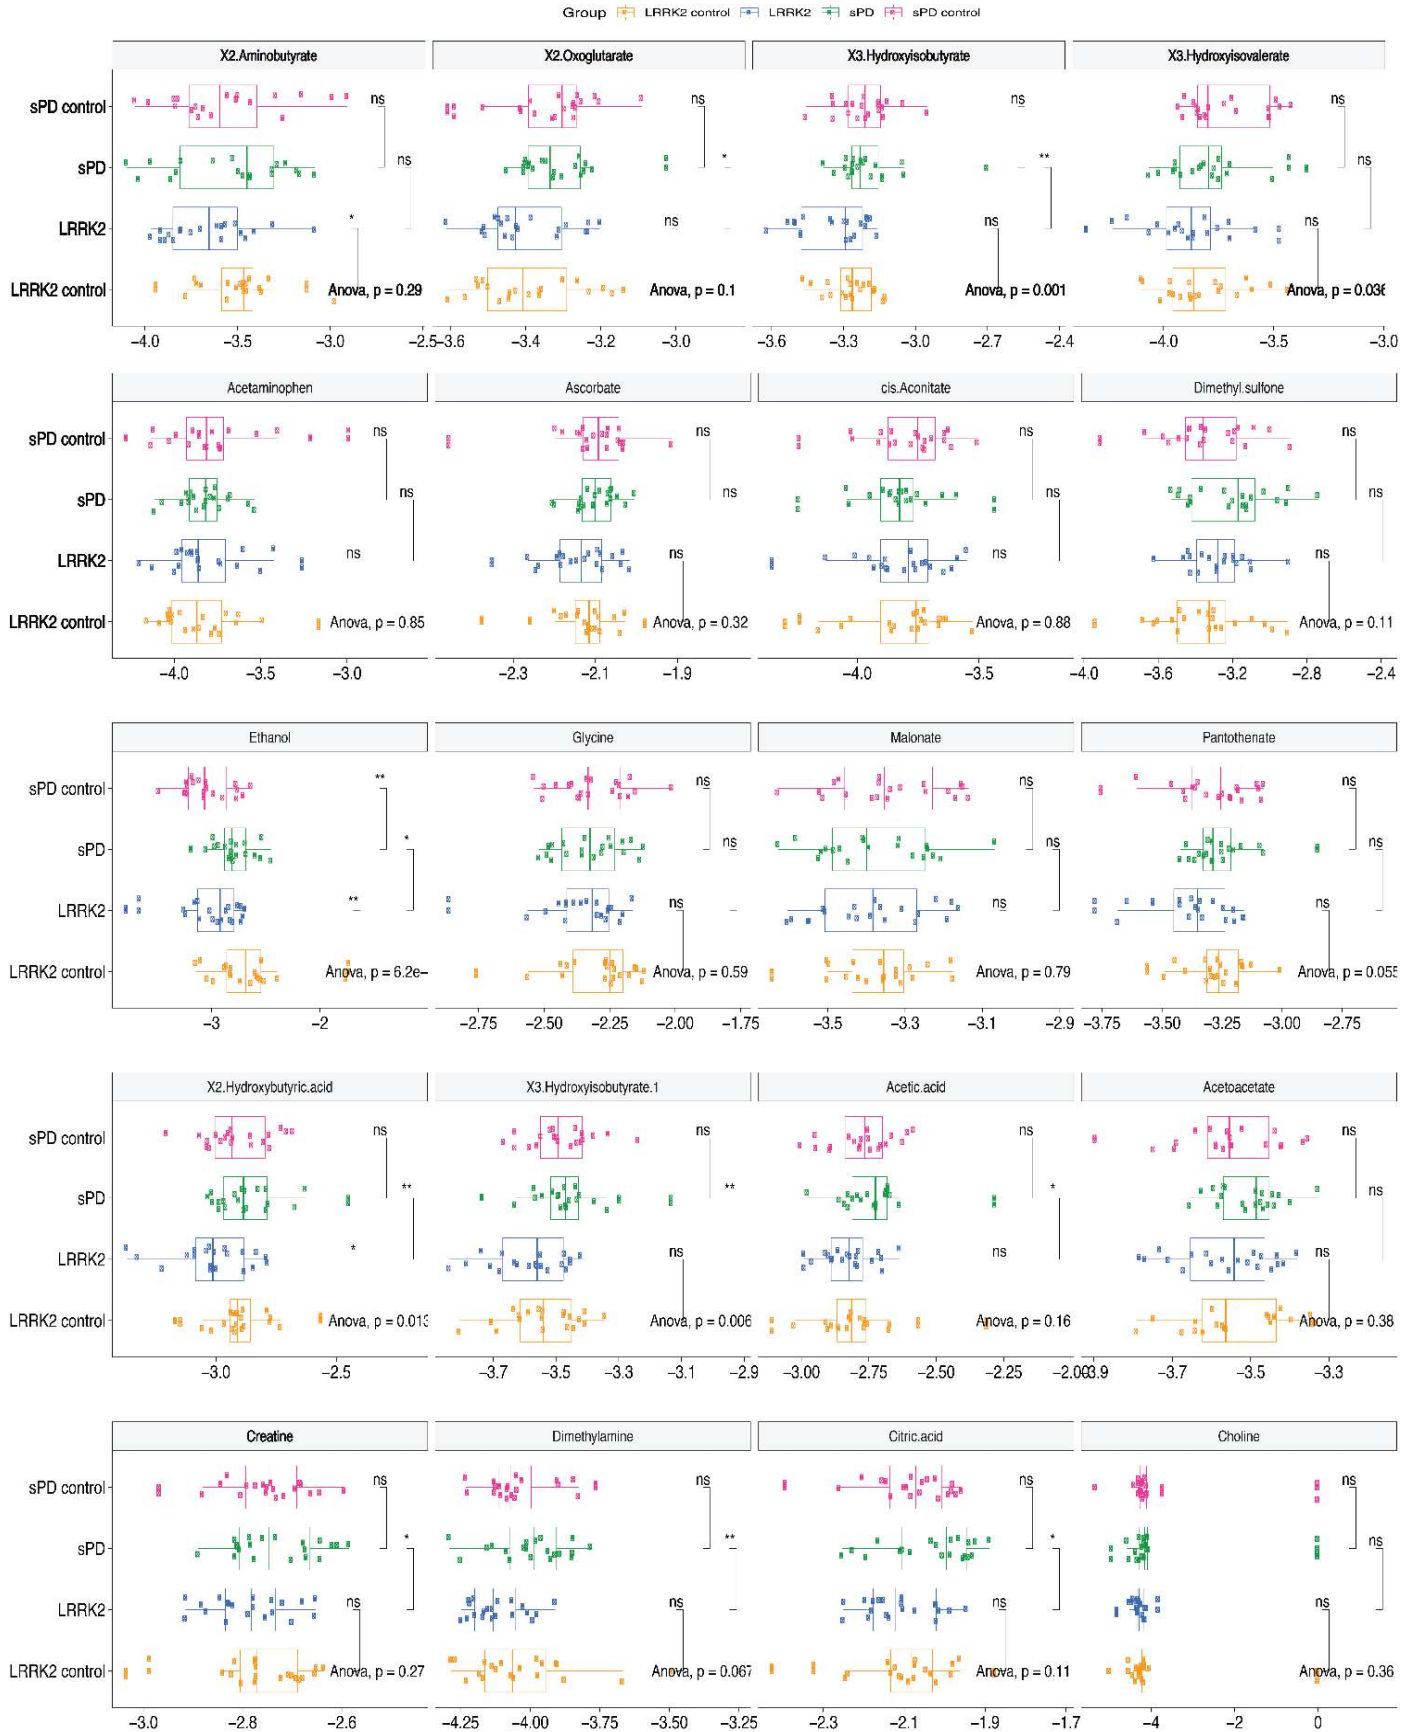

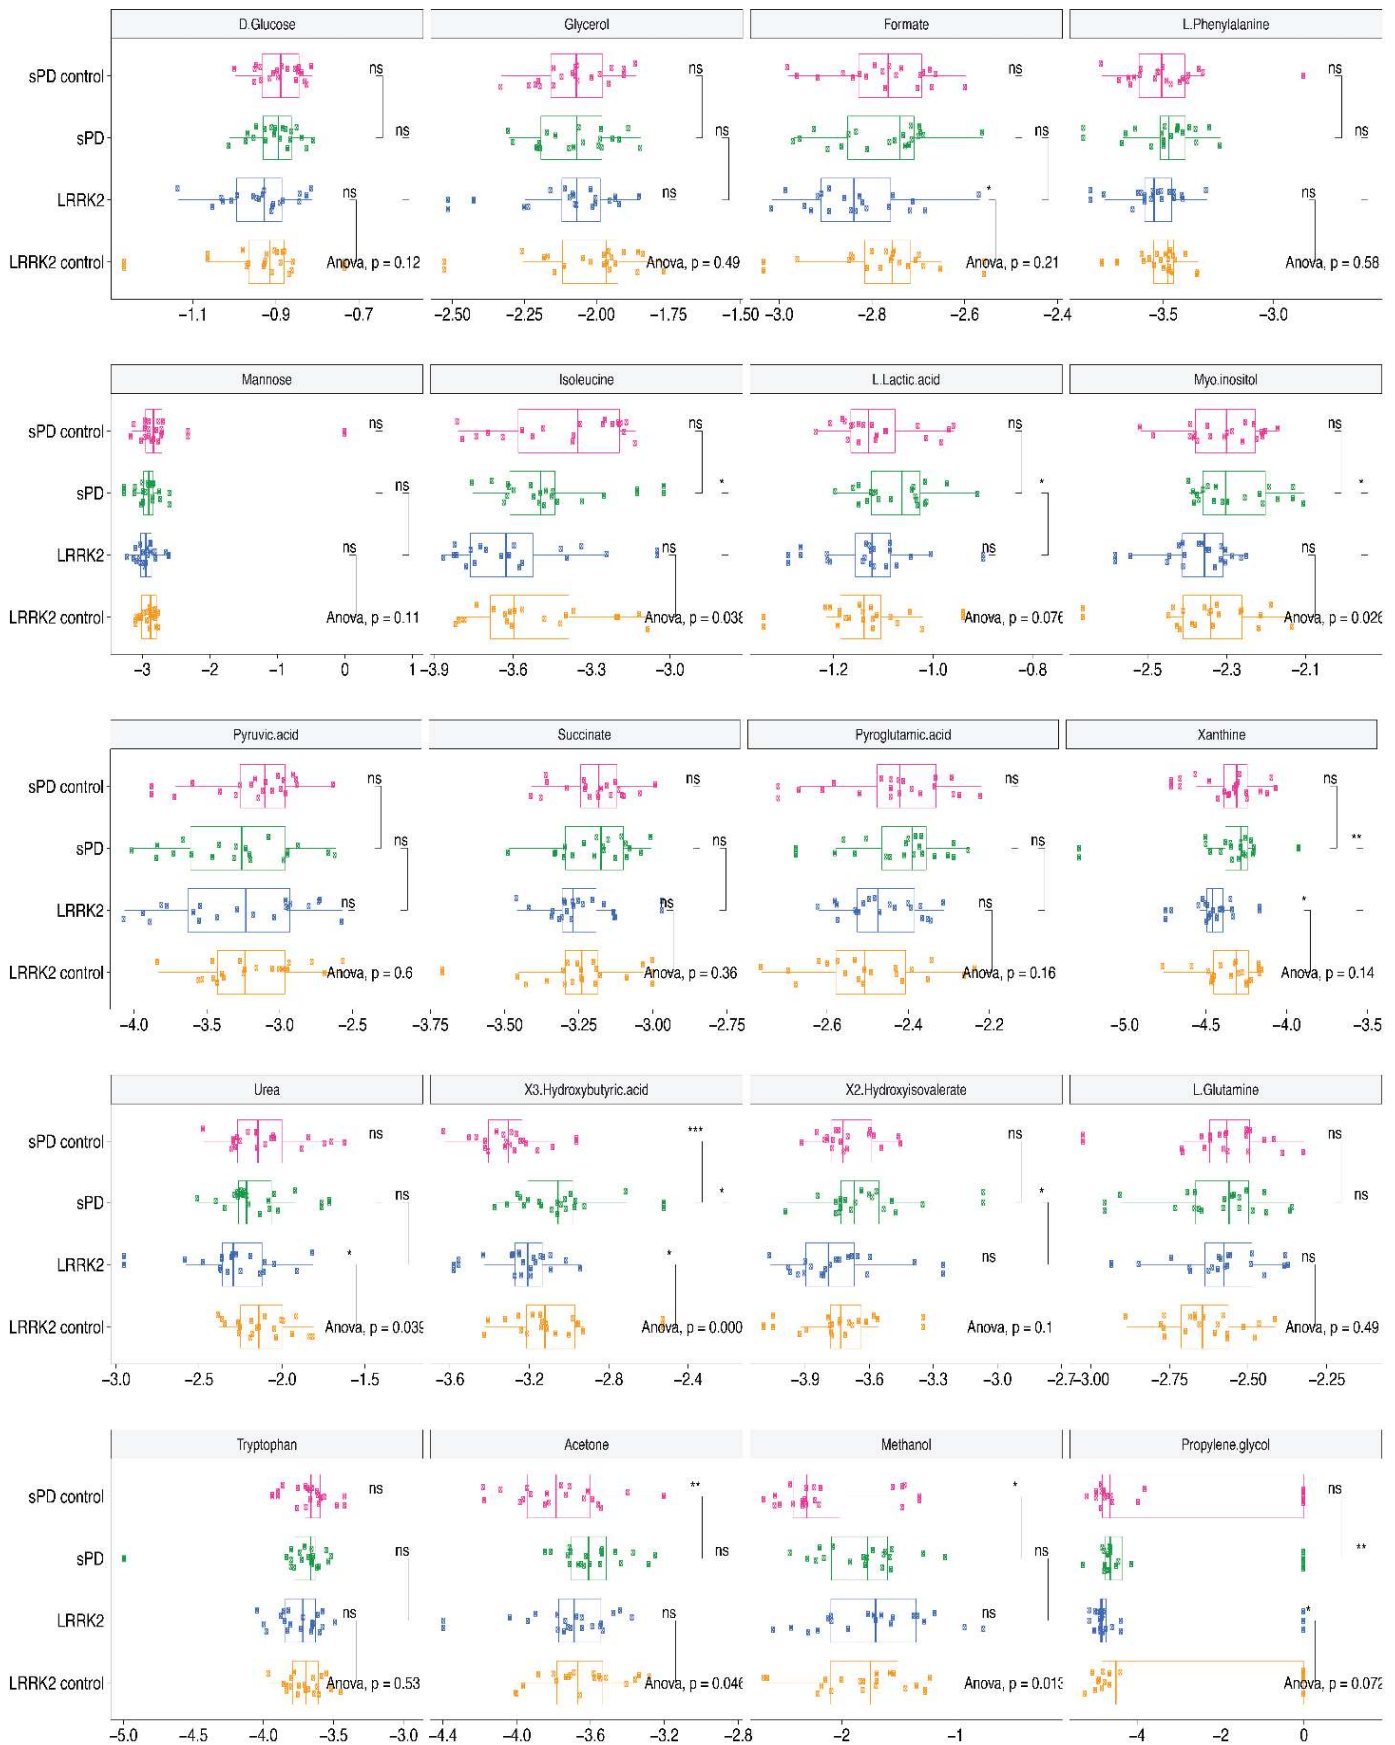

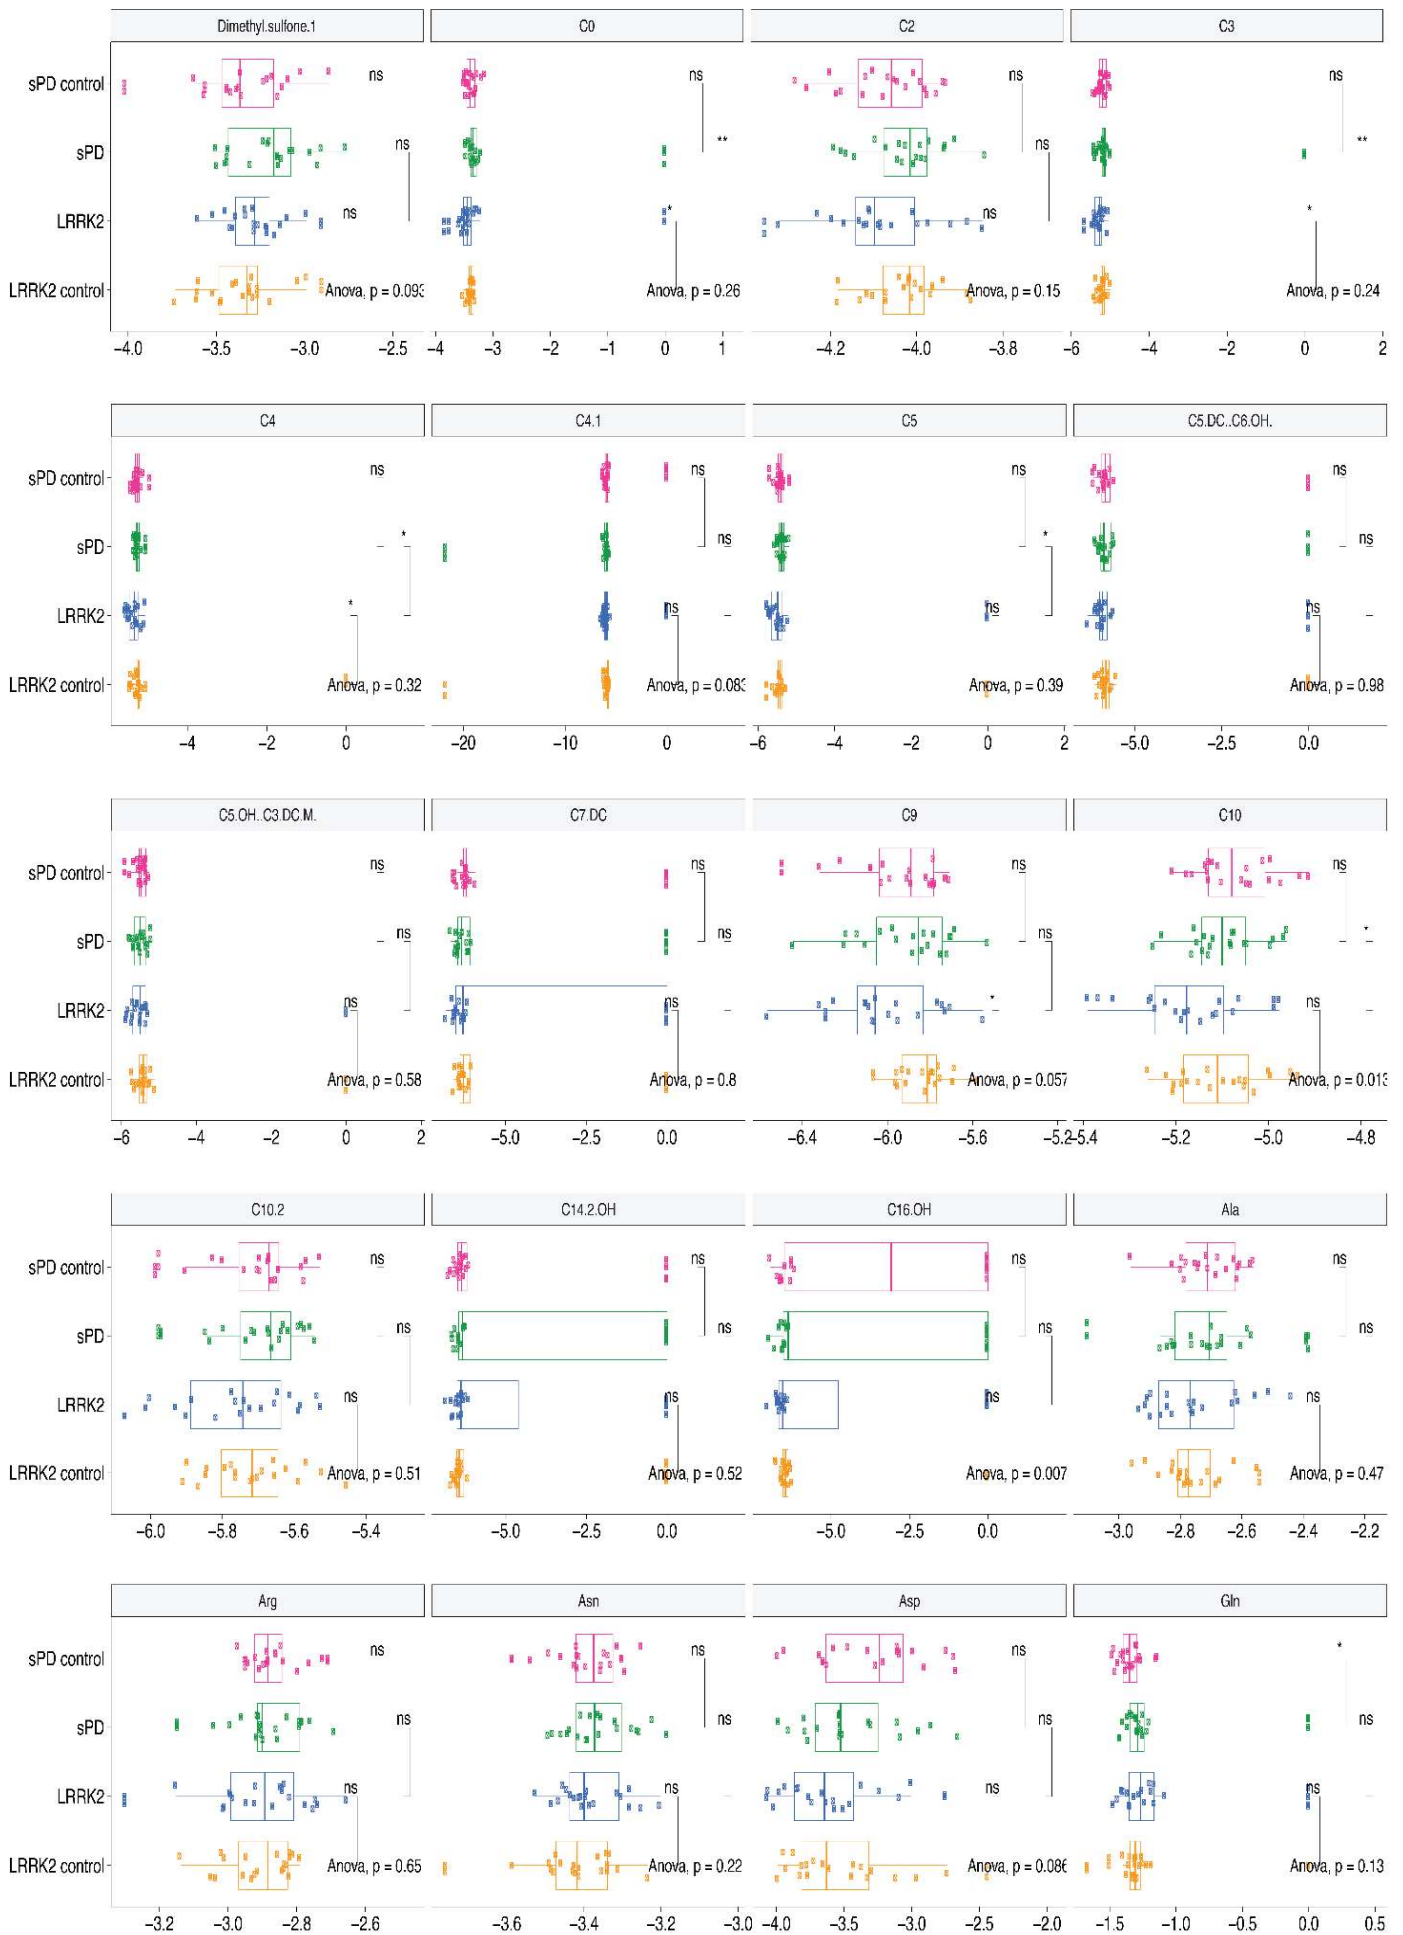



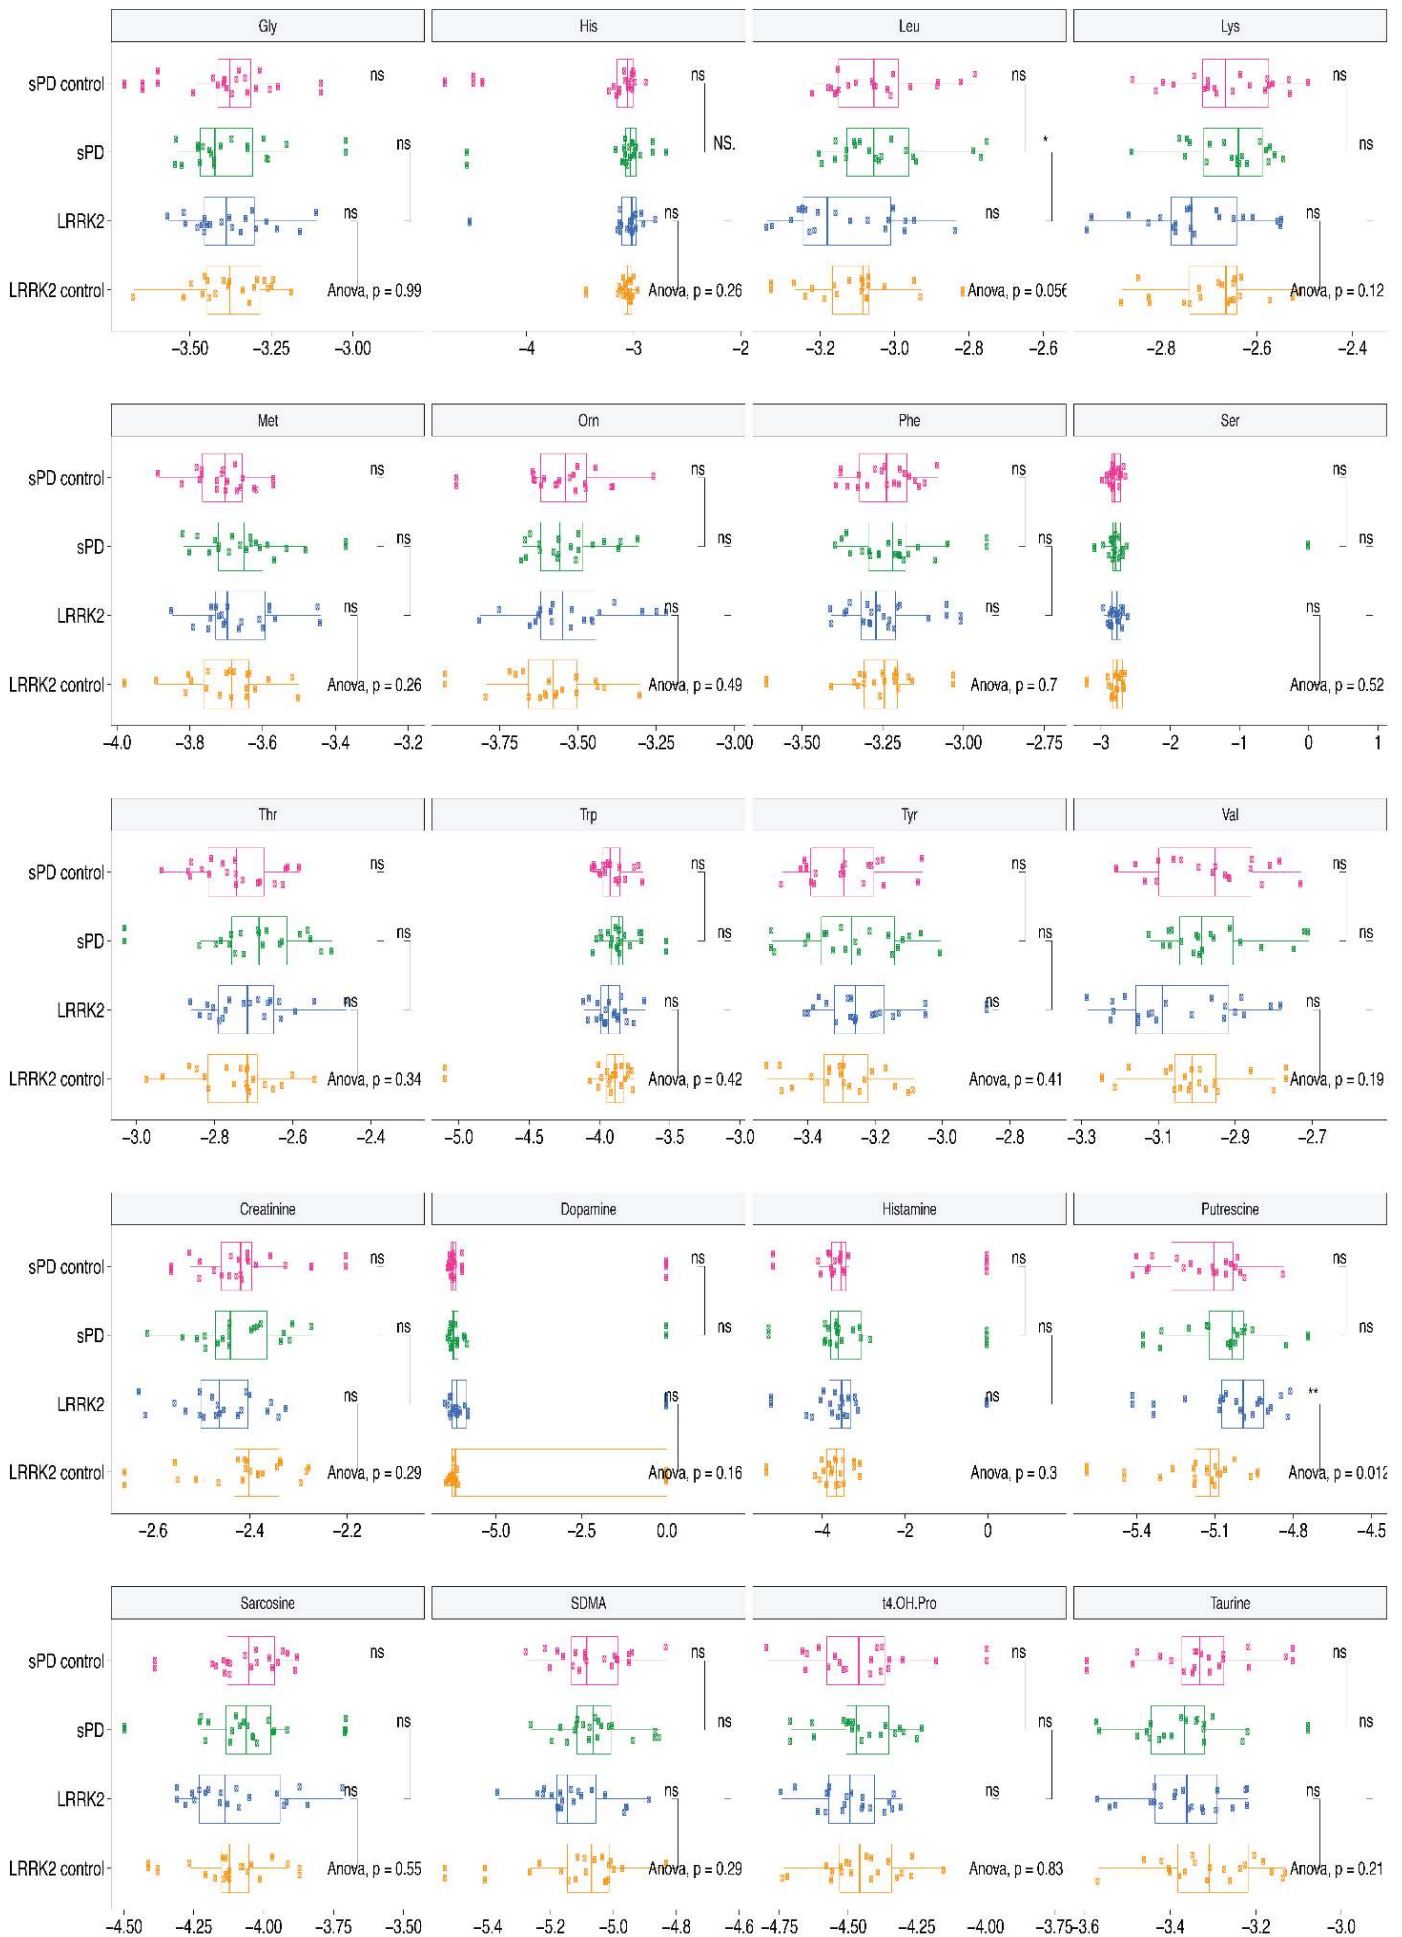

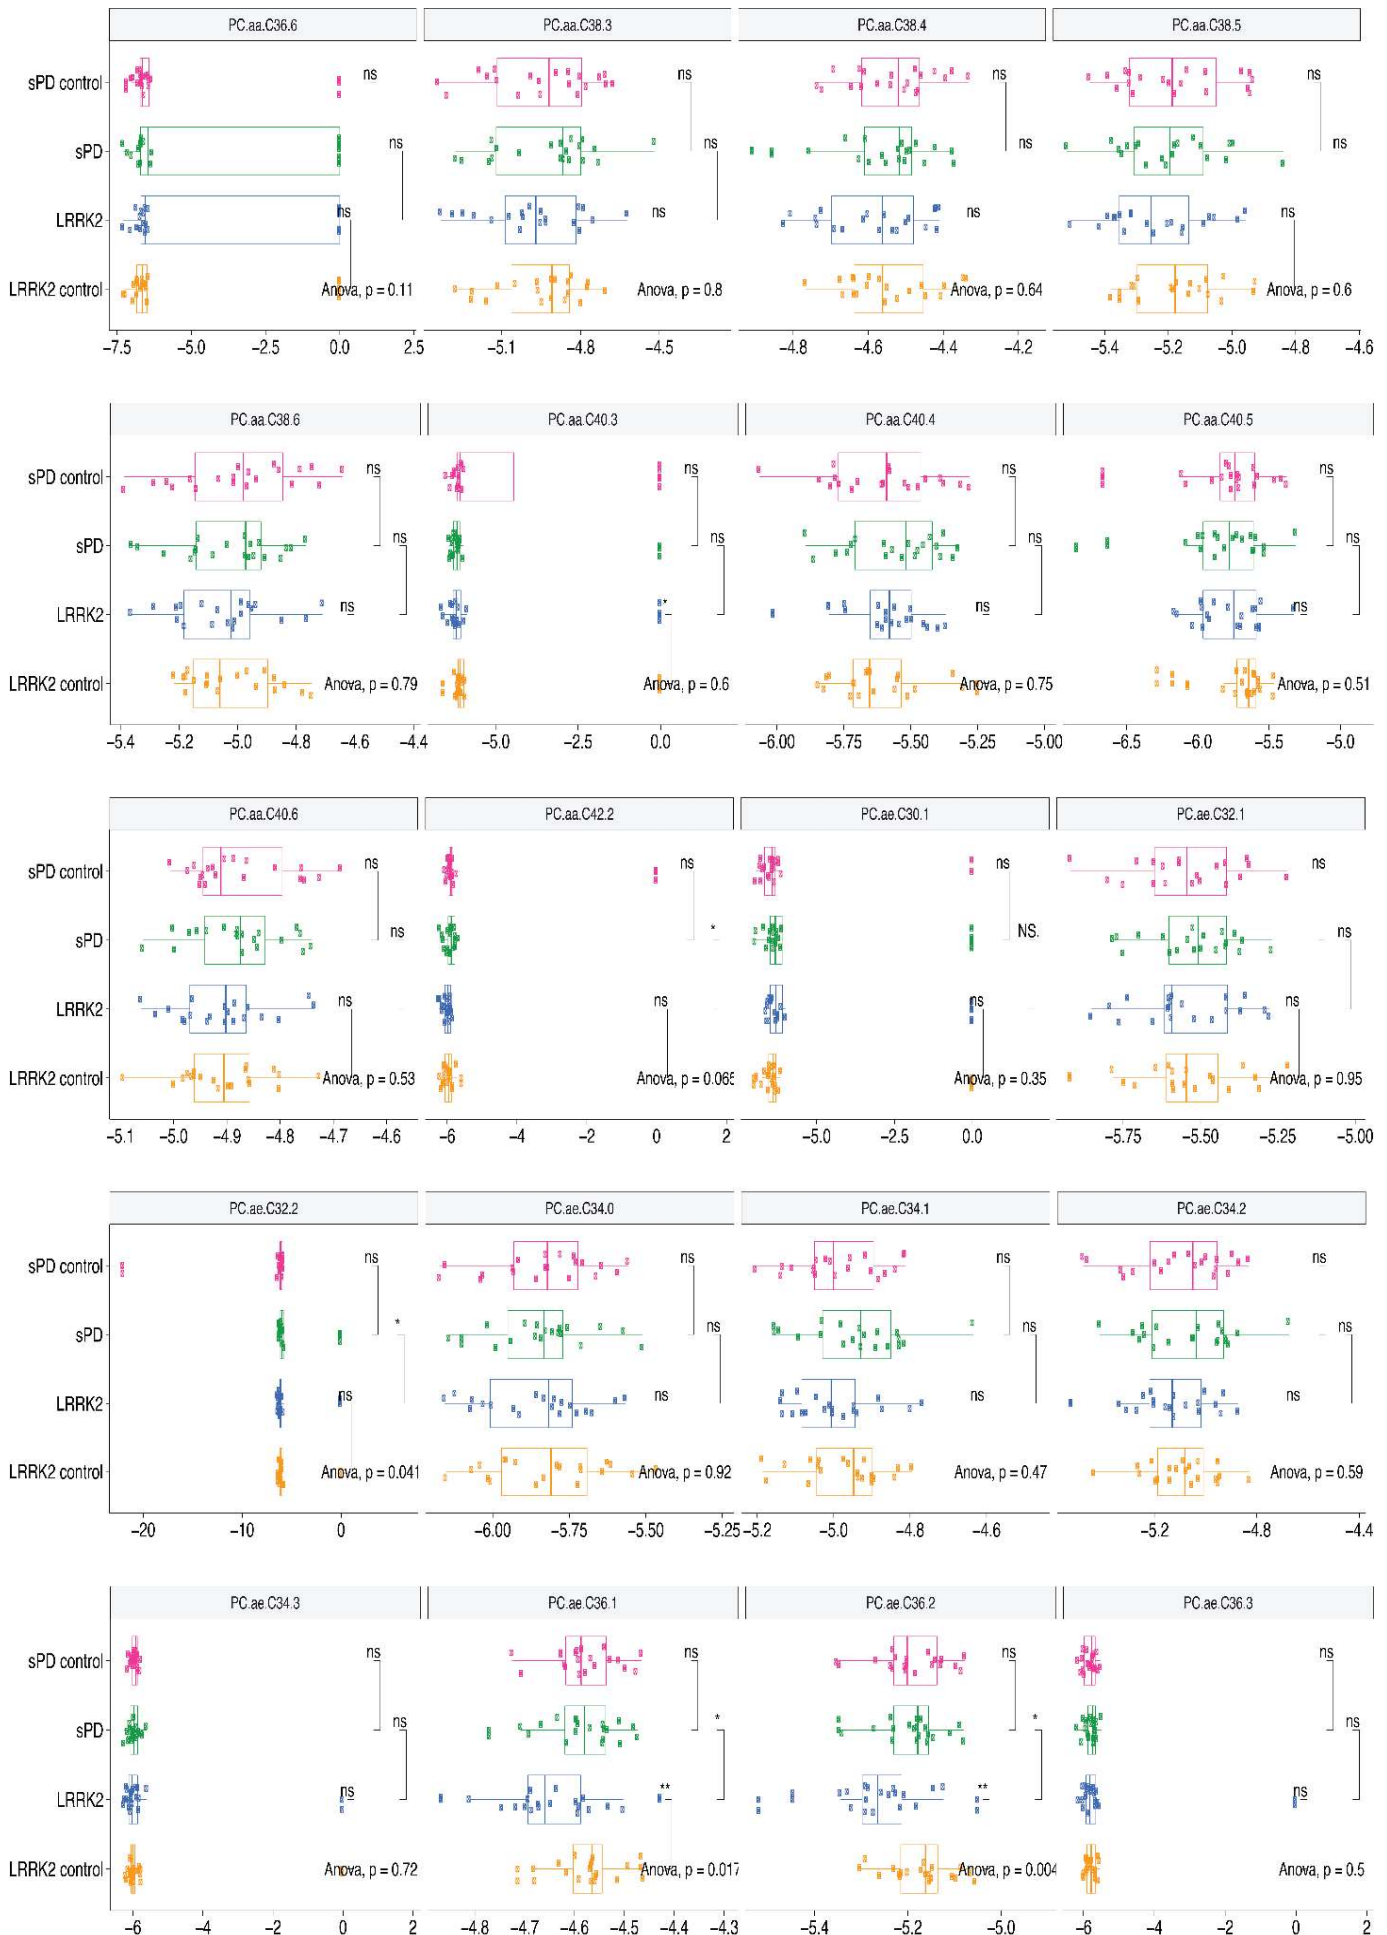

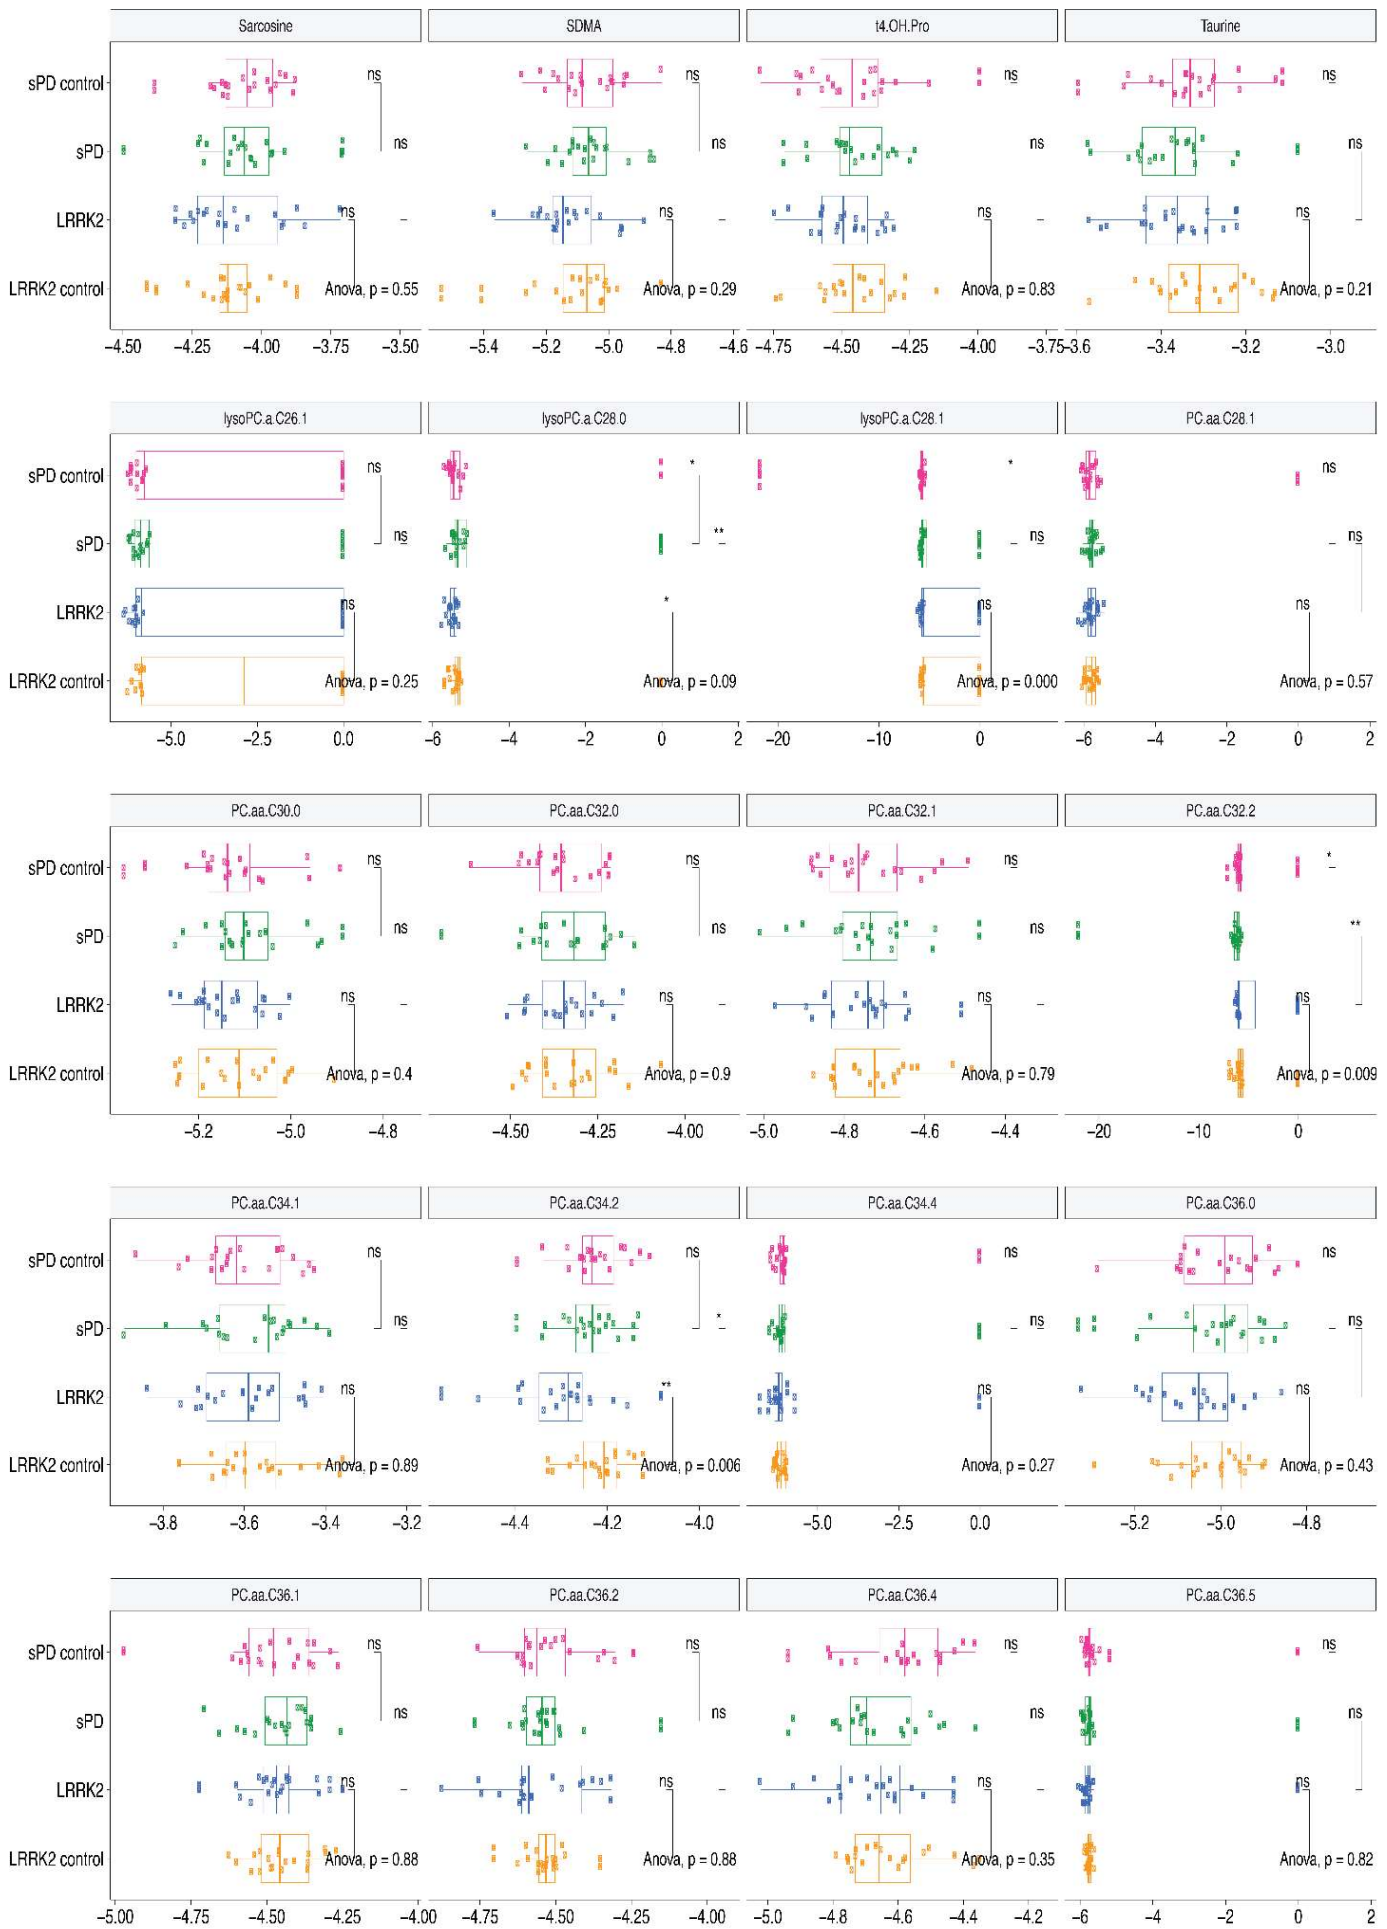



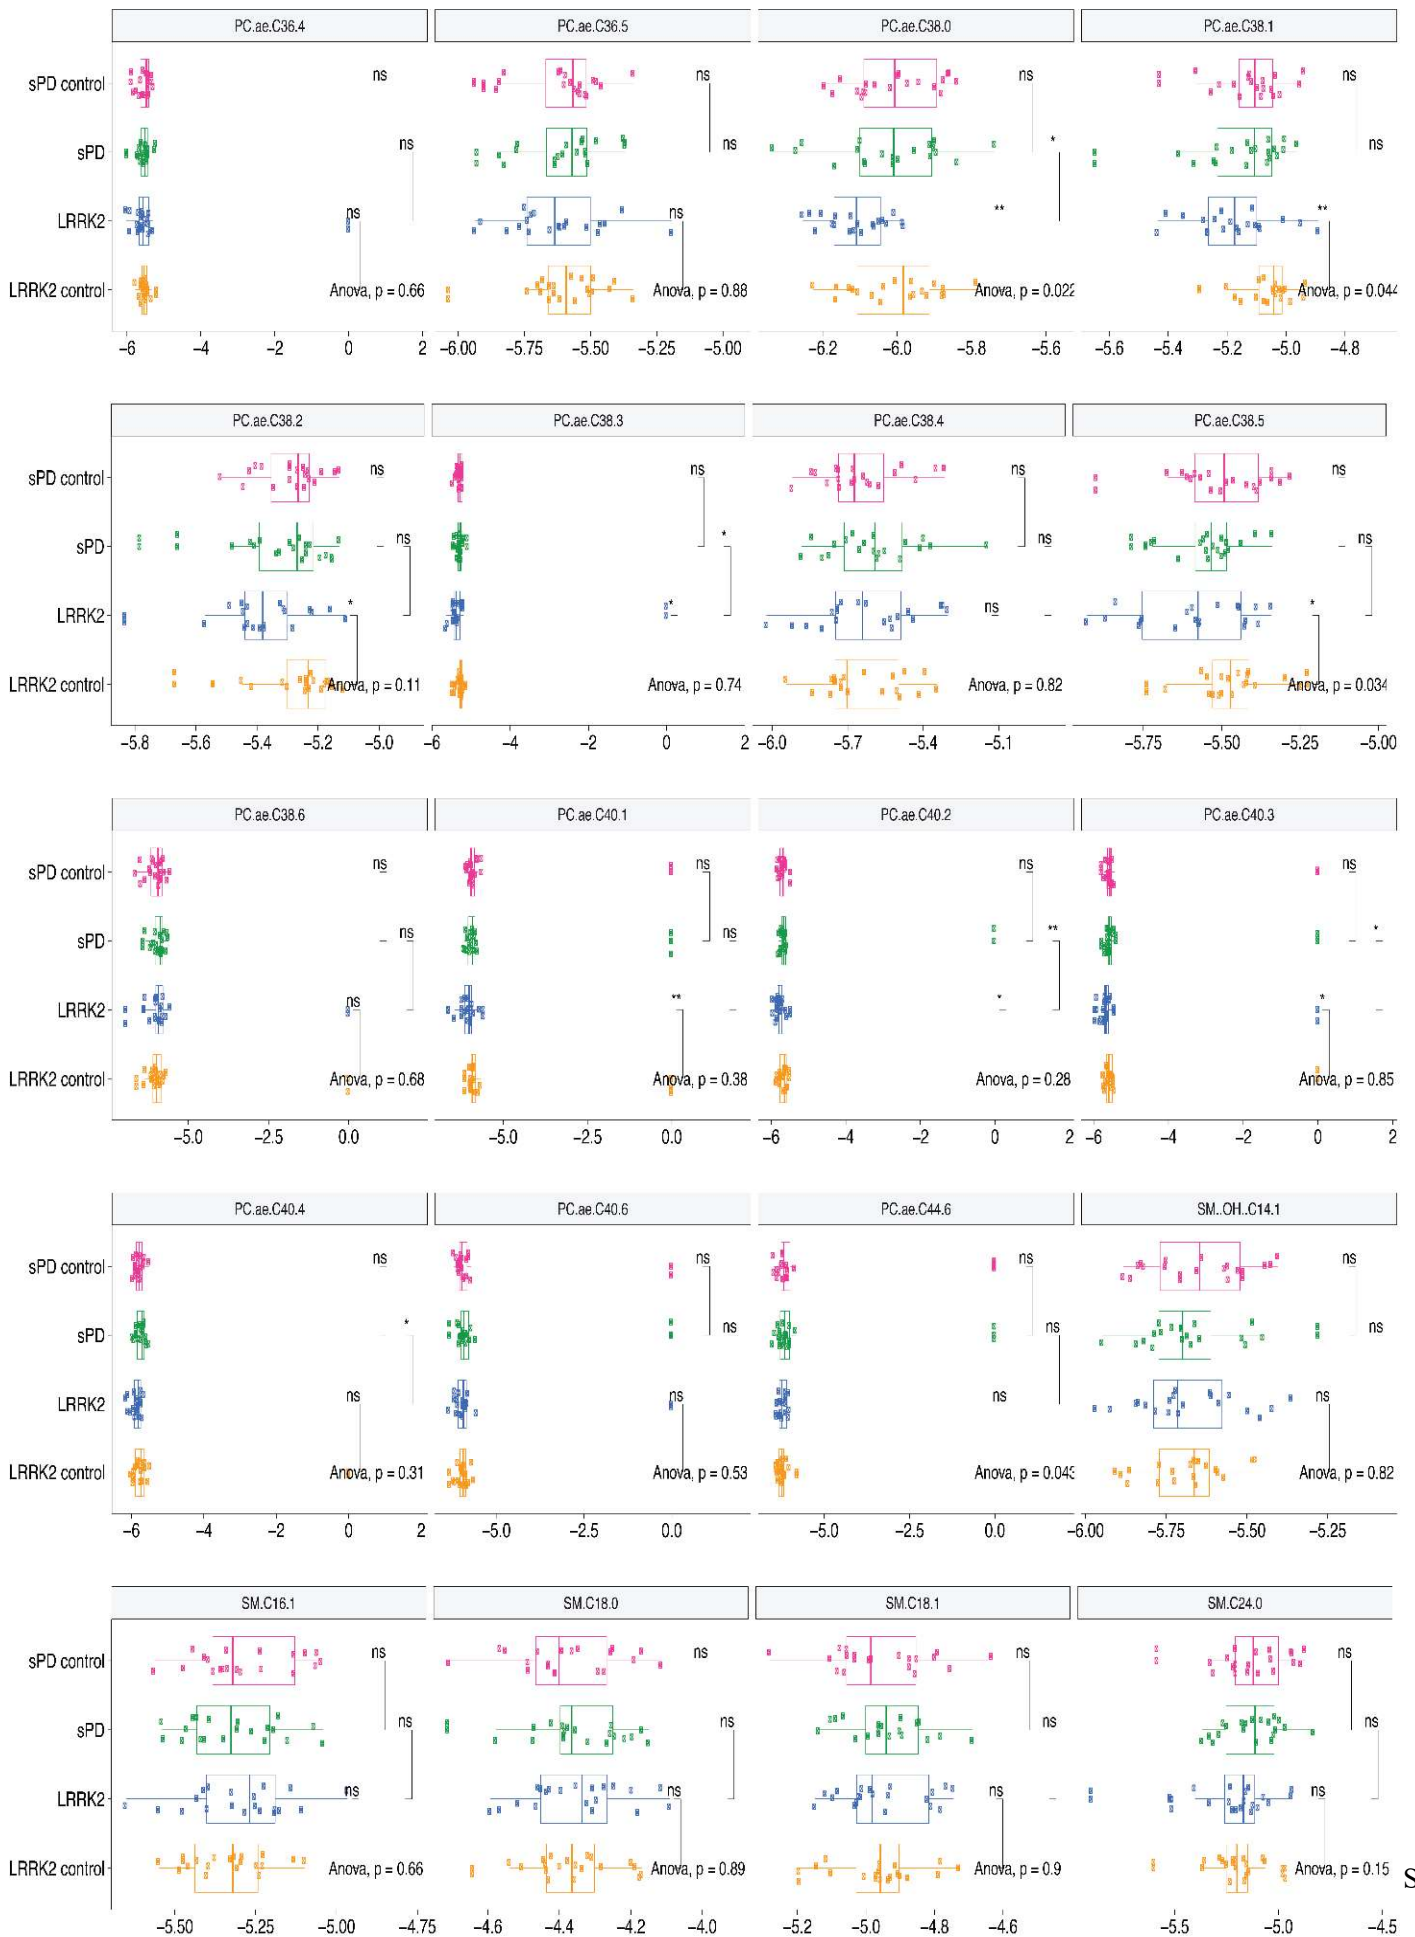

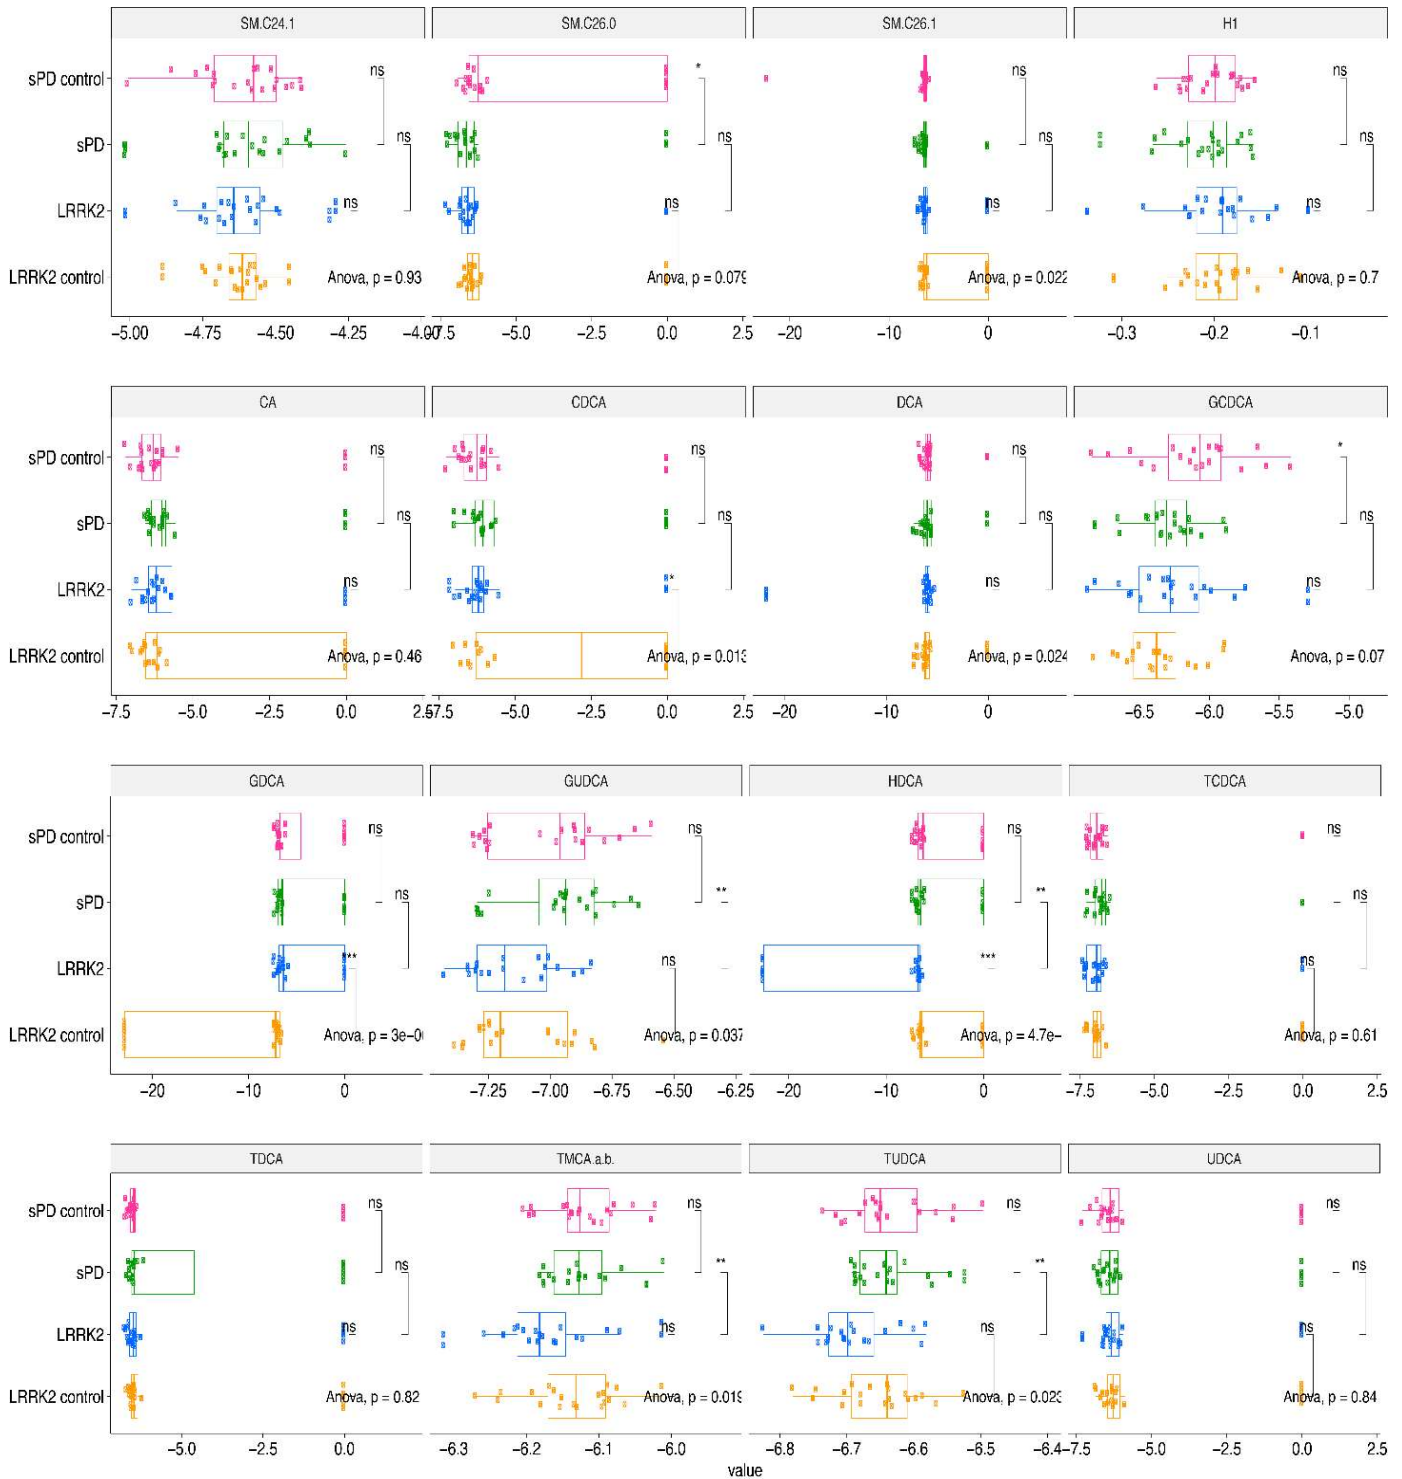

ns: No significant difference in the average concentration values of certain metabolite between the two groups was observed.

\*: A significant difference in the average concentration values of certain metabolite between sPD and sPD control groups was observed.

\*\* : A significant difference in the average concentration values of certain metabolite between LRRK2 and LRRK2 control groups was observed

\*\*\*: A significant difference in the average concentration values of certain metabolite between LRRK2 and sPD groups was observed

**Figure S5:** AUROC plot for the top three ML-based predictive models for the classification of LRRK2 PD as compared to the corresponding controls.

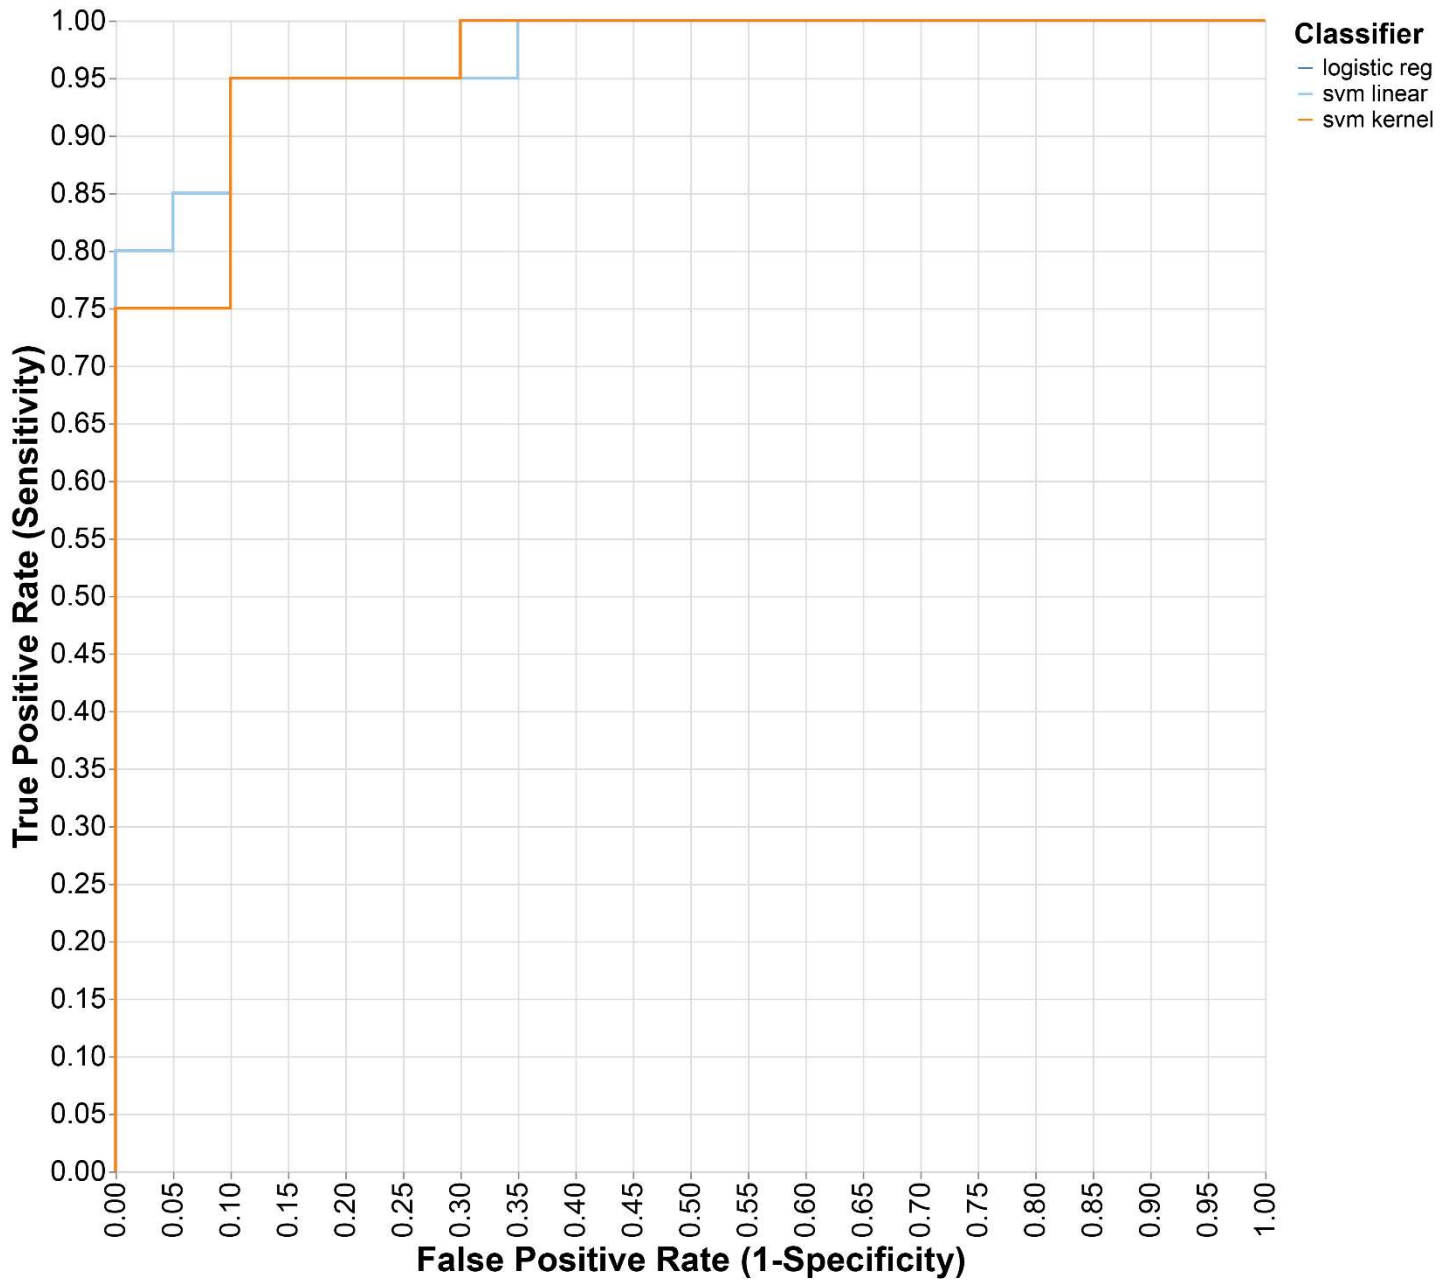

**Figure S6:** AUROC plot for top three ML-based predictive models for the classification of sPD as compared to the corresponding controls.

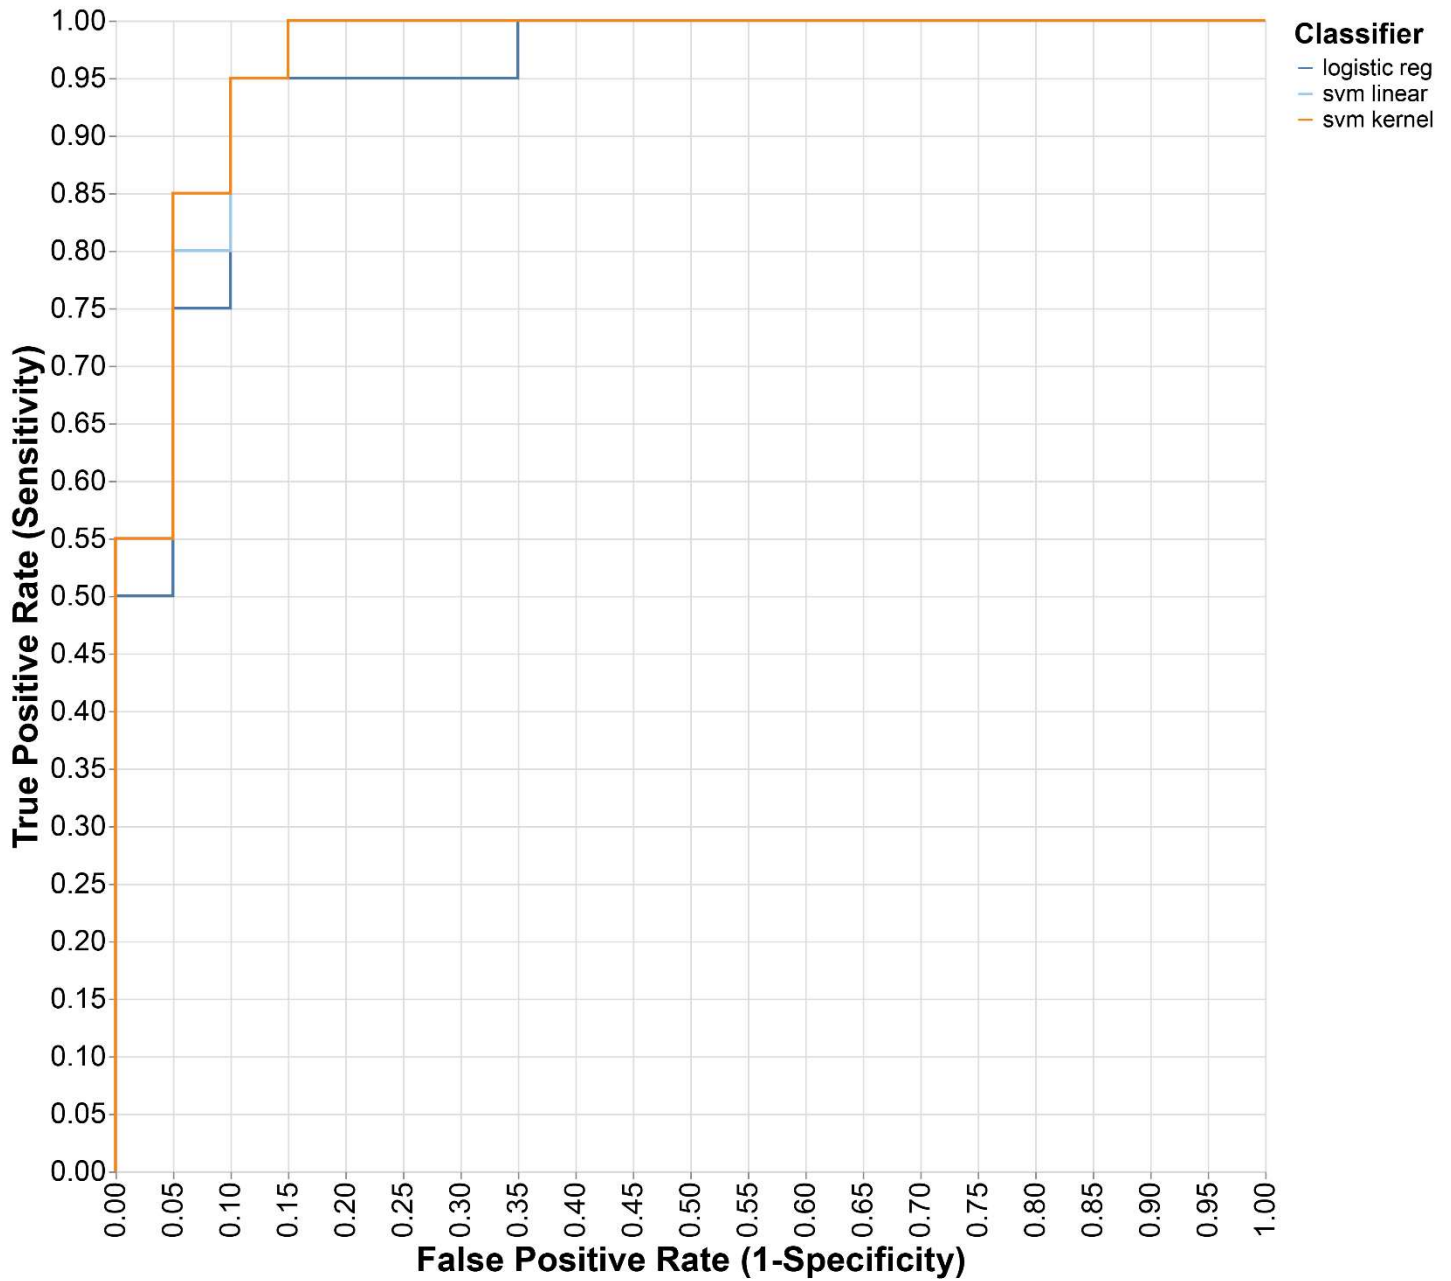

**Figure S7:** AUROC plot for top three ML-based predictive models for the classification of sPD as compared to LRRK2 PD.

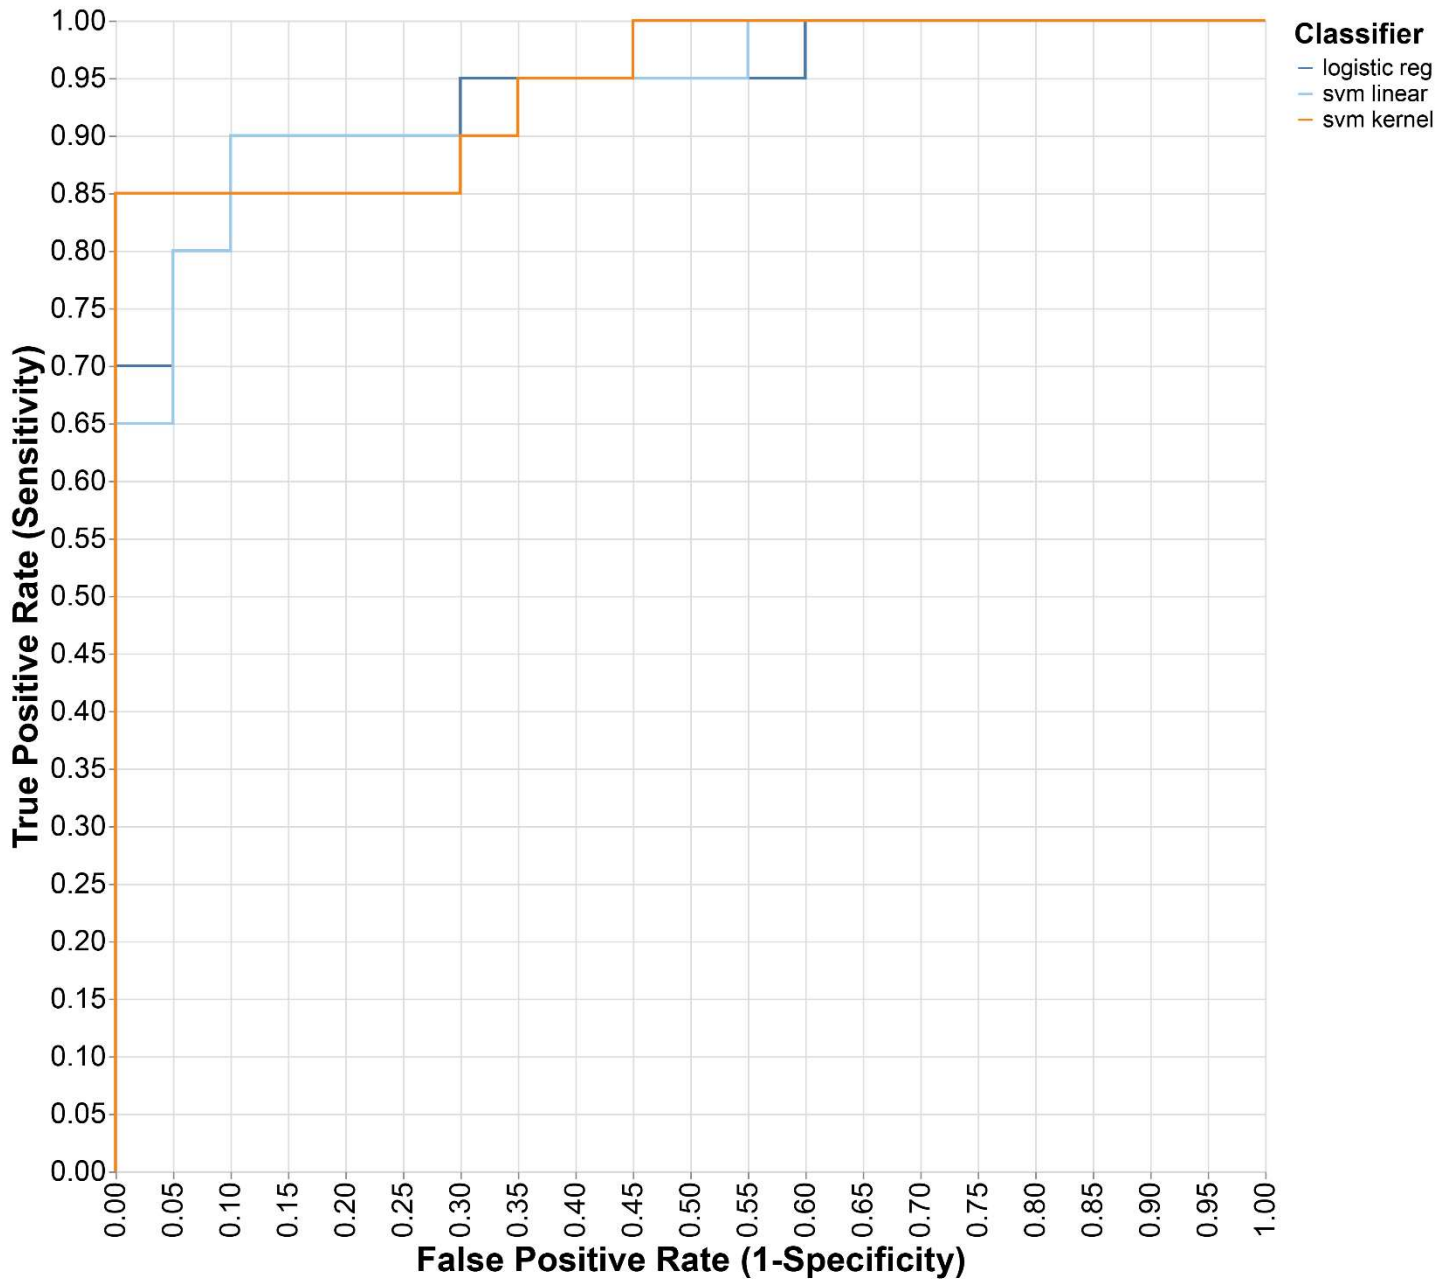

Supplement: cells-09-02394-s001.pdf [file cells-09-02394-s001.pdf]
